# Supplementary material for: Light-driven decarboxylative deuteration enabled by a divergently engineered photodecarboxylase
Source: PubMed Central journal article supplement (PMC8233396; doi:10.1038/s41467-021-24259-6), 2021-06-25
Supplement: 41467_2021_24259_MOESM1_ESM.pdf [file 41467_2021_24259_MOESM1_ESM.pdf]

# Supplementary Information

## **Light-driven decarboxylative deuteration enabled by a divergently engineered photodecarboxylase**

Jian Xu<sup>1,2,4\*</sup>, Jiajie Fan<sup>1,4</sup>, Yujiao Lou<sup>1,4</sup>, Weihua Xu<sup>1,4</sup>, Zhiguo Wang<sup>3,4</sup>, Danyang Li<sup>1</sup>, Haonan Zhou<sup>1</sup>, Xianfu Lin<sup>1</sup>  
& Qi Wu<sup>1\*</sup>

<sup>1</sup> Center of Chemistry for Frontier Technologies, Department of Chemistry, Zhejiang University, Hangzhou, 310027, P. R. China. \*e-mail: wuqi1000@163.com or llc123@zju.edu.cn.

<sup>2</sup> College of Biotechnology and Bioengineering, Zhejiang University of Technology, Hangzhou, 310014, P. R. China. \*e-mail: jianxu@zjut.edu.cn.

<sup>3</sup> Institute of Aging Research, School of Medicine, Hangzhou Normal University, Hangzhou, 311121, P. R. China.

<sup>4</sup> These authors contributed equally.

## Supplementary Figures

|                                                                                                                                                    |        |
|----------------------------------------------------------------------------------------------------------------------------------------------------|--------|
| <i>Supplementary Fig. 1. Dependence of cosolvent in the CvFAP catalyzed decarboxylative deuteration.</i>                                           | 3      |
| <i>Supplementary Fig. 2. The effect of substrate concentration on the CvFAP catalyzed decarboxylative deuteration.</i>                             | 4      |
| <i>Supplementary Fig. 3. The progress curve of CvFAP catalyzed decarboxylative deuteration.</i>                                                    | 5      |
| <i>Supplementary Fig. 4. Effect of water content in the enzyme system on the D- incorporation.</i>                                                 | 6      |
| <i>Supplementary Fig. 5. Screening results of the FRISM library using the model decarboxylation of nonanoic acid.</i>                              | 7      |
| <i>Supplementary Fig. 6. Recovered times of D<sub>2</sub>O in the CvFAP catalyzed decarboxylative deuteration.</i>                                 | 8      |
| <i>Supplementary Fig. 7. SDS-PAGE of WT-CvFAP and mutants.</i>                                                                                     | 9      |
| <i>Supplementary Fig. 8. Derivatization of 5d to (+)-Igmisine-d<sub>1</sub> with reported methods.</i>                                             | 10     |
| <i>Supplementary Fig. 9-14. Comparison of the distance between the carboxyl of substrates and the N5 atom of FAD in variants by MD simulation.</i> | 11-16  |
| <i>Supplementary Fig. 15-25. Chiral GC chromatogram of the enantioselective decarboxylative deuteration of 4a-4k.</i>                              | 17-27  |
| <i>Supplementary Fig. 26. NMR spectra of 2-(Hexadecyloxy)acetic acid (1I).</i>                                                                     | 28     |
| <i>Supplementary Fig. 27. NMR spectra of 2-(Dodecyloxy)acetic acid (2K).</i>                                                                       | 29     |
| <i>Supplementary Fig. 28-36. NMR spectra of 4A-4I.</i>                                                                                             | 30-38  |
| <i>Supplementary Fig. 37-47. NMR (or/and HRMS) spectra of 1a-1k.</i>                                                                               | 39-56  |
| <i>Supplementary Fig. 48-58. NMR (or/and HRMS) spectra of 2a-2k.</i>                                                                               | 57-71  |
| <i>Supplementary Fig. 59-66. HRMS spectra of 3a-3h.</i>                                                                                            | 72-79  |
| <i>Supplementary Fig. 67-77. NMR (or/and HRMS) spectra of 4a-4k.</i>                                                                               | 80-90  |
| <i>Supplementary Fig. 78-88. NMR (or/and HRMS) spectra of 5a-5k.</i>                                                                               | 91-103 |

## Supplementary Tables

|                                                                                                                       |     |
|-----------------------------------------------------------------------------------------------------------------------|-----|
| <i>Supplementary Table 1 List of primers.</i>                                                                         | 104 |
| <i>Supplementary Table 2 The ratio of M-1 peak to M peak in HRMS of various hydrocarbons with low boiling points.</i> | 105 |
| <i>Supplementary Table 3 Evaluation of the difference of D-incorporation determined by NMR and HRMS.</i>              | 106 |
| <i>Supplementary Table 4 Protein sequence of CvFAP.</i>                                                               | 107 |
| <i>Supplementary Table 5 DNA sequence of CvFAP.</i>                                                                   | 108 |
| <i>Supplementary Table 6 Characterization data of prepared substrates and products.</i>                               | 109 |

|                                 |     |
|---------------------------------|-----|
| <b>Supplementary References</b> | 117 |
|---------------------------------|-----|

## Supplementary Figures

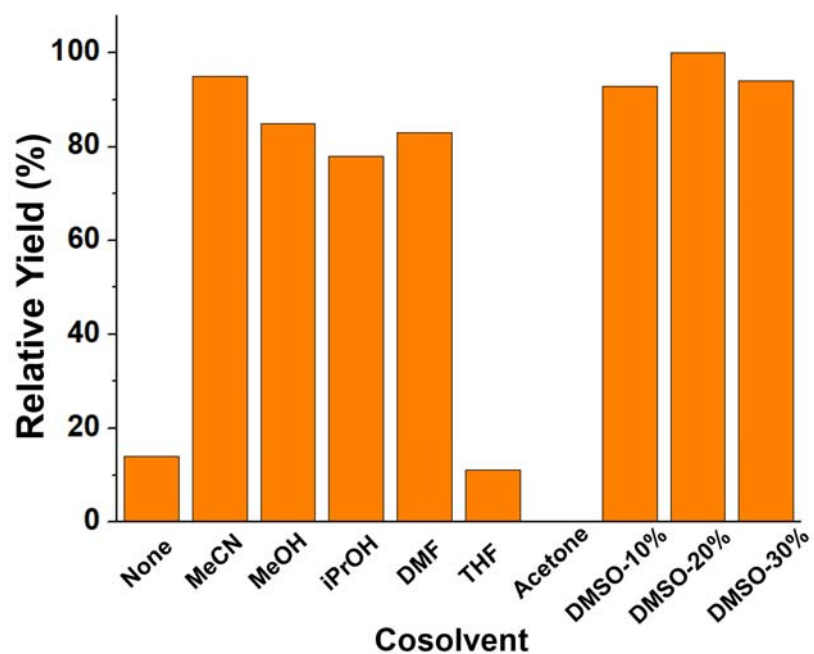

**Supplementary Fig. 1. Dependence of cosolvent in the CvFAP catalyzed decarboxylative deuteration.** Reaction conditions: palmitic acid (0.40 mmol), crude enzyme powder (containing CvFAP about 20 mg), D<sub>2</sub>O (4 mL), cosolvent (1 mL), 450 nm LED, 20 °C, 2 h, yields are determined by GC.

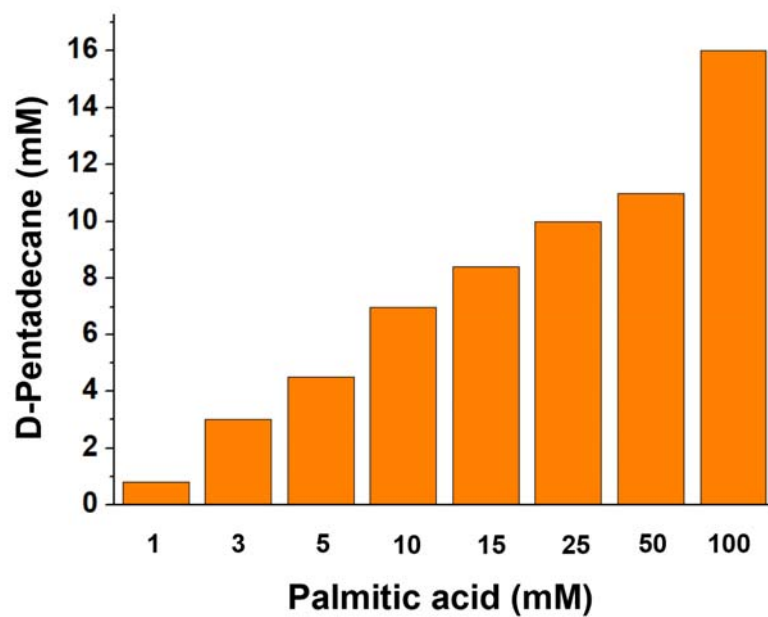

**Supplementary Fig. 2. The effect of substrate concentration on the CvFAP catalyzed decarboxylative deuteration.**

Reaction conditions: palmitic acid (1-100 mM), crude enzyme powder (containing CvFAP about 20 mg), D<sub>2</sub>O (4 mL), DMSO (1 mL), 450 nm LED, 20°C, 2 h. Yields are determined by GC.

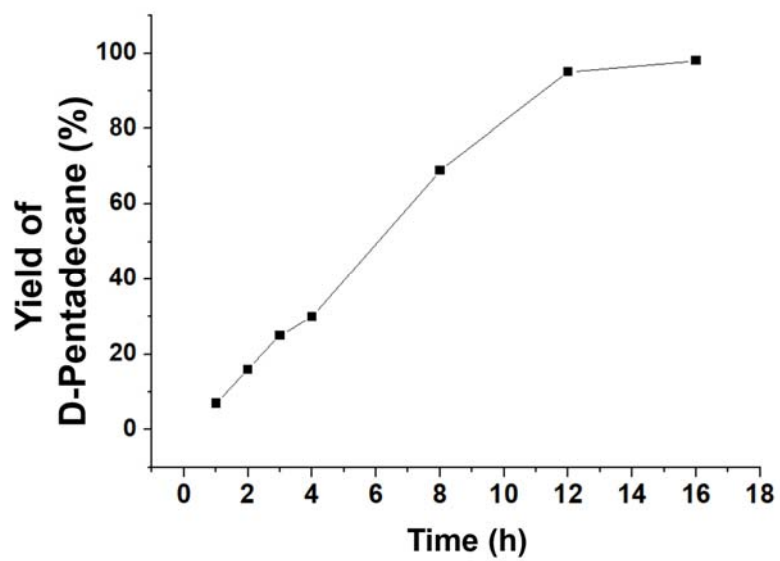

**Supplementary Fig. 3. The progress curve of CvFAP catalyzed decarboxylative deuteration.** Reaction conditions: palmitic acid (100 mM), crude enzyme powder (containing CvFAP about 20 mg), D<sub>2</sub>O (4 mL), DMSO (1 mL), 450 nm LED, 20 °C, 1-16 h, yields are determined by GC.

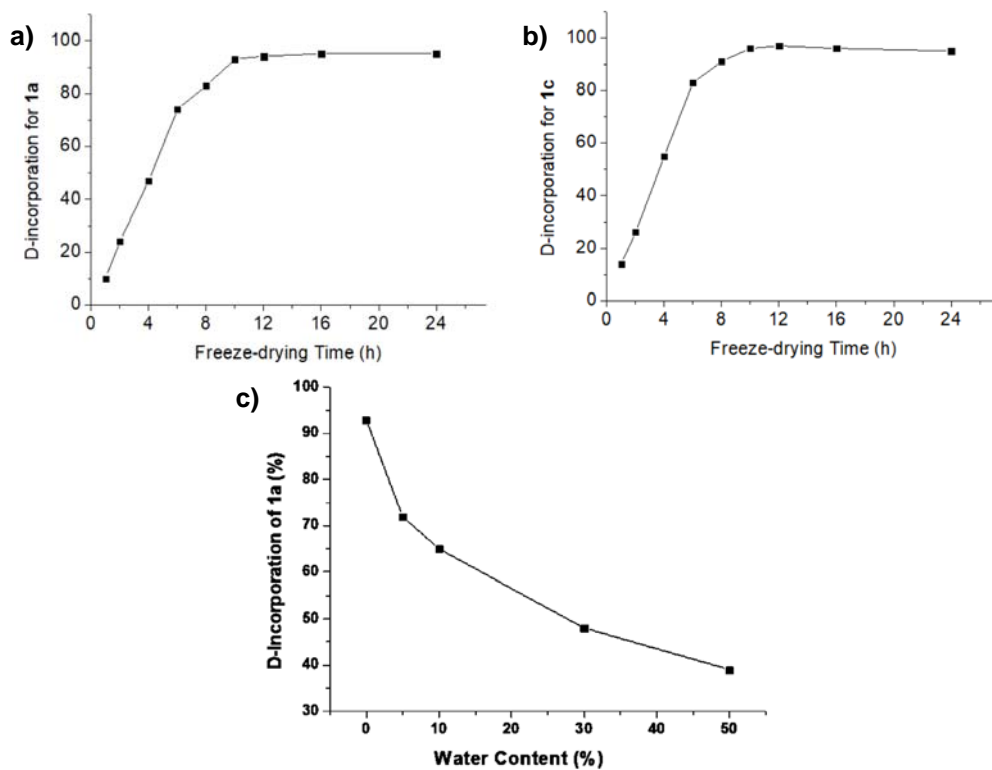

**Supplementary Fig. 4. Effect of water content in the enzyme system on the D- incorporation.** a) the D- incorporation of **1a** obtained from WT CvFAP treated with different freeze-drying time. b) the D- incorporation of **1c** obtained from WT CvFAP treated with different freeze-drying time. c) Effect of water content in WT CvFAP on the D- incorporation of **1a**. Reaction conditions: substrate (0.40 mmol), crude enzyme powder (containing CvFAP about 20 mg), D<sub>2</sub>O (4 mL), DMSO (1 mL), 450 nm LED, 20 °C, 12 h, yields are determined by GC. D-inc. data are determined by <sup>1</sup>H NMR or HRMS.

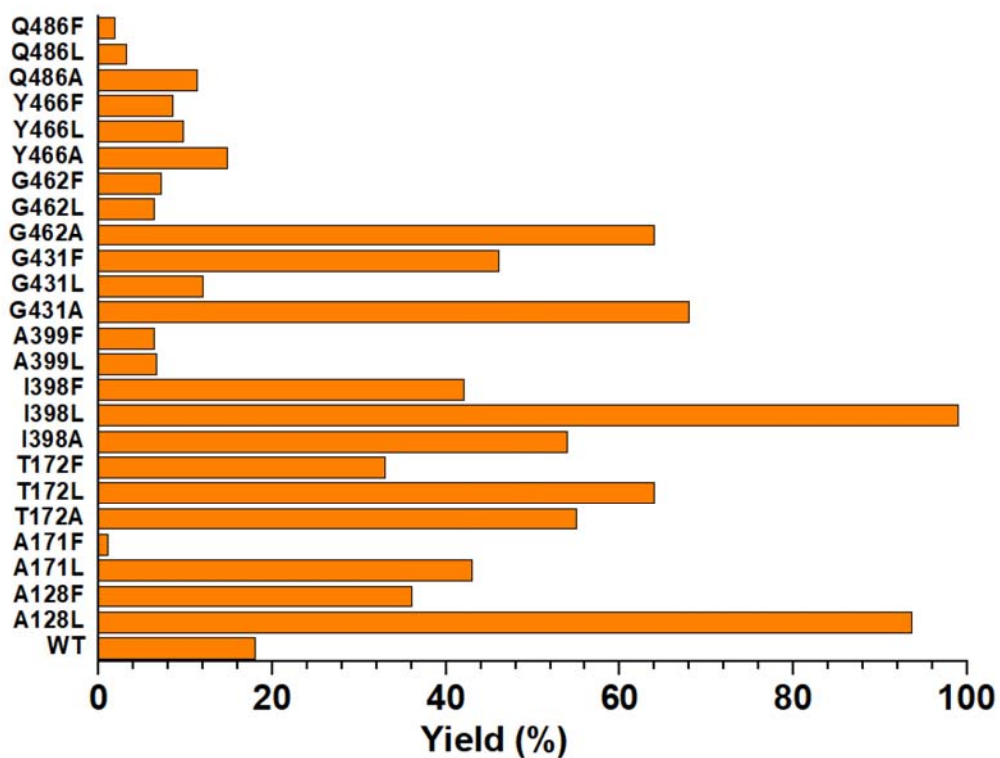

**Supplementary Fig. 5. Screening results of the FRISM library using the model decarboxylation of nonanoic acid.**

Reaction conditions: nonanoic acid (0.02 mmol), 1 mL crude enzyme solutions of different mutants (1 g wet cell in 10 mL pH 8.5 phosphate buffer), DMSO (0.2 mL), 450 nm LED, 20 °C, 12 h, yields are determined by GC.

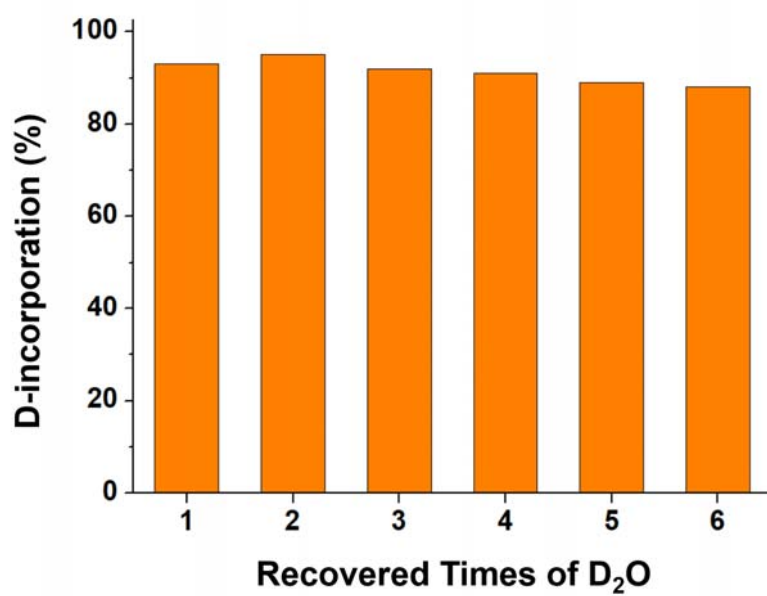

**Supplementary Fig. 6. Recovered times of D<sub>2</sub>O in the CvFAP catalyzed decarboxylative deuteration.** D<sub>2</sub>O was recovered by vacuum distillation. Reaction conditions: palmitic acid (100 mM), crude enzyme powder (containing CvFAP about 20 mg), D<sub>2</sub>O (4 mL), DMSO (1 mL), 450 nm LED, 20 °C, 12 h, yield is determined by GC, D-inc. was determined by HRMS.



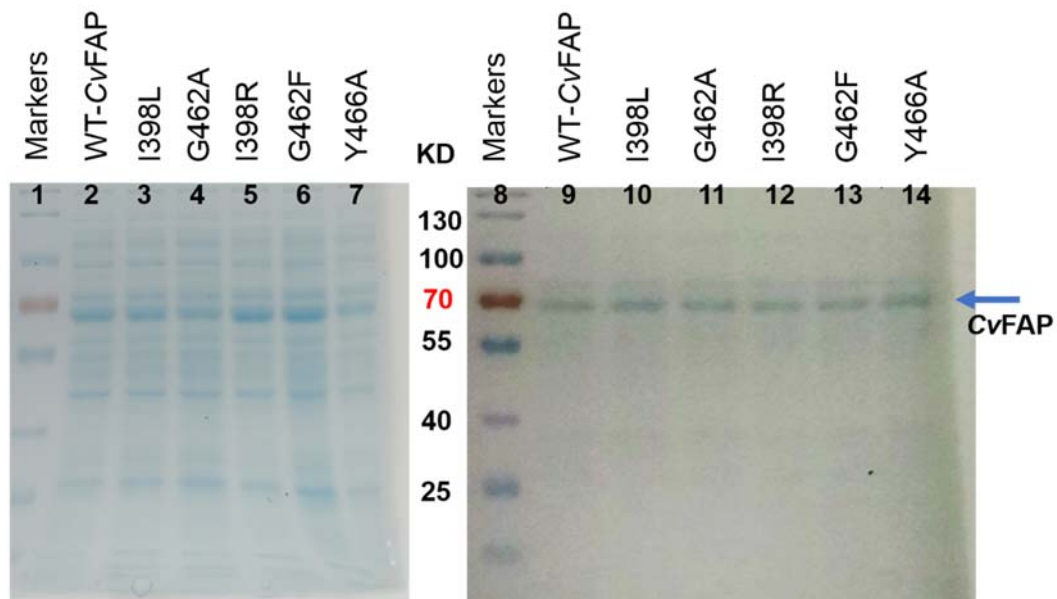

**Supplementary Fig. 7 SDS-PAGE of WT-CvFAP and mutants expressed in *E. coli*.** Lane 1 and 8: protein markers. Lane 2-7: cell extract of WT CvFAP, I398L, G462A, I398R, G462F, and Y466A. Lane 9-14: protein of WT CvFAP, I398L, G462A, I398R, G462F, and Y466A after purification. Three experiment was repeated independently with similar results.

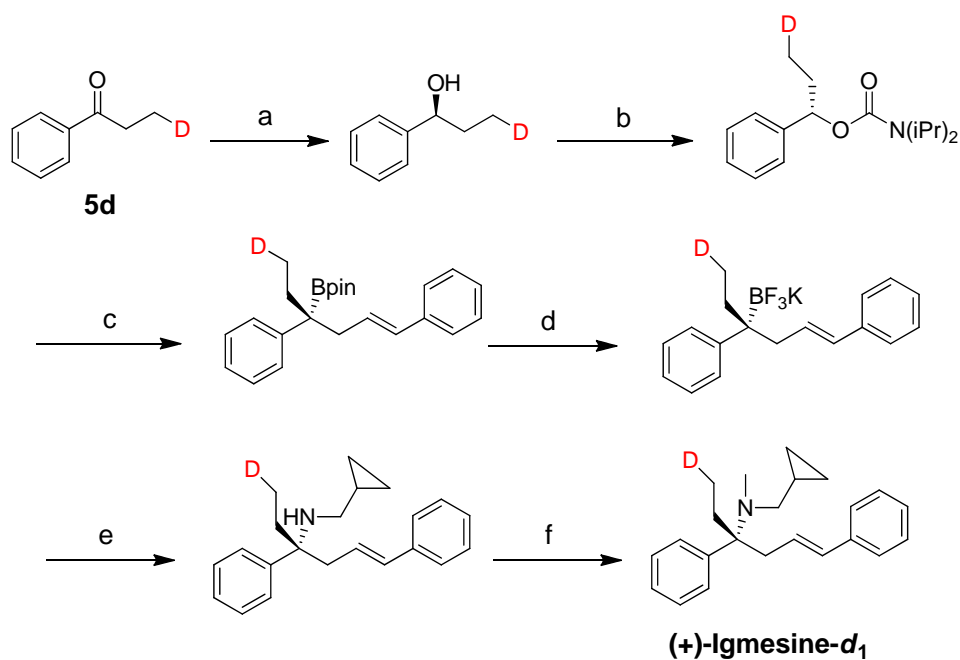

**Supplementary Fig. 8. Derivatization of 5d to (+)-Igmesine-*d*<sub>1</sub> with reported methods.<sup>1,2</sup>** Reagents and conditions: a) whole-cell culture medium of ketoreductase with glucose, 30 °C, over night; b)  $i\text{Pr}_2\text{NCOCl}$  (1.05 equiv),  $\text{NEt}_3$  (1.1 equiv),  $\text{CH}_2\text{Cl}_2$ , reflux, 24 h; c) *sec*-butyllithium (1.1 equiv),  $-78^\circ\text{C}$ , 20 min; then cinnamyl boronic acid pinacol ester (1.2 equiv),  $-78^\circ\text{C}$ , 1 h; then 1M  $\text{MgBr}_2$  in MeOH (1.2 equiv),  $-78^\circ\text{C}$ , 10 min, then RT, 16 h; then 1M aq  $\text{KH}_2\text{PO}_4$ ; d) 4.5m aq  $\text{KHF}_2$  (2.5 equiv), MeOH, RT, 30 min, evaporation; then 50% aq MeOH, 10 min and evaporation (5x); e)  $\text{SiCl}_4$ , (2 equiv), DCE, RT, 1 h;  $c\text{PrCH}_2\text{N}_3$  (2 equiv),  $80^\circ\text{C}$ , 30 min; then 2M aq NaOH, RT, 1 h; f) 37% aq  $\text{CH}_2\text{O}$ ,  $\text{NaHB(OAc)}_3$ , DCE, RT, 16 h.

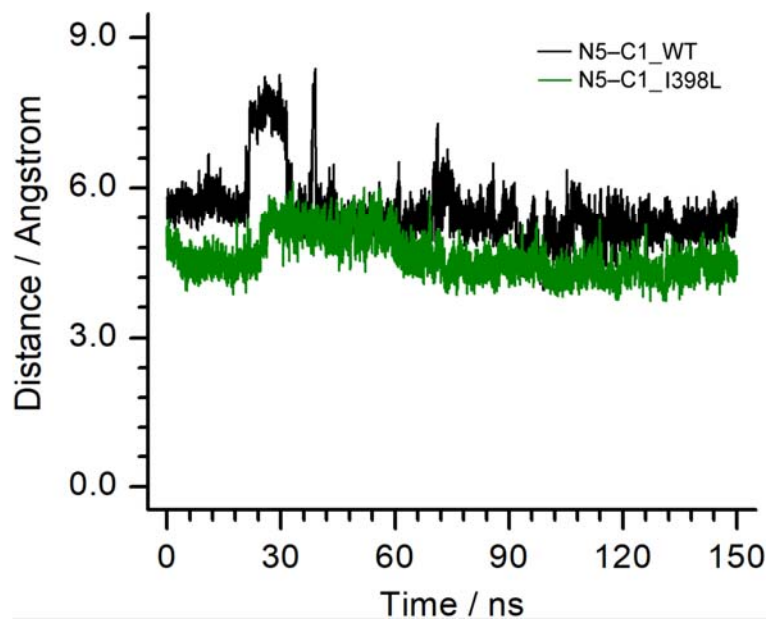

Supplementary Fig. 9. Comparison of the distance between the carboxyl of nonanoic acid (2A) and the N5 atom of FAD in WT-CvFAP and I398L by MD simulation.

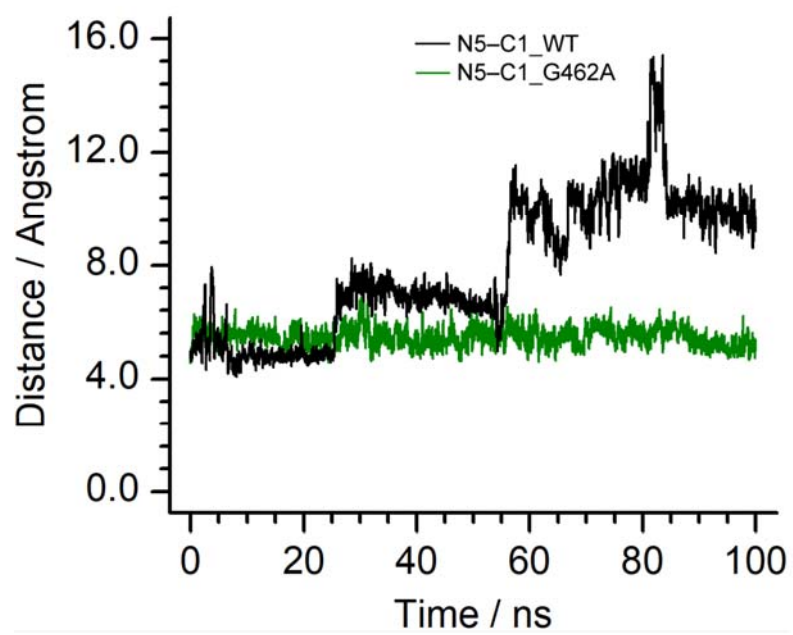

**Supplementary Fig. 10. Comparison of the distance between the carboxyl of propionic acid (3A) and the N5 atom of FAD in WT-CvFAP and G462A by MD simulation.**

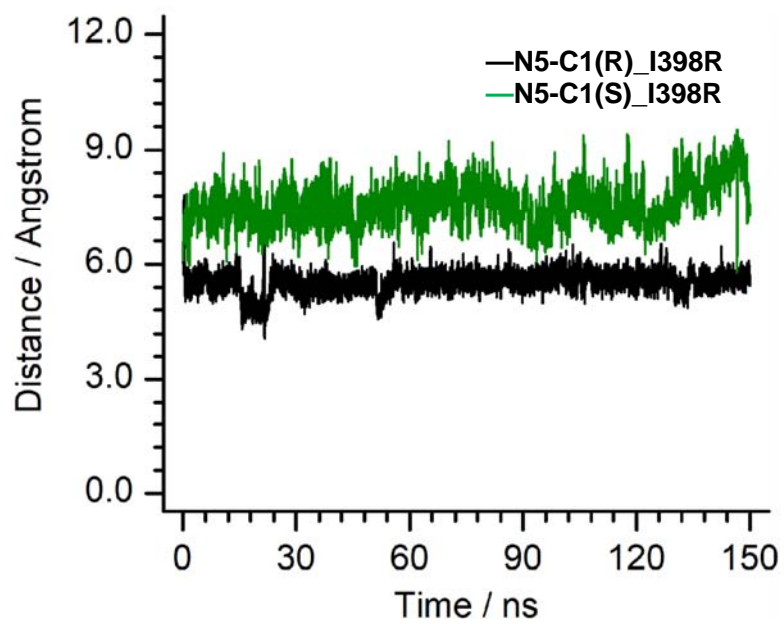

Supplementary Fig. 11. Comparison of the distance between the carboxyl of (*R*)- and (*S*)- 2-(heptan-3-yloxy) acetic acid (4A) and the N5 atom of FAD in I398R by MD simulation.

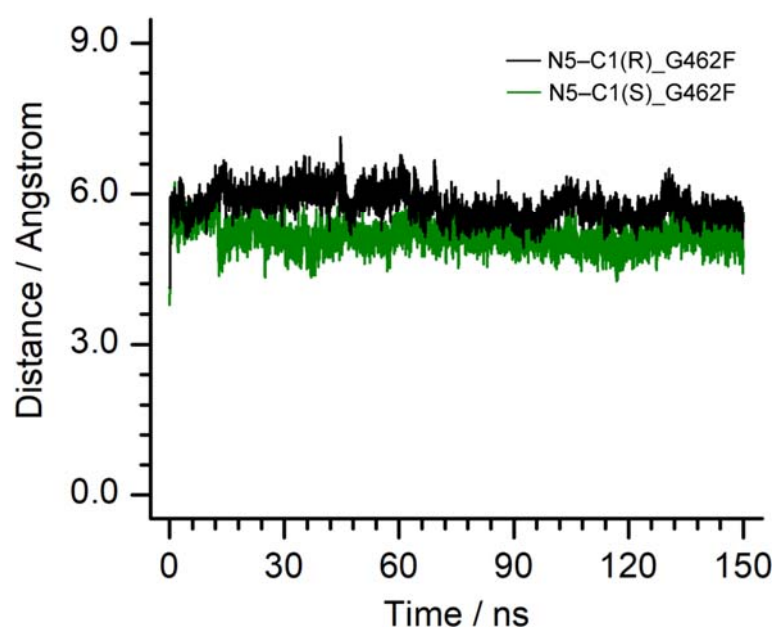

Supplementary Fig. 12. Comparison of the distance between the carboxyl of (*R*)- and (*S*)- 2-(heptan-3-yloxy) acetic acid (4A) and the N5 atom of FAD in G462F by MD simulation.

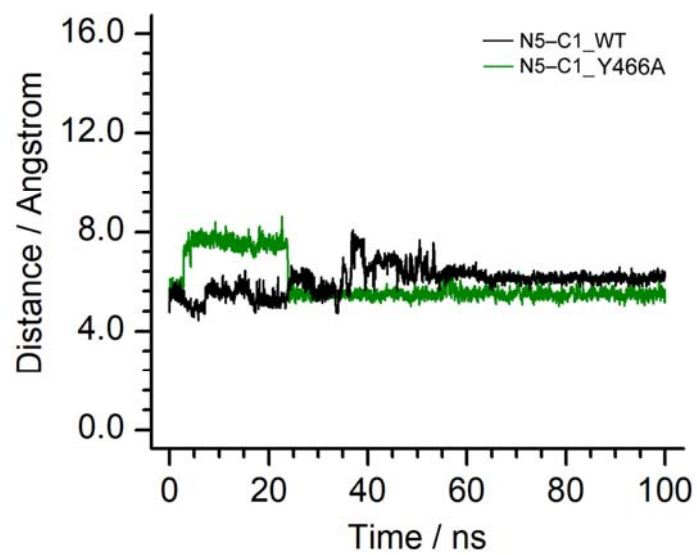

**Supplementary Fig. 13.** Comparison of the distance between the carboxyl of (*S*)- 3-phenylbutanoic acid ((*S*)-5A) and the N5 atom of FAD in WT-C $\nu$ FAP and Y466A by MD simulation.

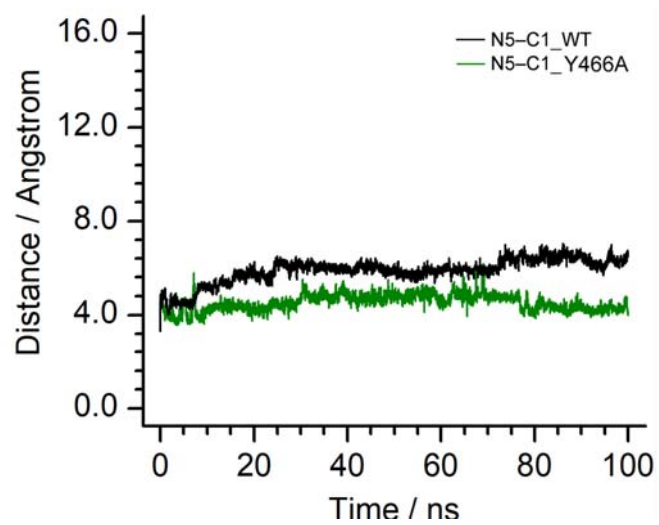

**Supplementary Fig. 14.** Comparison of the distance between the carboxyl of (*R*)- 3-phenylbutanoic acid (*(R)*-5A) and the N5 atom of FAD in WT-CvFAP and Y466A by MD simulation.



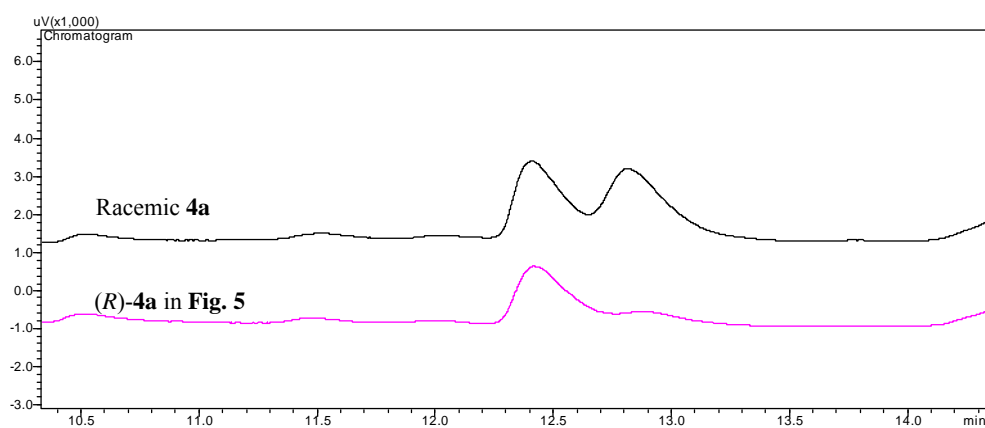

**Supplementary Fig. 15. Chiral GC chromatogram of the enantioselective decarboxylative deuteration of 4a.**

Agilent CP-chirasil-Dex CB,  $T_R = 12.47$  min,  $T_S = 12.87$  min, Temperature conditions: initial temperature 40 °C, holding 15 min, then 40 °C/min to 200 °C, holding 1 min.

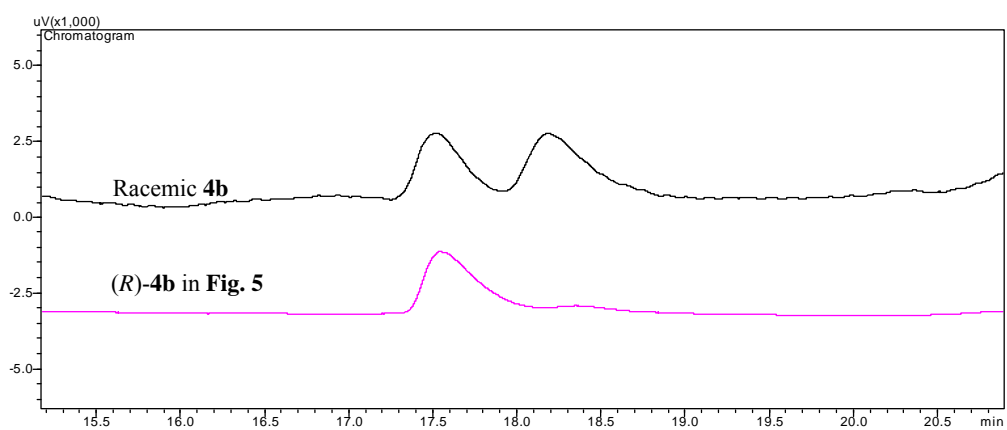

**Supplementary Fig. 16. Chiral GC chromatogram of the enantioselective decarboxylative deuteration of 4b.**

Agilent CP-chirasil-Dex CB,  $T_R = 17.52$  min,  $T_S = 18.19$  min, Temperature conditions: initial temperature 40 °C, holding 20 min, then 40 °C/min to 200 °C, holding 1 min

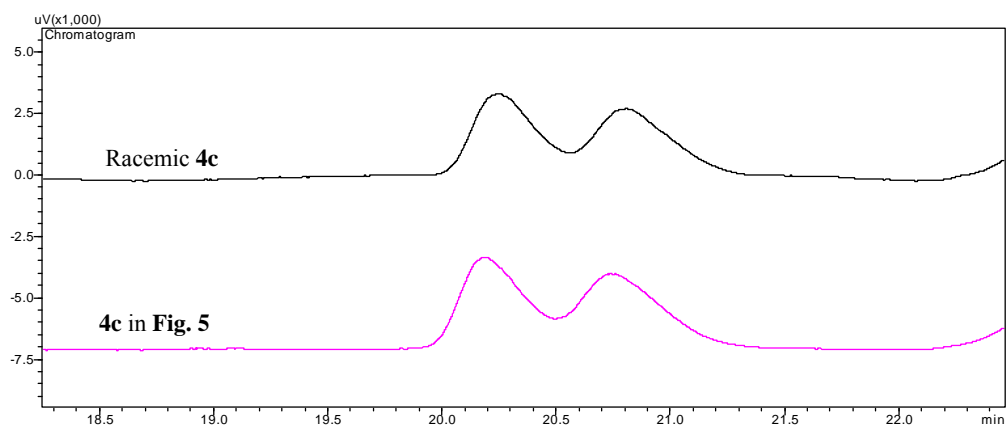

**Supplementary Fig. 17. Chiral GC chromatogram of the enantioselective decarboxylative deuteration of 4c.**

Agilent CP-chirasil-Dex CB,  $T_R = 20.21$  min,  $T_S = 20.75$  min, Temperature conditions: initial temperature 50 °C, holding 22 min, then 40 °C/min to 200 °C, holding 1 min.

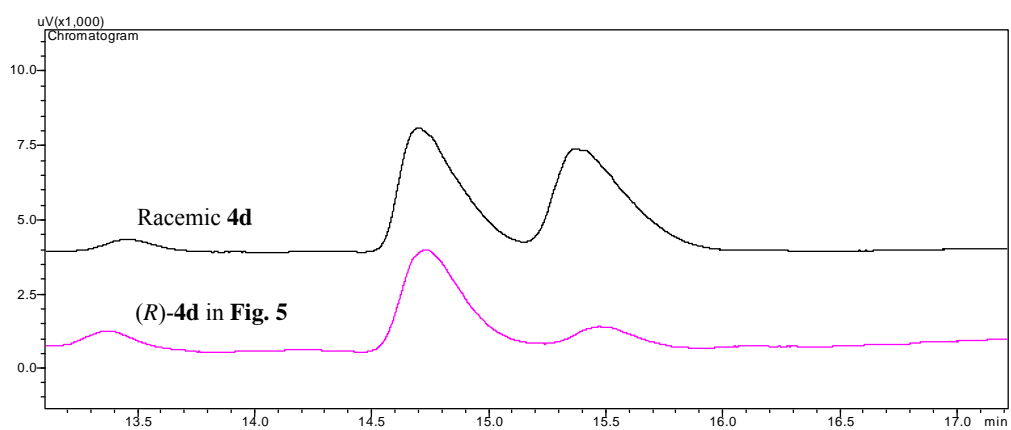

**Supplementary Fig. 18. Chiral GC chromatogram of the enantioselective decarboxylative deuteration of 4d.**

Agilent CP-chirasil-Dex CB,  $T_R = 14.77$  min,  $T_S = 15.46$  min, Temperature conditions: initial temperature 40 °C, holding 20 min, then 40 °C/min to 200 °C, holding 1 min.

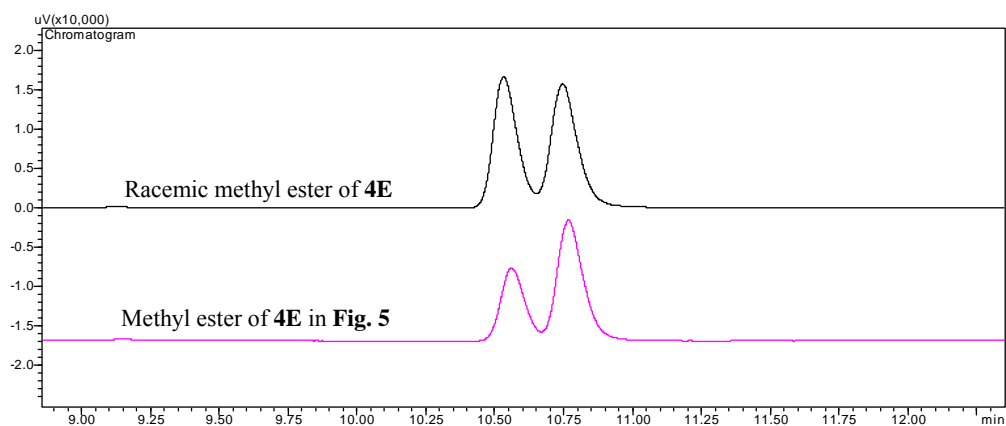

**Supplementary Fig. 19. Chiral GC chromatogram of the enantioselective decarboxylative deuteration of 4E.**

Agilent CP-chirasil-Dex CB,  $T_R = 10.58$  min,  $T_S = 10.79$  min, Temperature conditions: initial temperature 100 °C, 2 °C/min to 130 °C, then 35 °C/min to 200 °C, holding 1 min. The e.r. value of **4E** was determined after the sulfuric acid-catalyzed derivatization with methyl alcohol, and the e.r. value of **4e** was calculated based on the conversion and e.r. of **4E**.

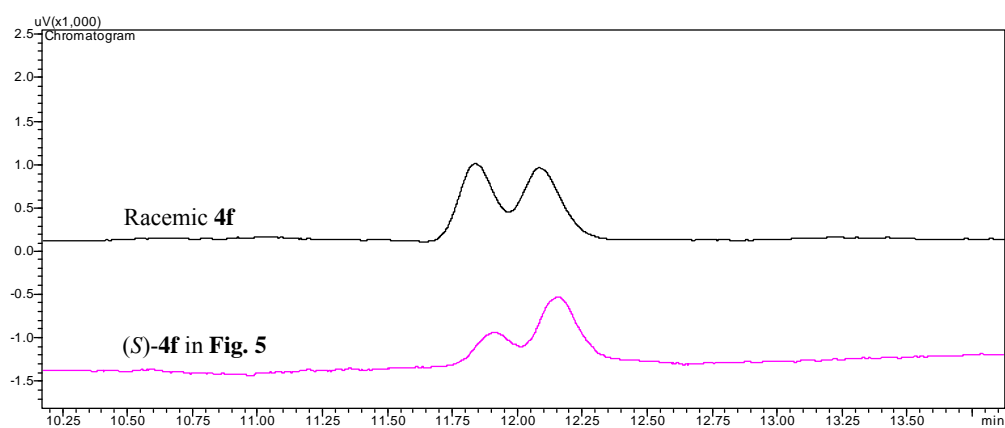

**Supplementary Fig. 20. Chiral GC chromatogram of the enantioselective decarboxylative deuteration of 4f.**

Agilent CP-chirasil-Dex CB,  $T_R = 11.91$  min,  $T_S = 12.16$  min, Temperature conditions: initial temperature 40 °C, holding 7 min, 1 °C /min to 50 °C, then 50 °C /min to 200 °C, holding 1 min.

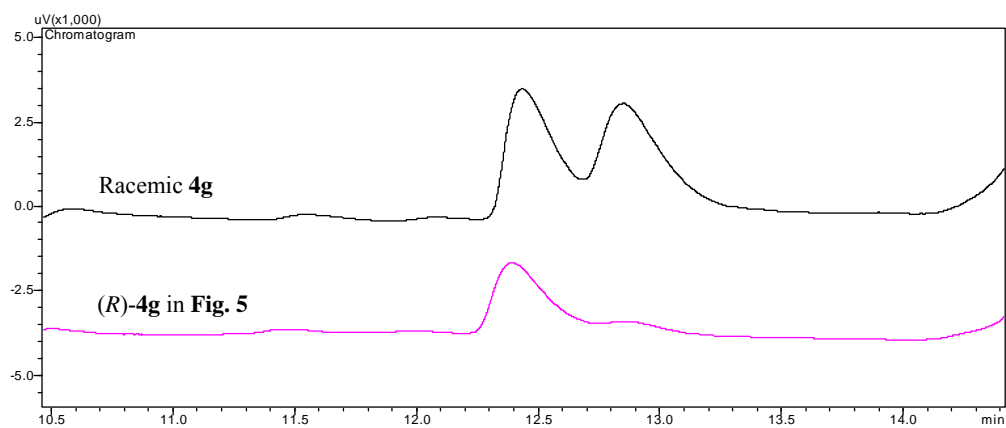

**Supplementary Fig. 21. Chiral GC chromatogram of the enantioselective decarboxylative deuteration of 4g.**

Agilent CP-chirasil-Dex CB,  $T_R = 12.47$  min,  $T_S = 12.87$  min, Temperature conditions: initial temperature 40 °C, holding 15 min, then 40 °C /min to 200 °C, holding 1 min.

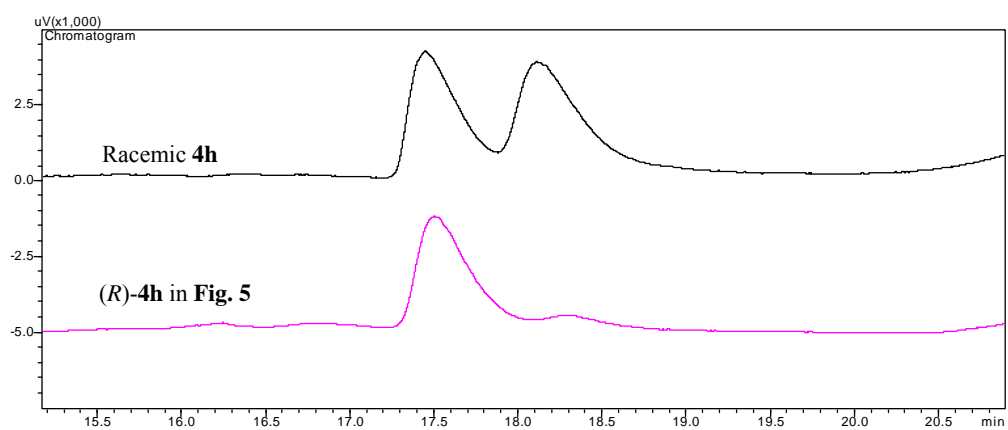

**Supplementary Fig. 22. Chiral GC chromatogram of the enantioselective decarboxylative deuteration of 4h.**

Agilent CP-chirasil-Dex CB,  $T_R = 17.53$  min,  $T_S = 18.20$  min, Temperature conditions: initial temperature 40 °C, holding 20 min, then 40 °C /min to 200 °C, holding 1 min.



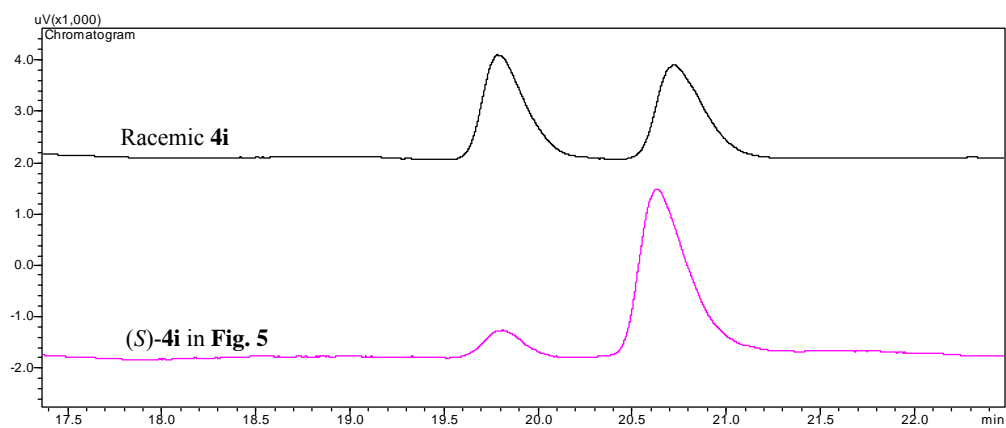

**Supplementary Fig. 23. Chiral GC chromatogram of the enantioselective decarboxylative deuteration of 4i.** Agilent CP-chirasil-Dex CB,  $T_R = 19.78$  min,  $T_S = 20.73$  min, Temperature conditions: initial temperature 50 °C, holding 8 min, then 50 °C /min to 200 °C, holding 1 min.

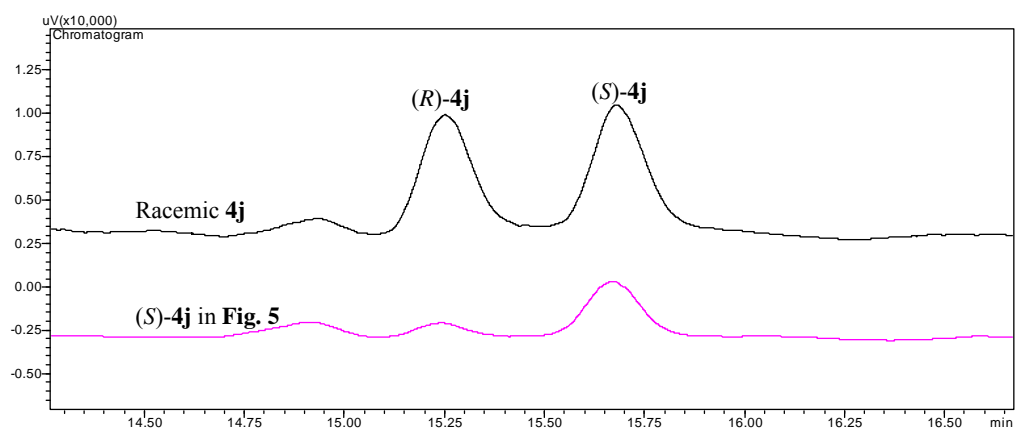

**Supplementary Fig. 24. Chiral GC chromatogram of the enantioselective decarboxylative deuteration of 4j.**

Agilent CP-chirasil-Dex CB,  $T_R = 15.24$  min,  $T_S = 15.67$ min, Temperature conditions: initial temperature 80 °C, holding 5 min, 2 °C /min to 110 °C, then 45 °C /min to 200 °C, holding 1 min. The e.r. value of 4j were determined after the derivatization with butyryl chloride.

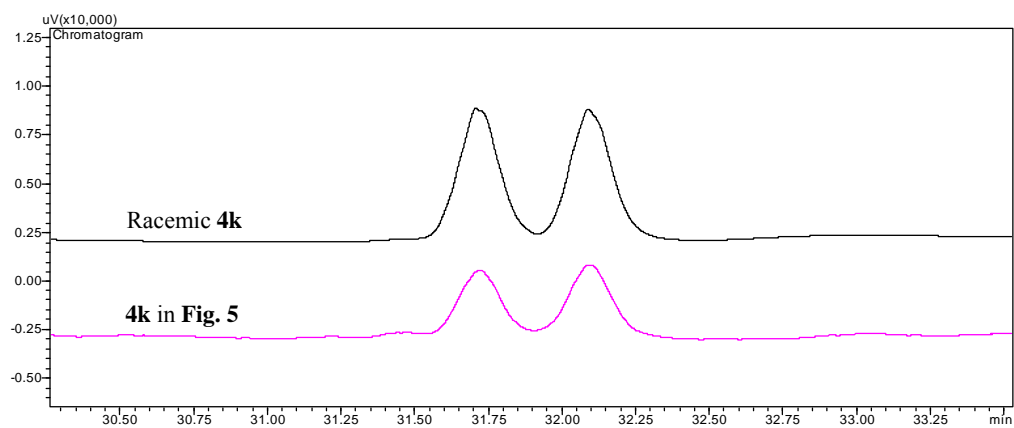

**Supplementary Fig. 25. Chiral GC chromatogram of the enantioselective decarboxylative deuteration of 4k.**

Agilent CP-chirasil-Dex CB,  $T_R = 31.73$  min,  $T_S = 32.11$  min. Temperature conditions: initial temperature 80 °C, holding 5 min, 5 °C /min to 160 °C, then 40 °C /min to 200 °C, holding 1 min. The e.r. value of **4k** were determined after the derivatization with butyryl chloride.

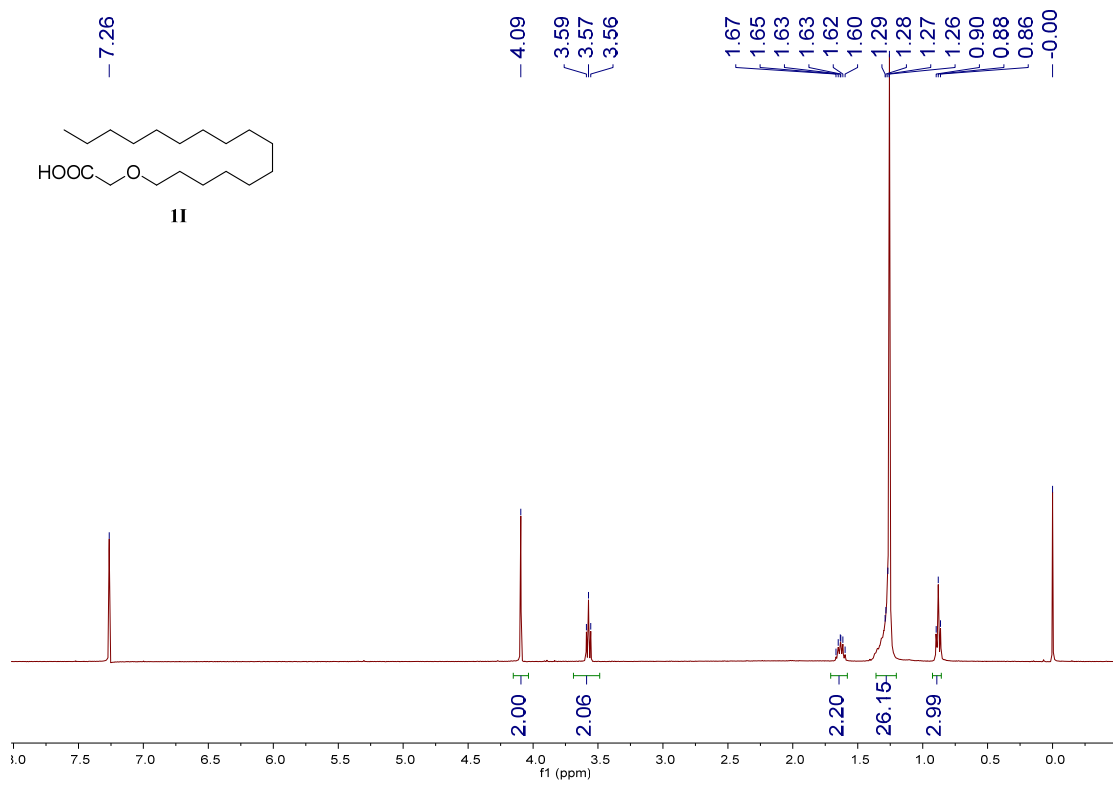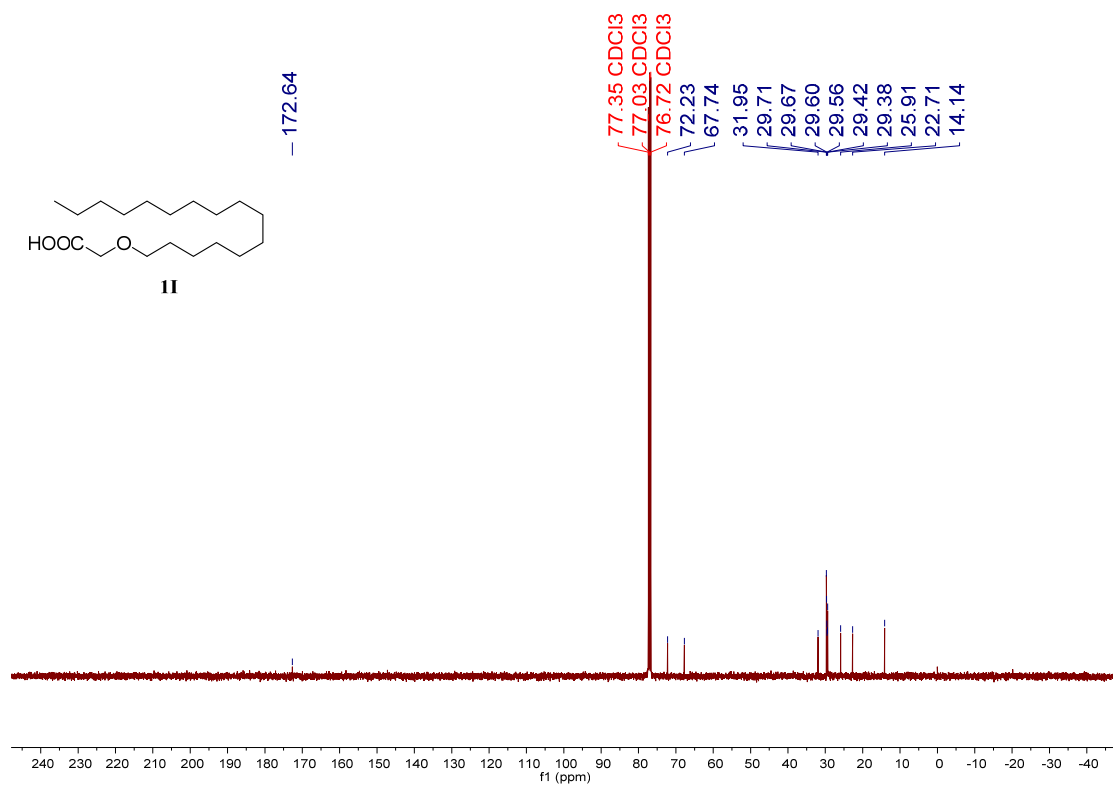

Supplementary Fig. 26. NMR spectra of 2-(Hexadecyloxy)acetic acid (II).

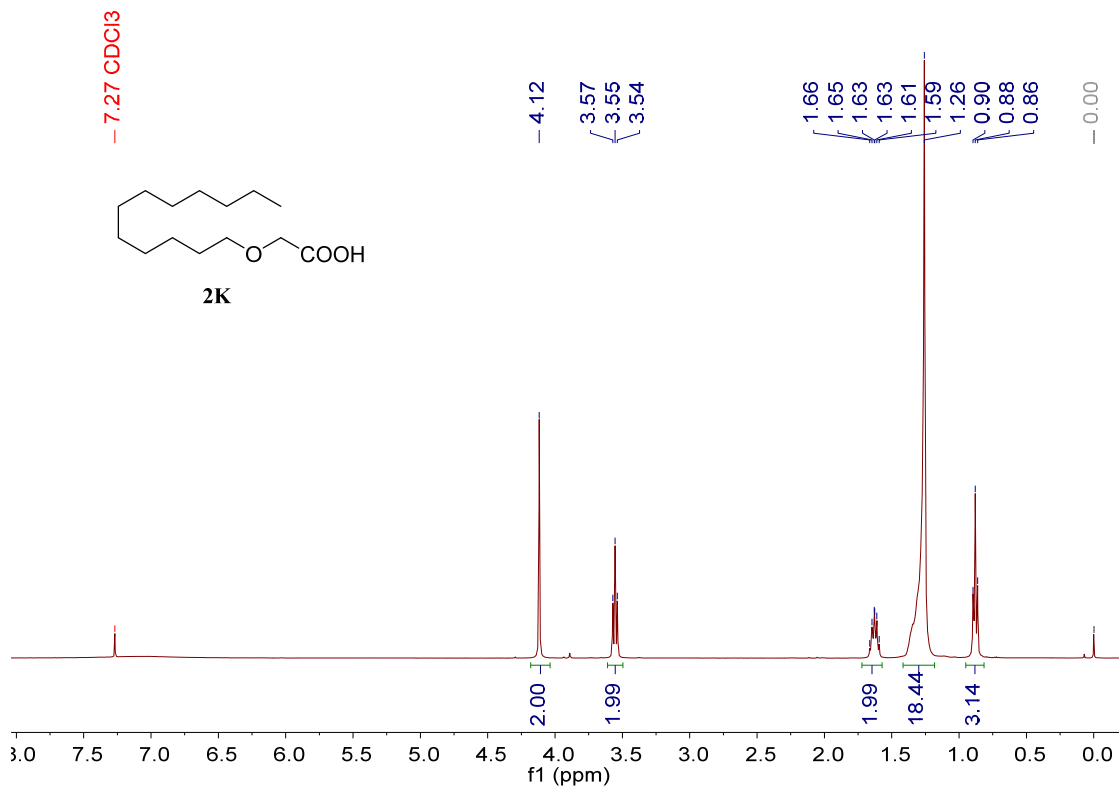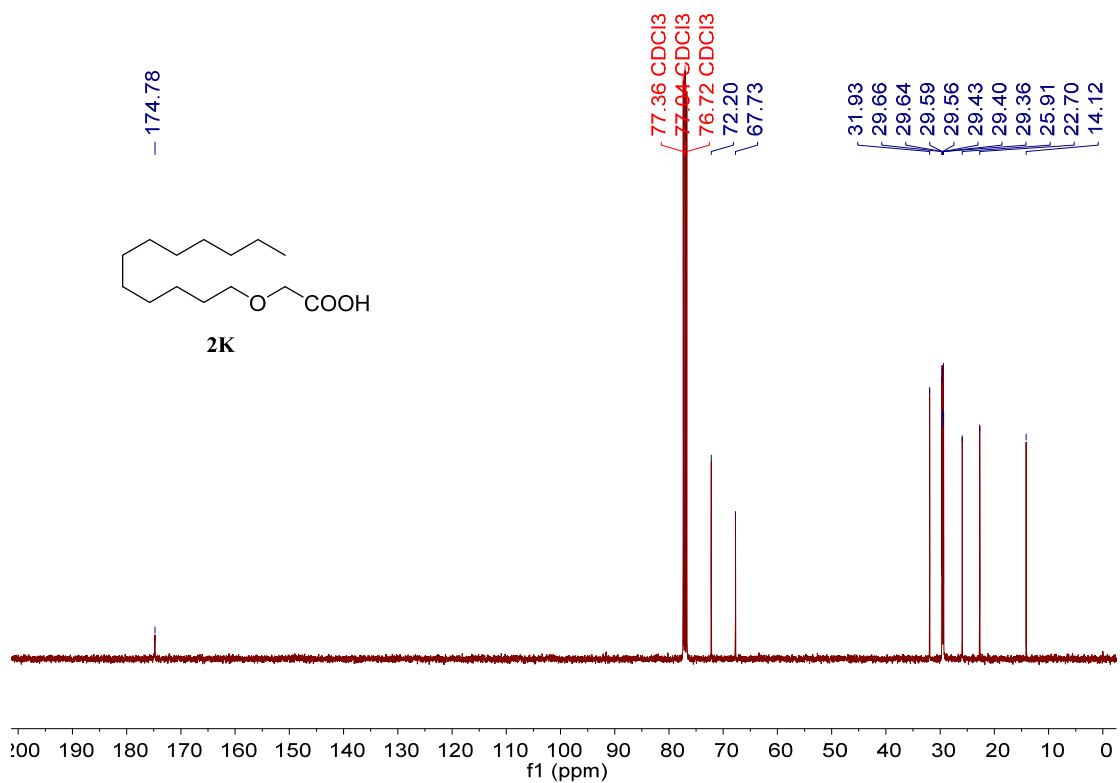

Supplementary Fig. 27. NMR spectra of 2-(Dodecyloxy)acetic acid (2K).

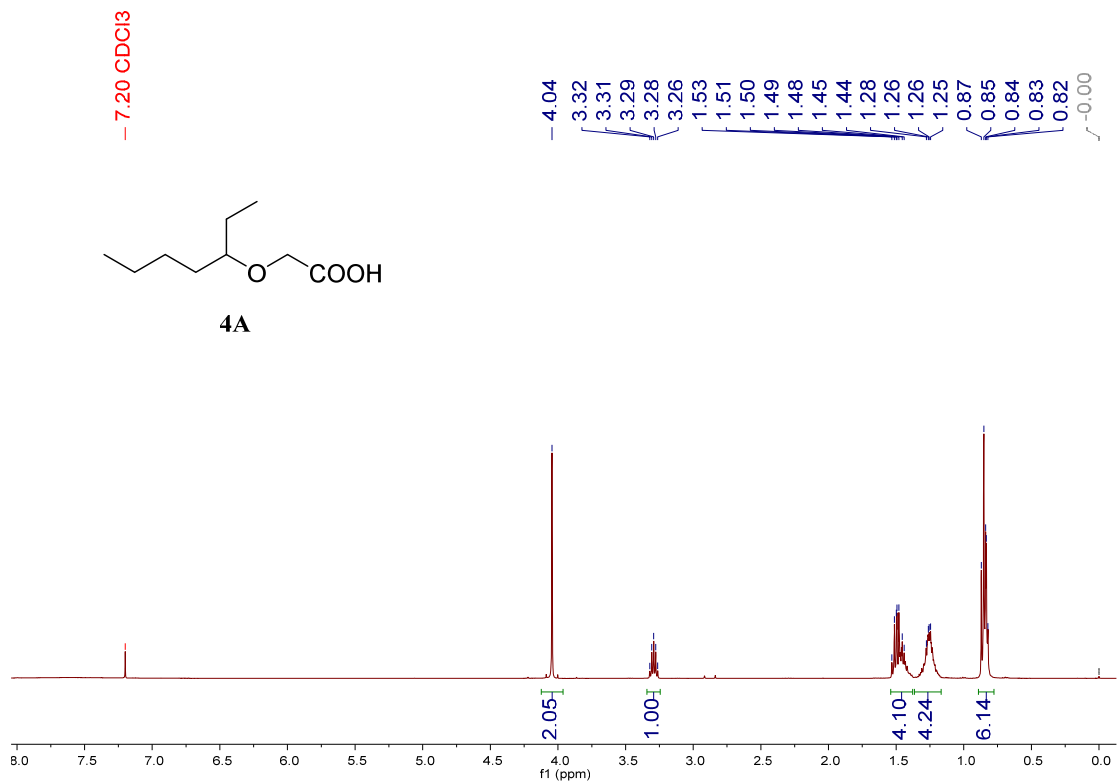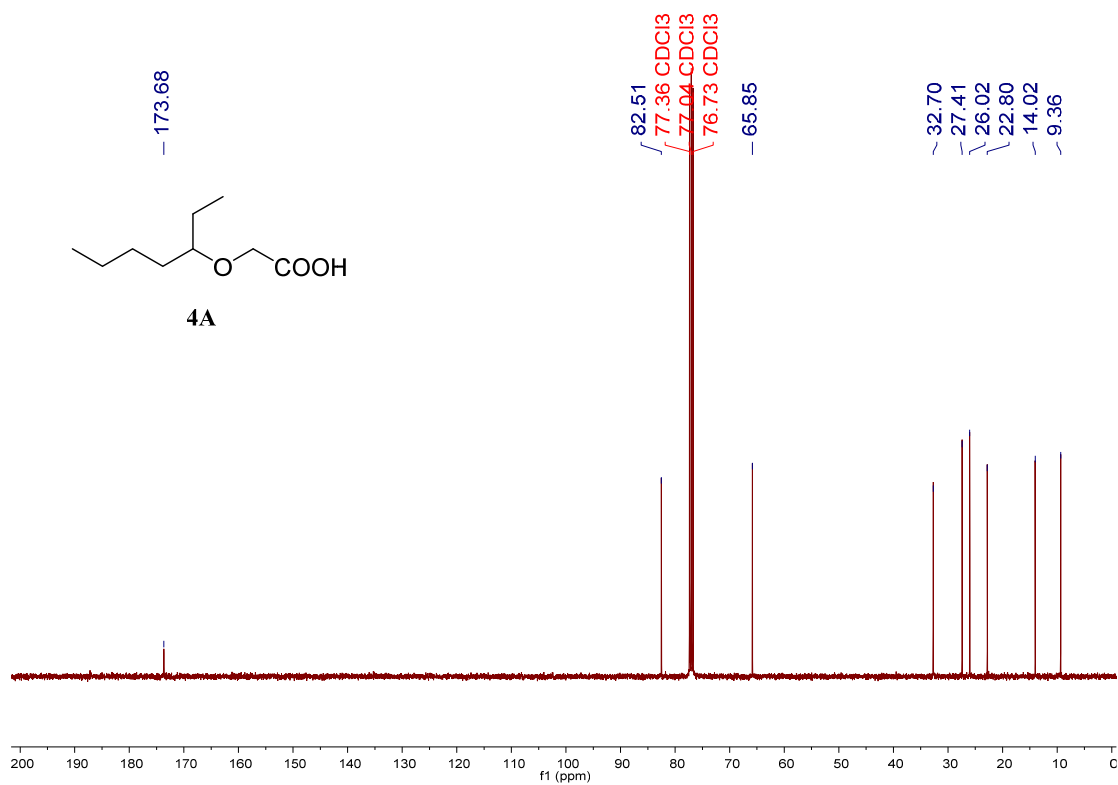

Supplementary Fig. 28. NMR spectra of 2-(Heptan-3-yloxy)acetic acid (4A).

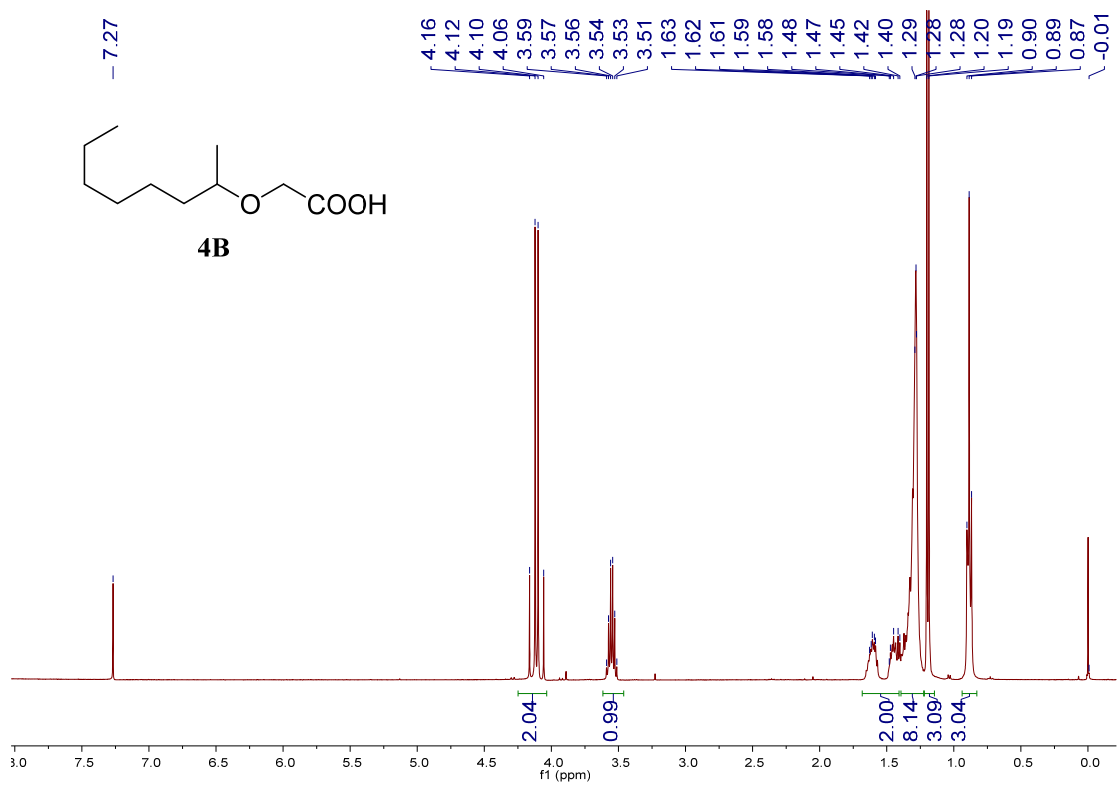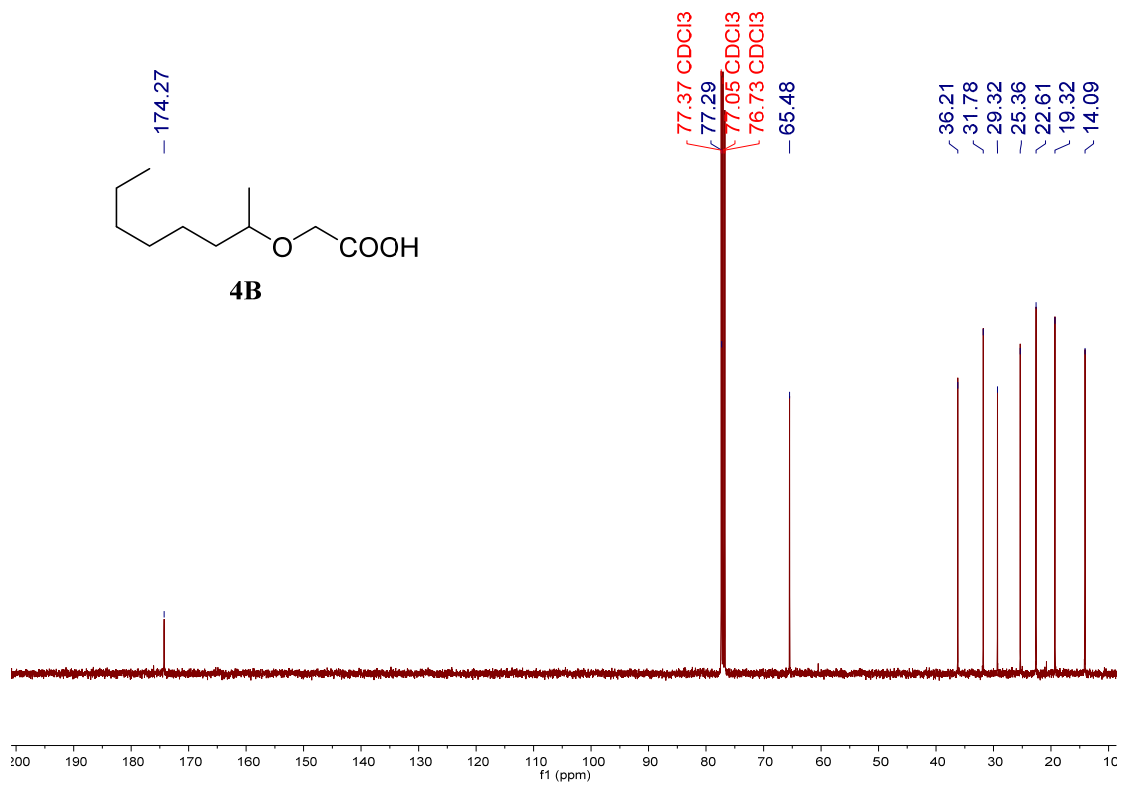

Supplementary Fig. 29. NMR spectra of 2-(Octan-2-yloxy)acetic acid (4B).

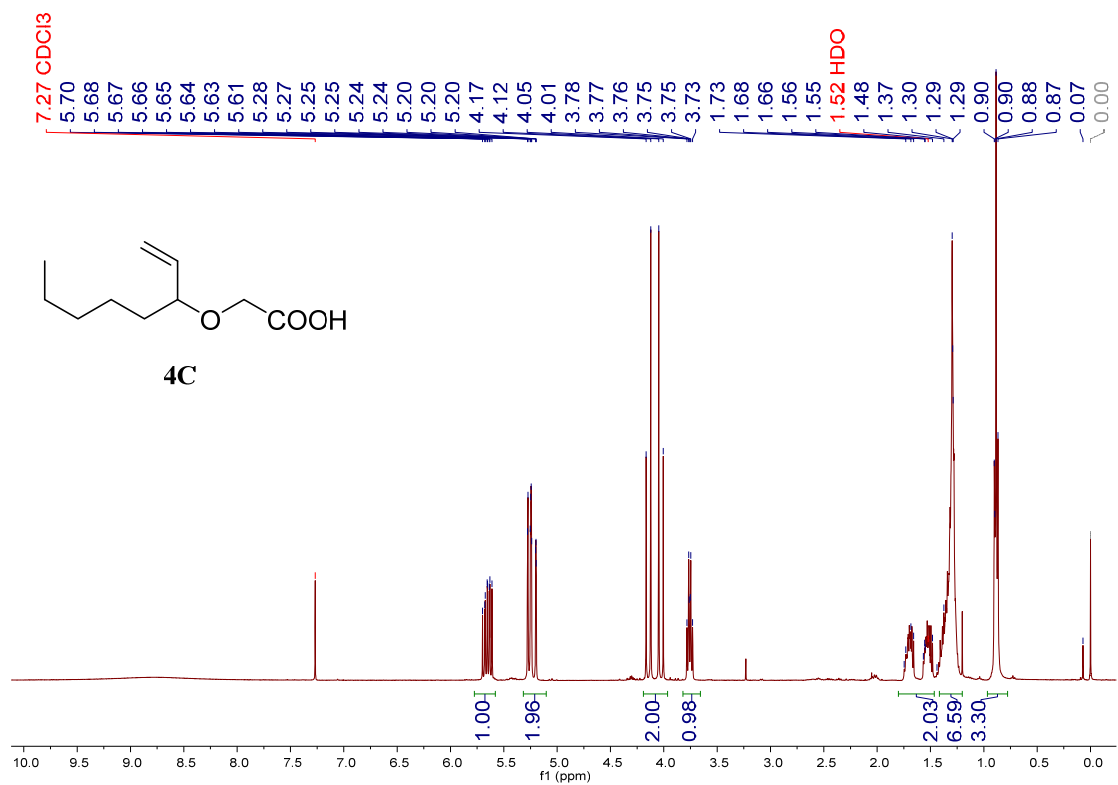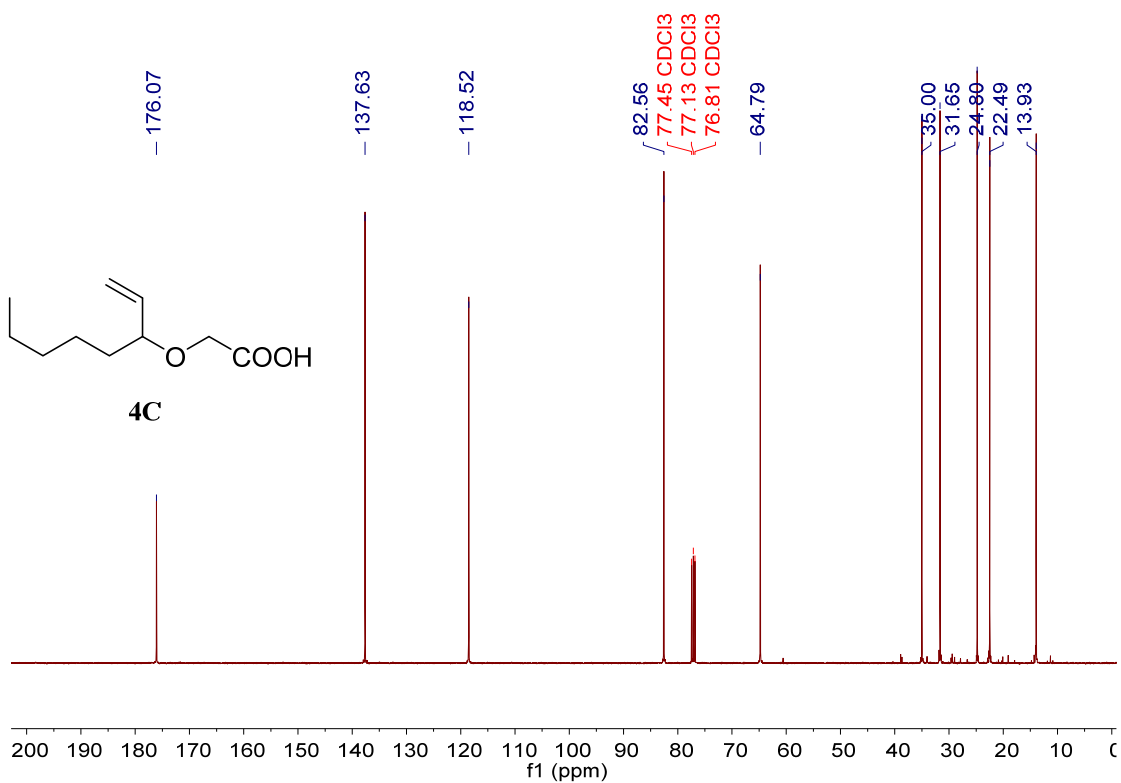

Supplementary Fig. 30. NMR spectra of 2-(Oct-1-en-3-yloxy)acetic acid (4C).



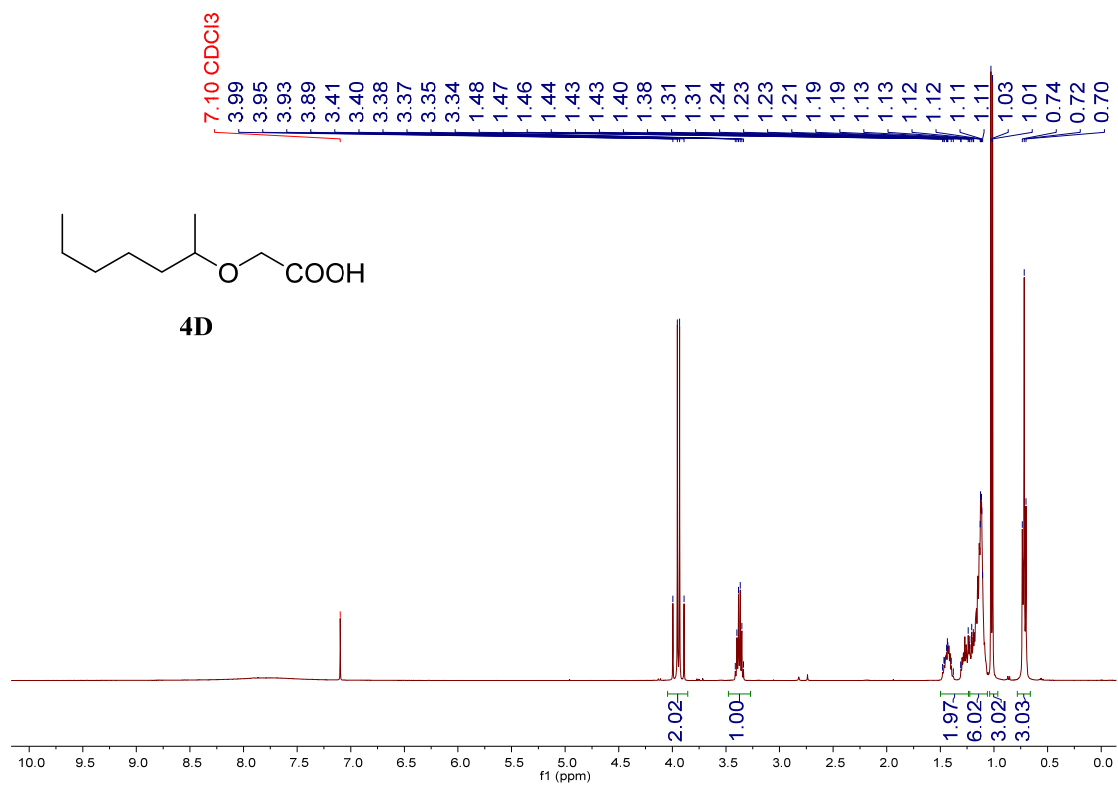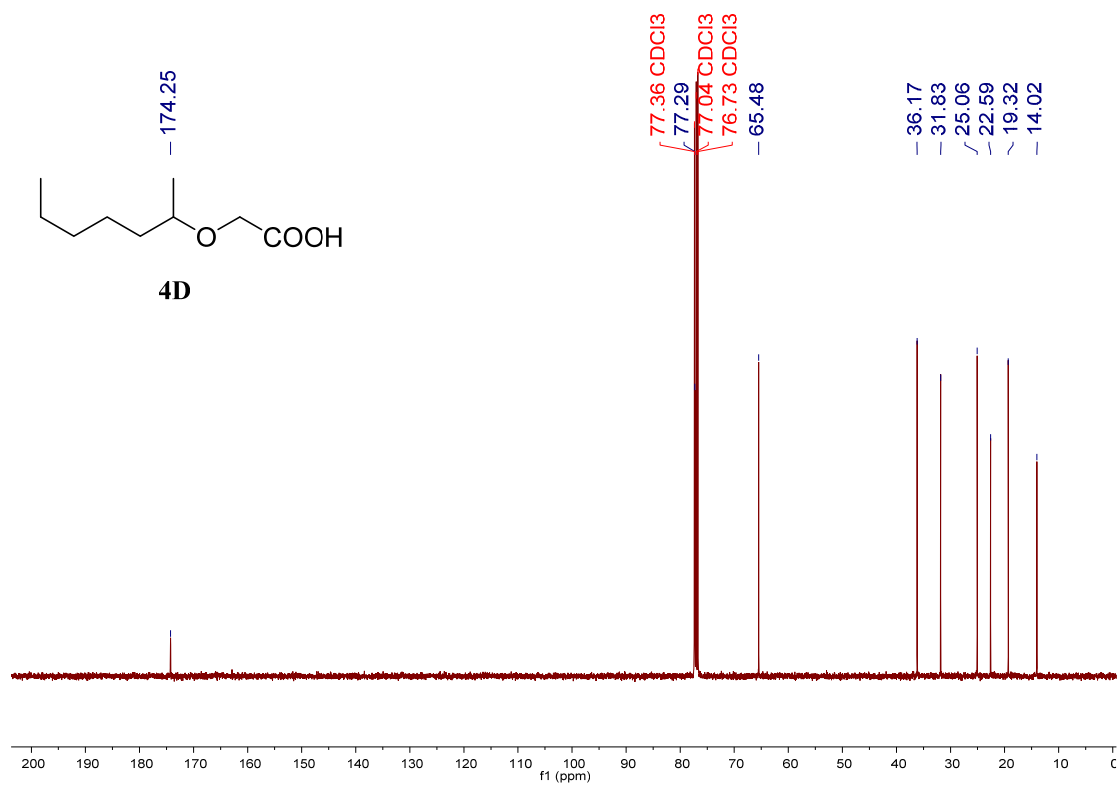

Supplementary Fig. 31. NMR spectra of 2-(heptan-2-yloxy)acetic acid (4D).

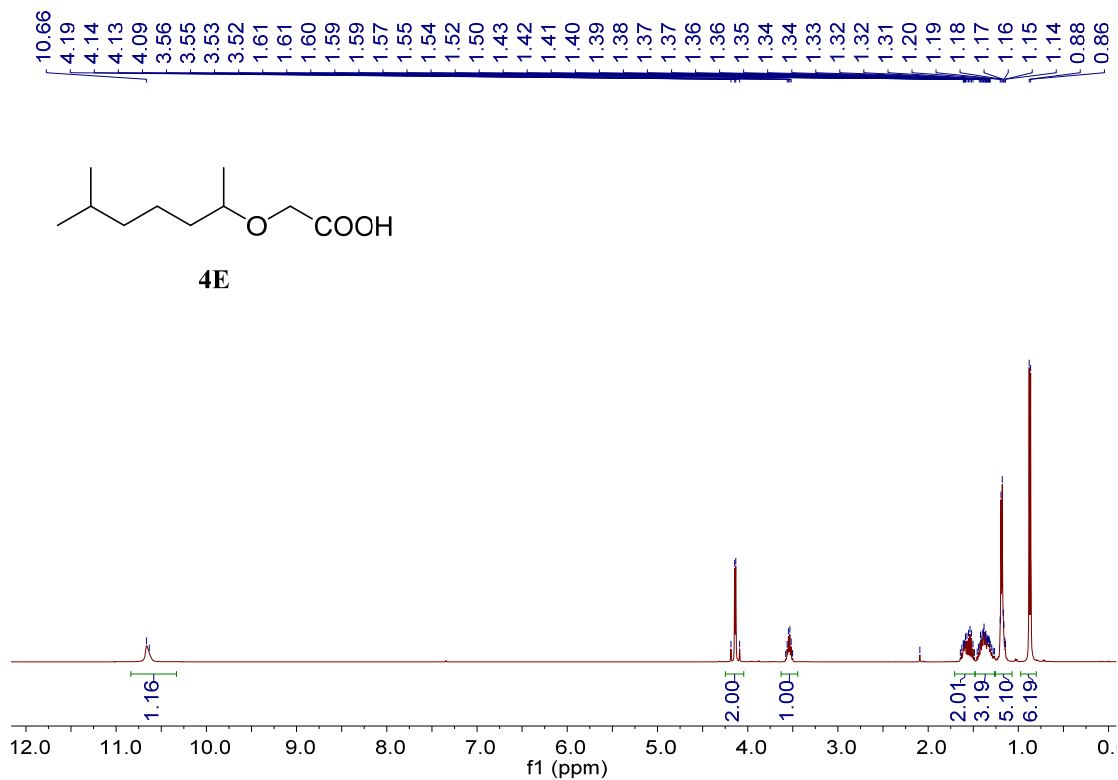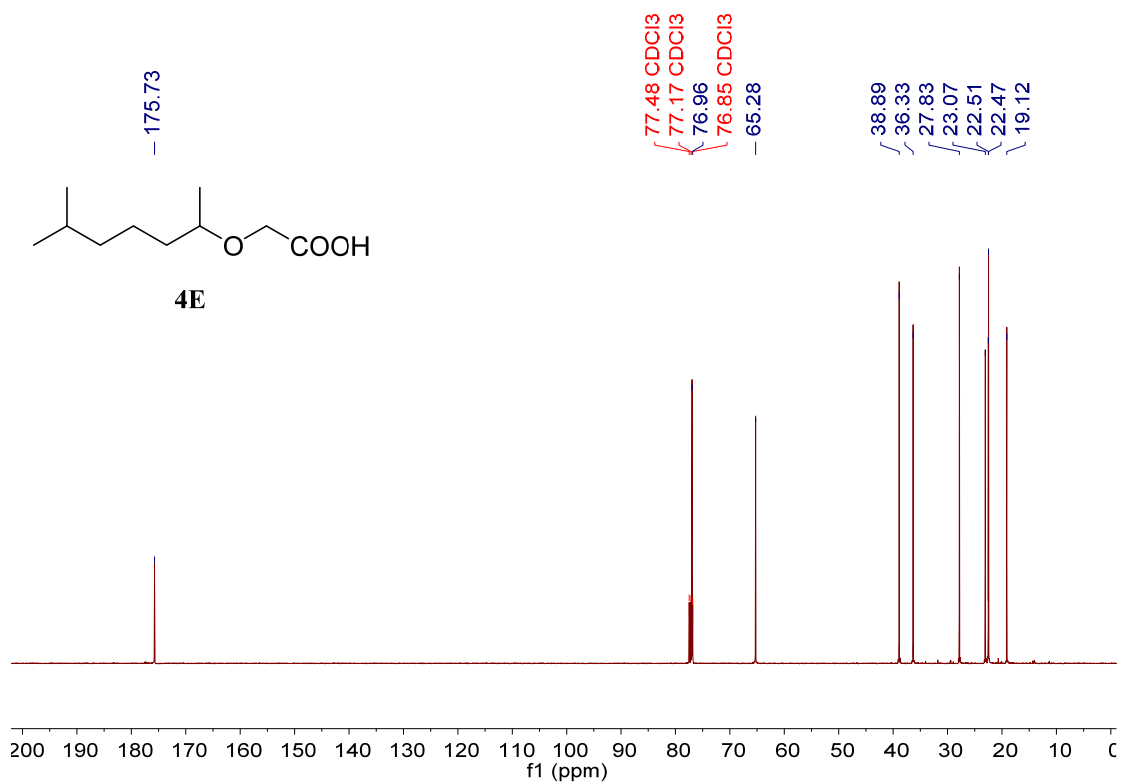

Supplementary Fig. 32. NMR spectra of 2-((6-Methylheptan-2-yl)oxy)acetic acid (4E).

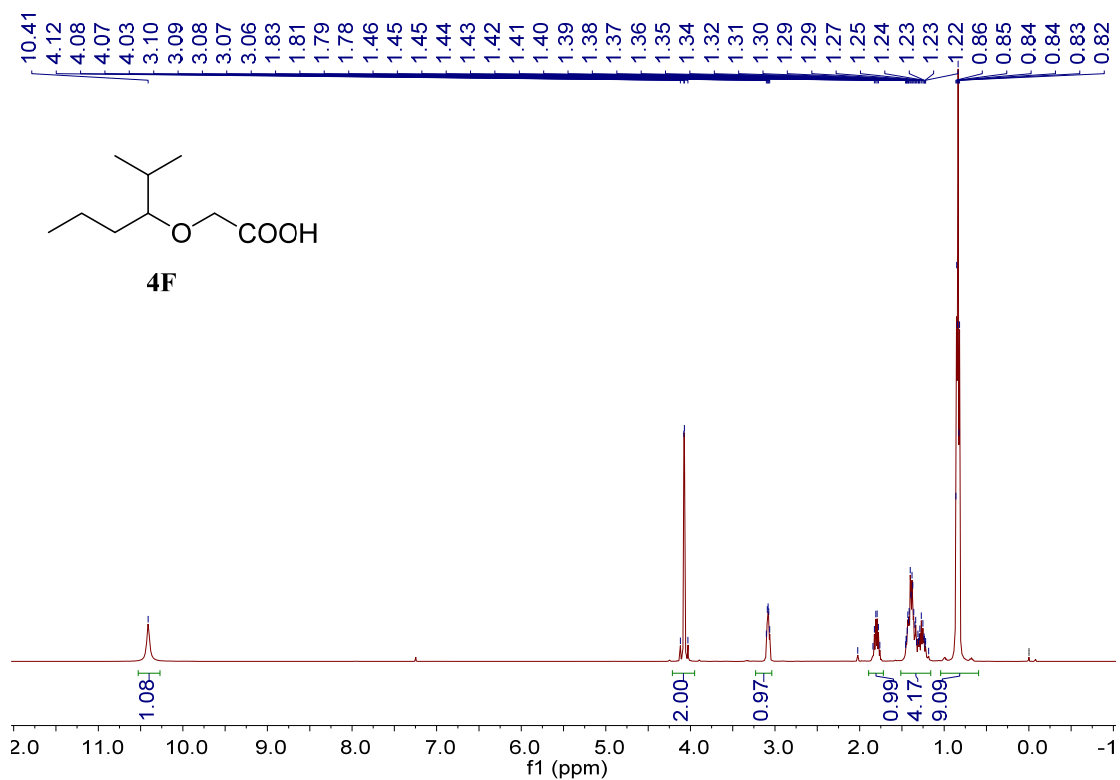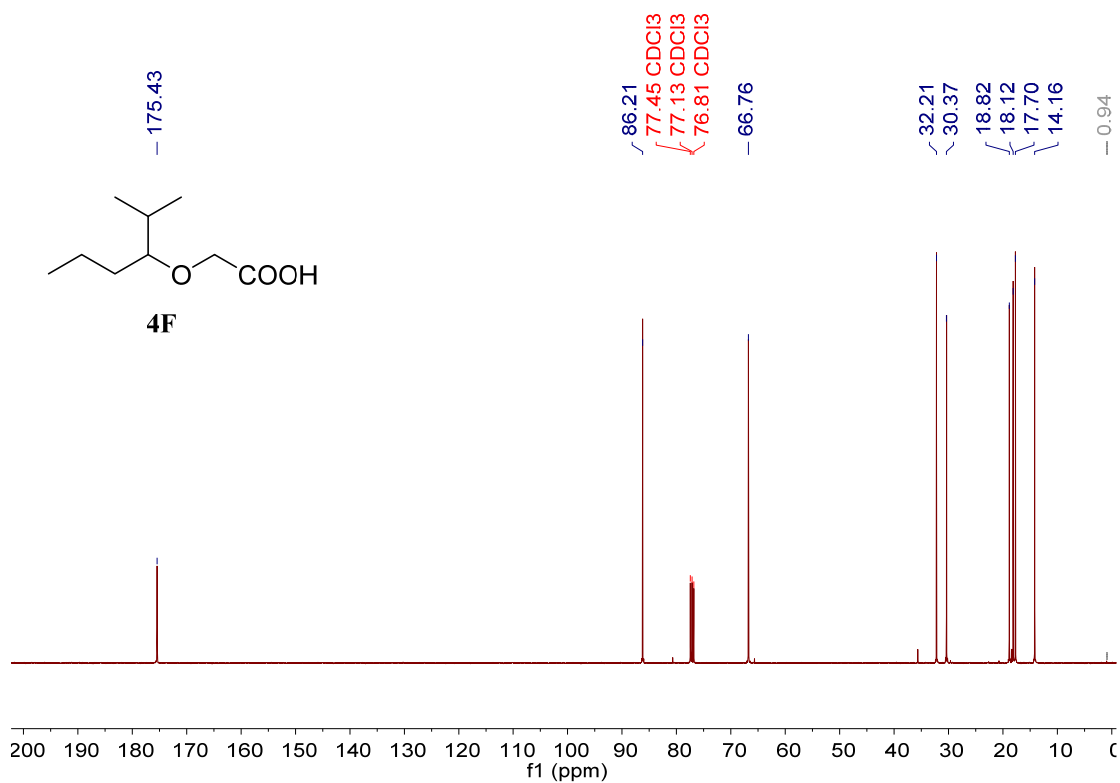

Supplementary Fig. 33. NMR spectra of 2-((2-Methylhexan-3-yl)oxy)acetic acid (4F).

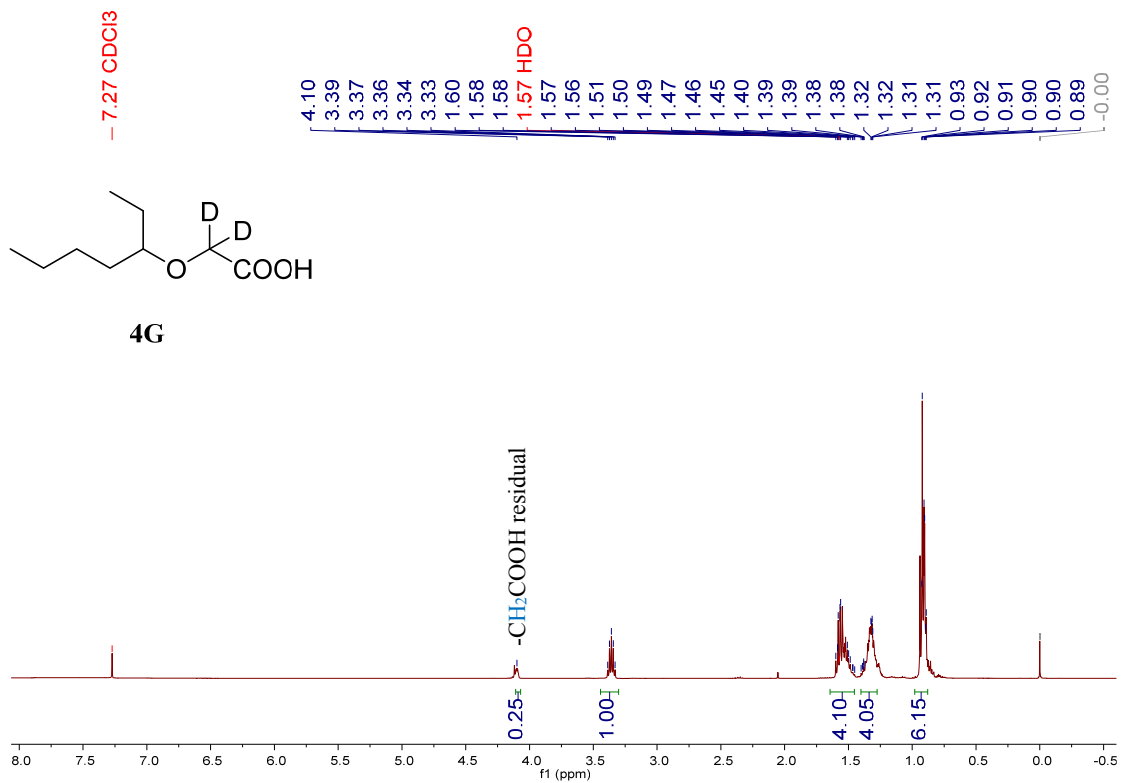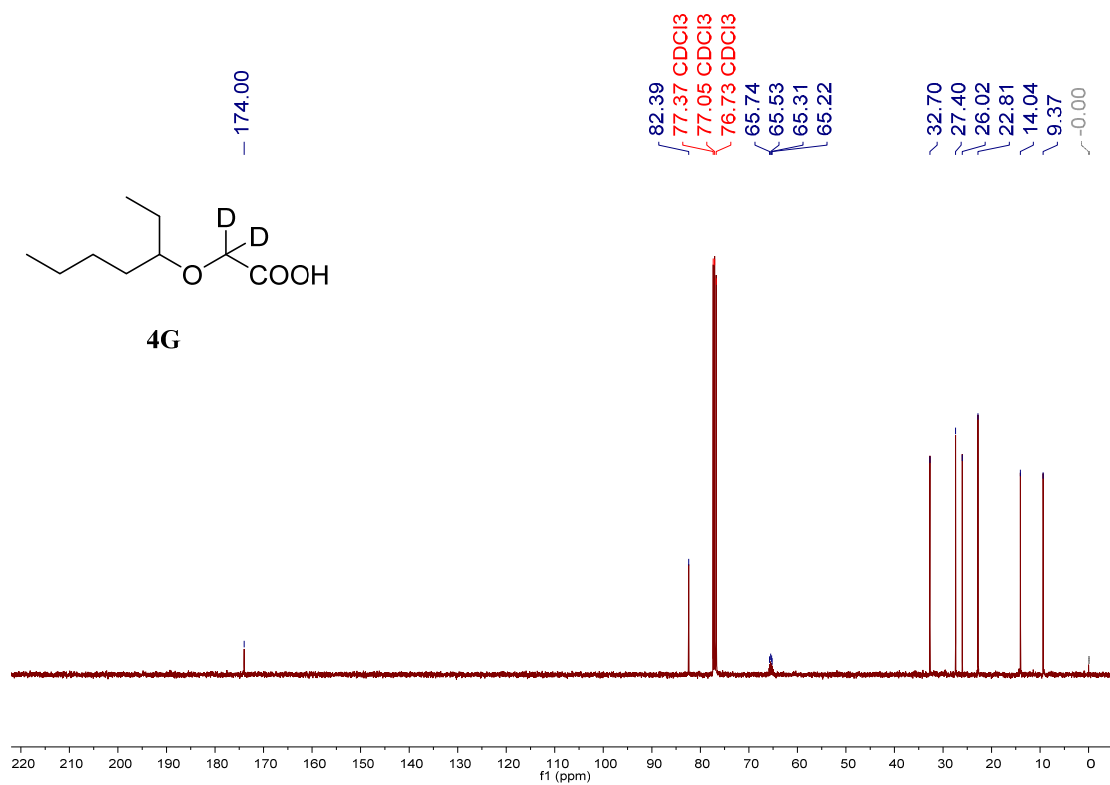

Supplementary Fig. 34. NMR spectra of 2-(Heptan-3-yloxy)acetic-2,2-d<sub>2</sub> acid (4G).

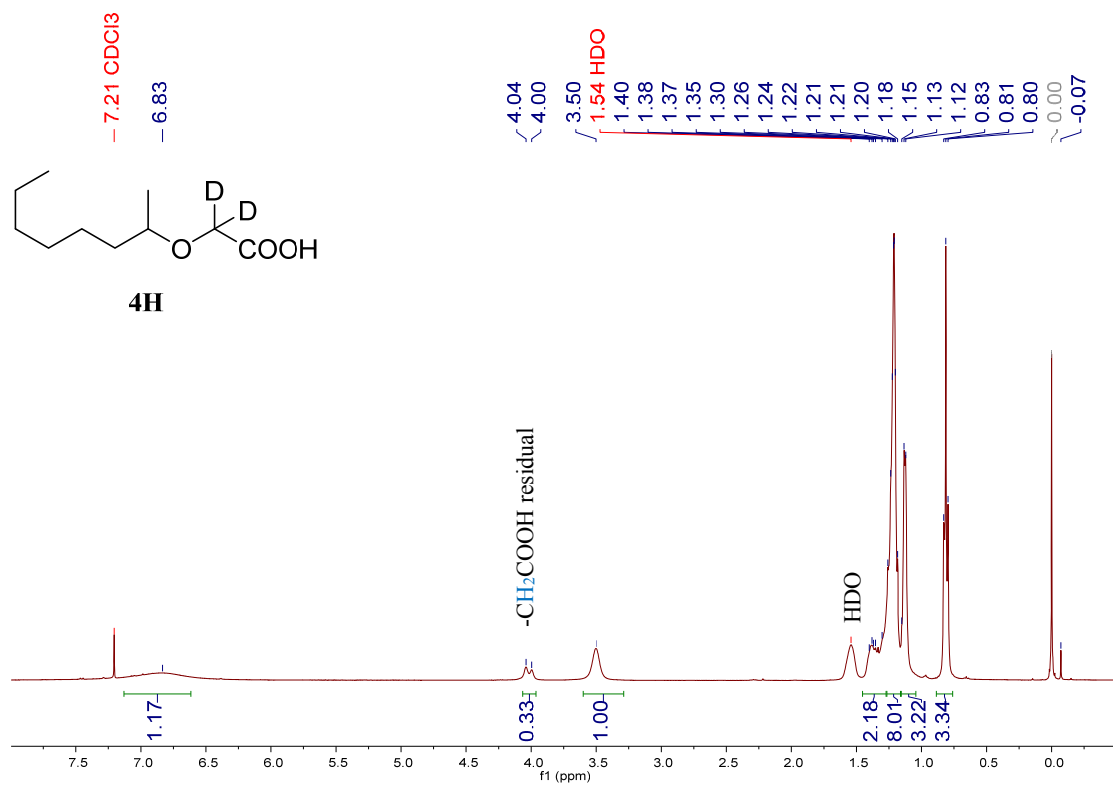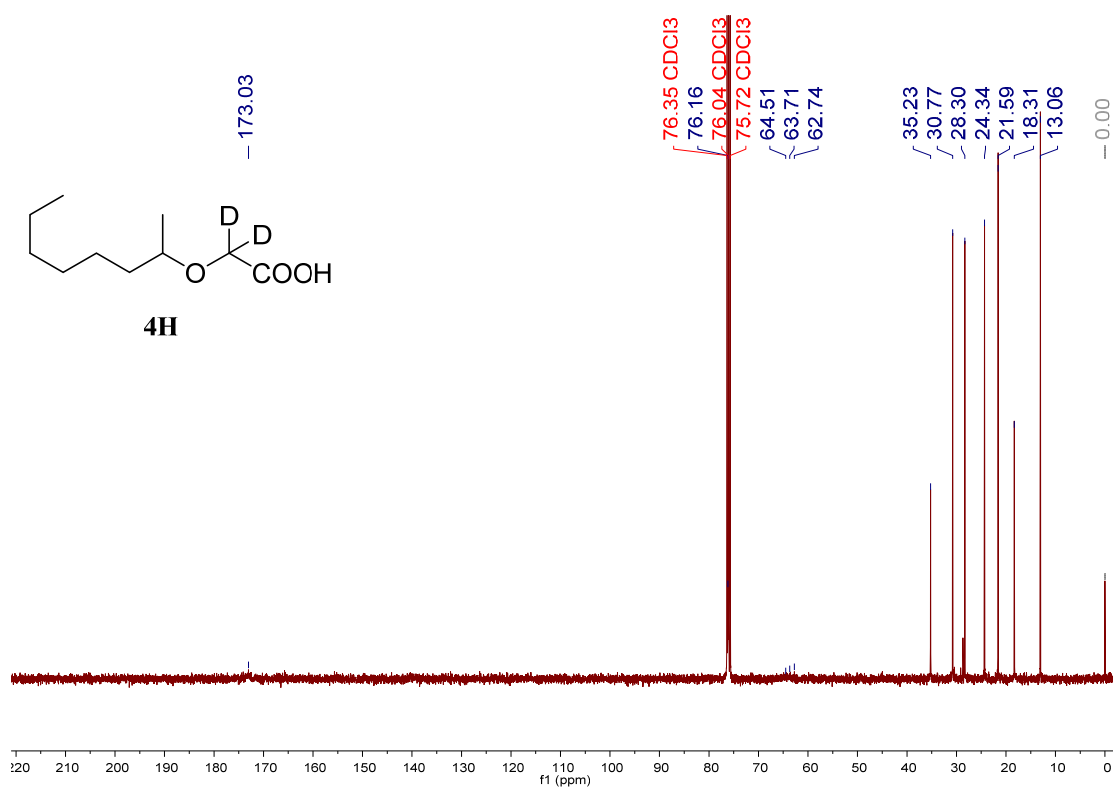

Supplementary Fig. 35. NMR spectra of 2-(Octan-2-yloxy)acetic-2,2-d<sub>2</sub> acid (4H).

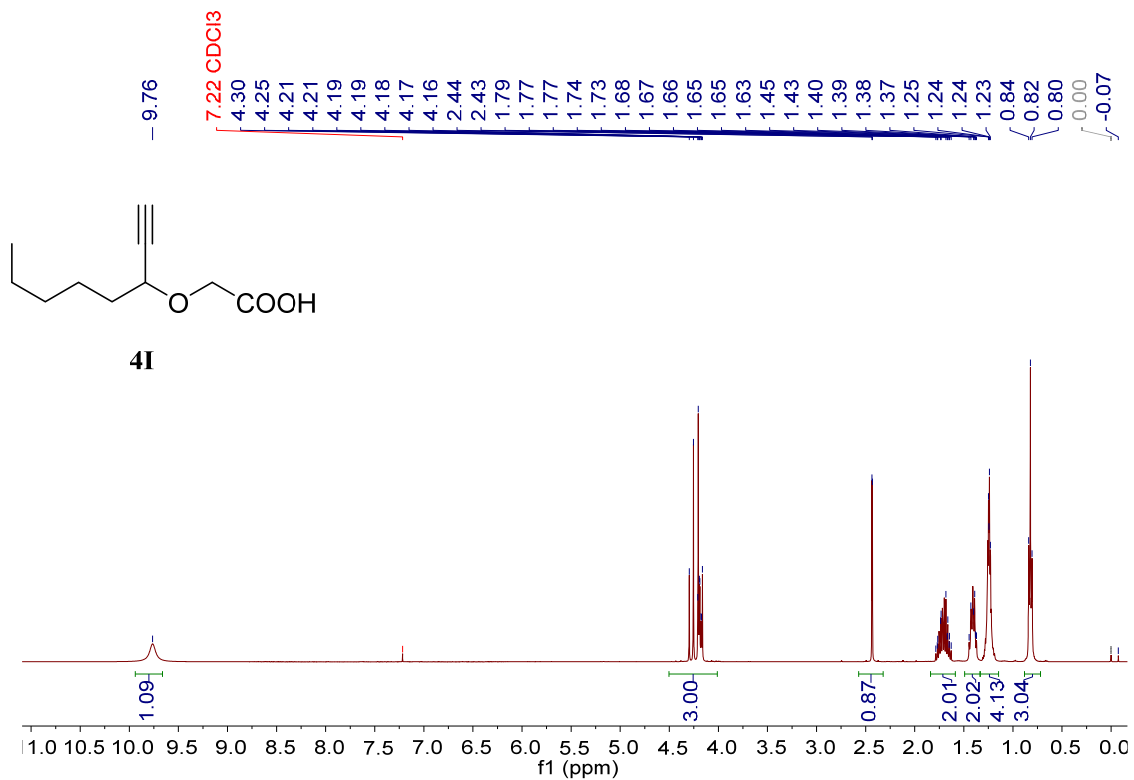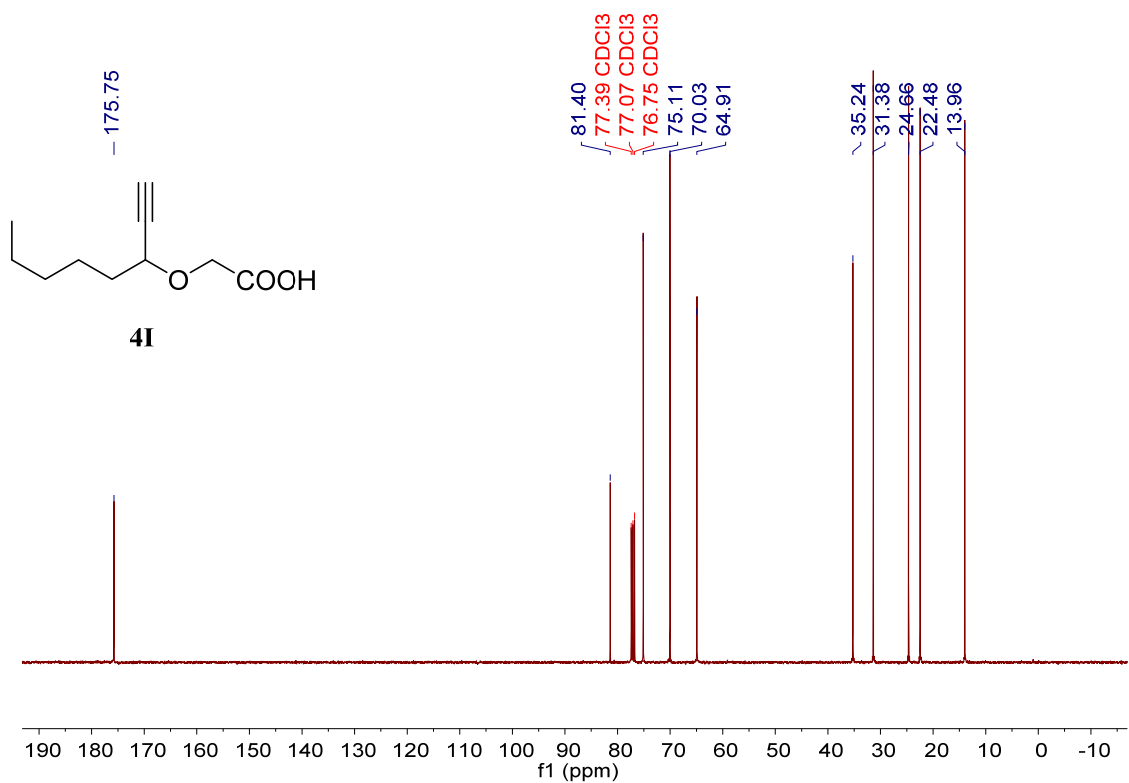

Supplementary Fig. 36. NMR spectra of 2-(Oct-1-yn-3-yloxy)acetic acid (4I).

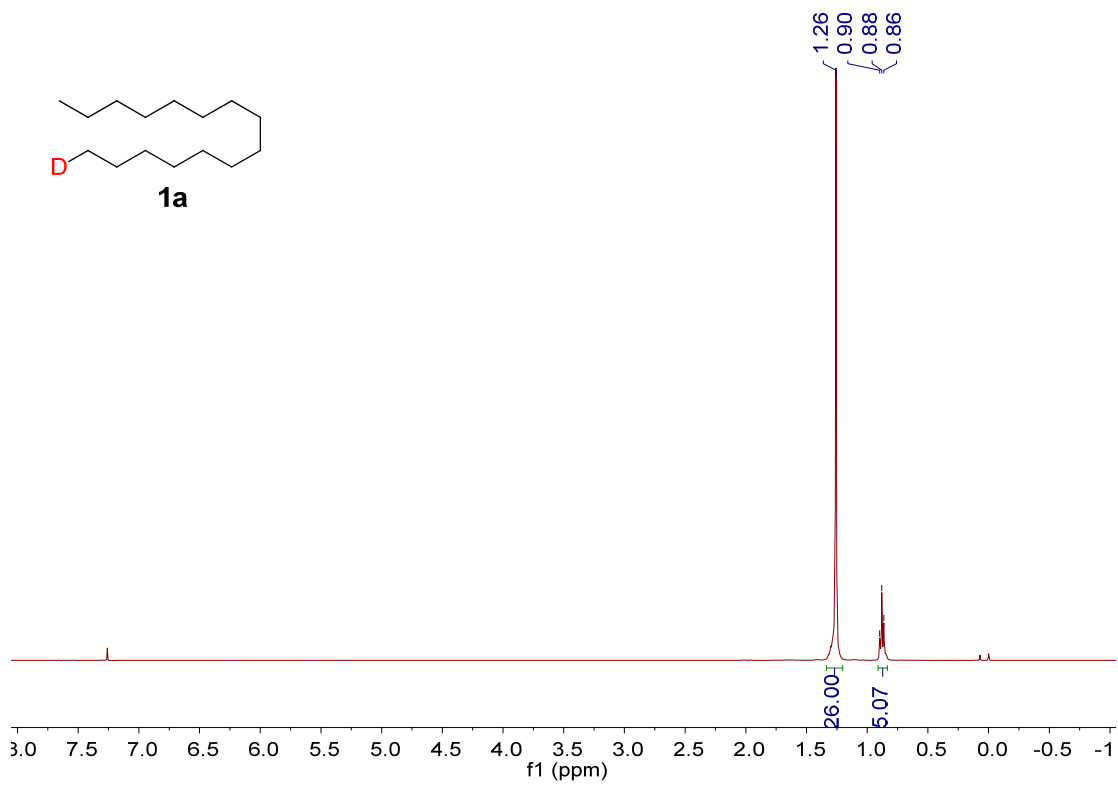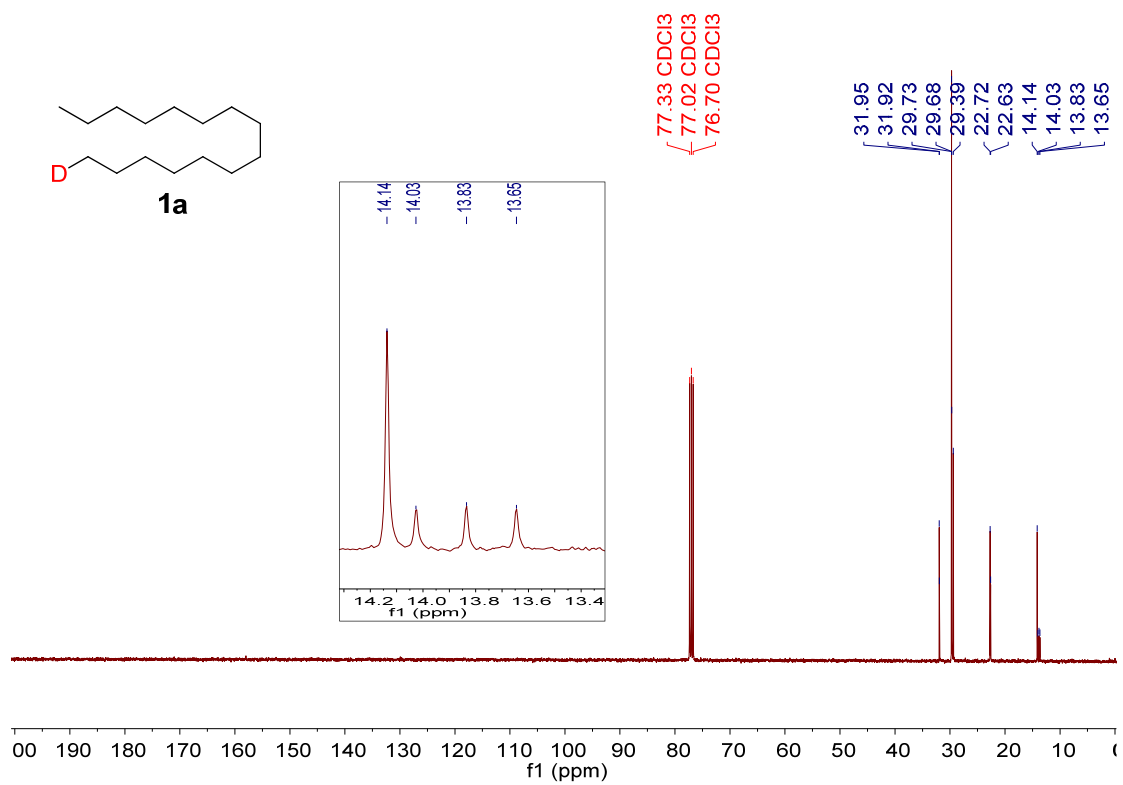

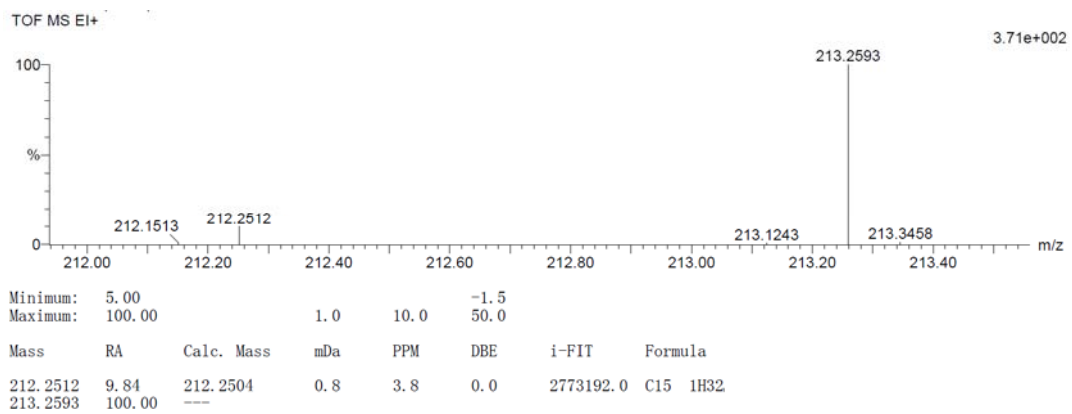

**Supplementary Fig. 37. NMR and HRMS spectra of Pentadecane-1-d (1a).** The splitting of C-D coupling in  $^{13}\text{C}$ -NMR was shown with an enlarged view.



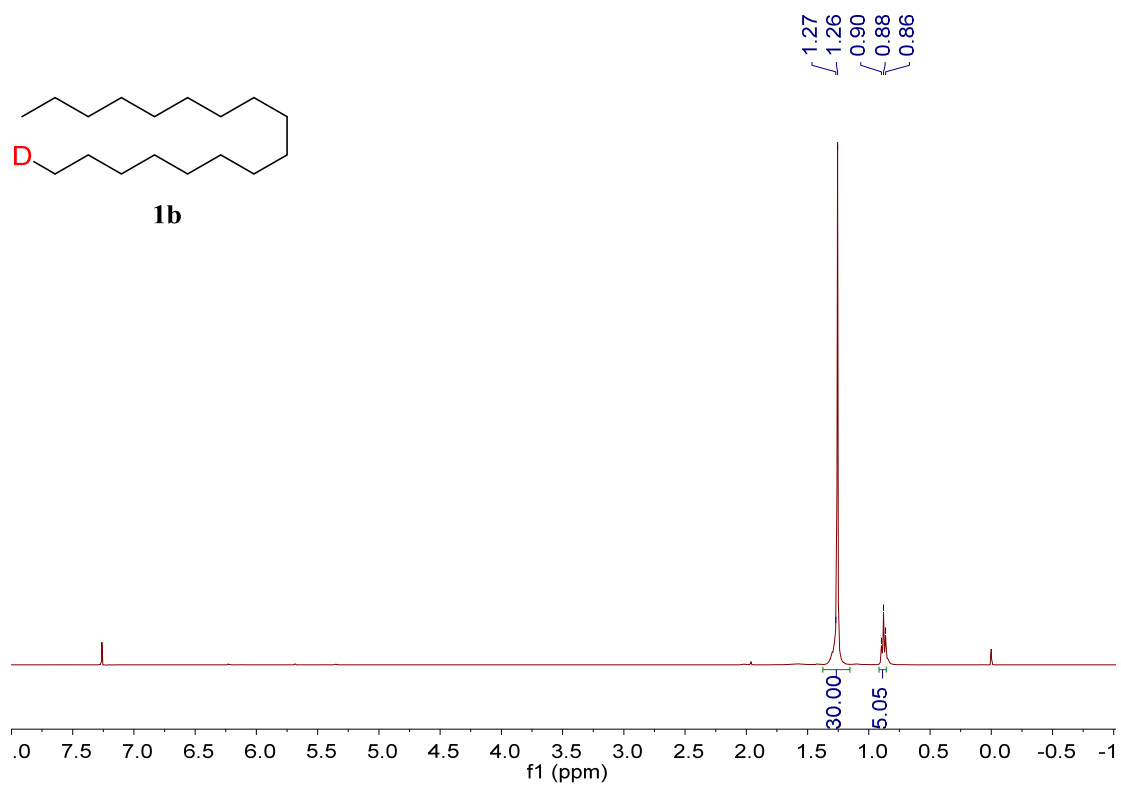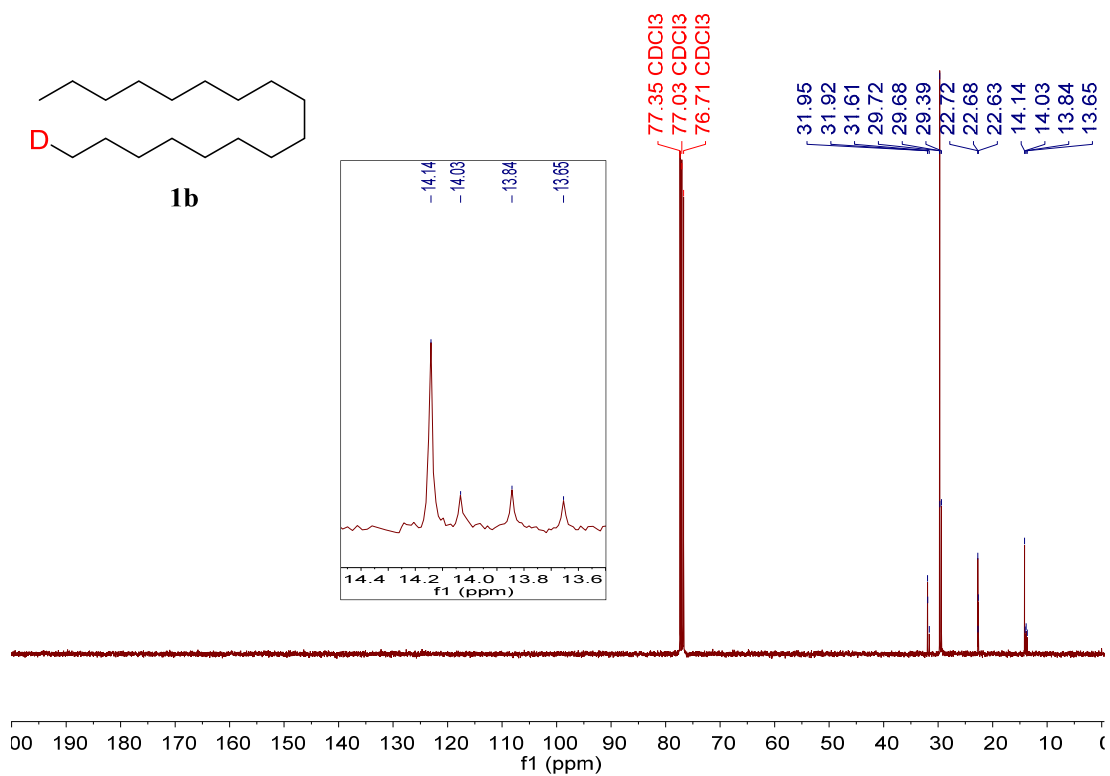

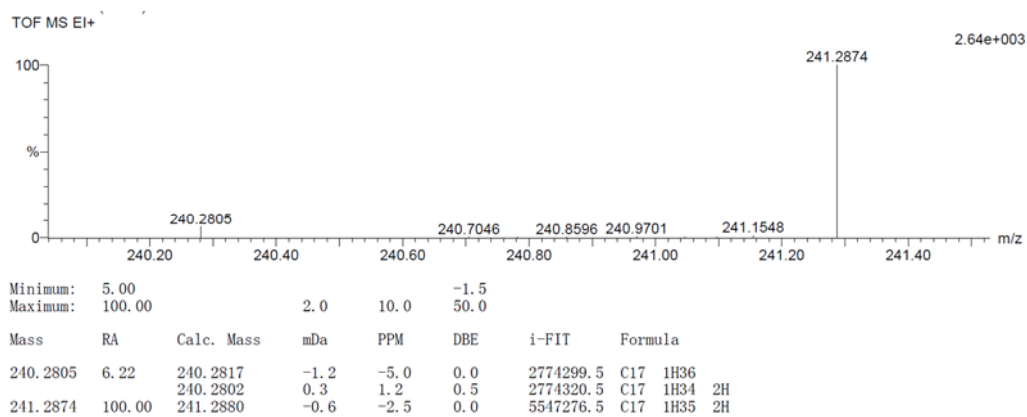

**Supplementary Fig. 38. NMR and HRMS spectra of Heptadecane-1-d (1b).** The splitting of C-D coupling in  $^{13}\text{C}$ -NMR was shown with an enlarged view.

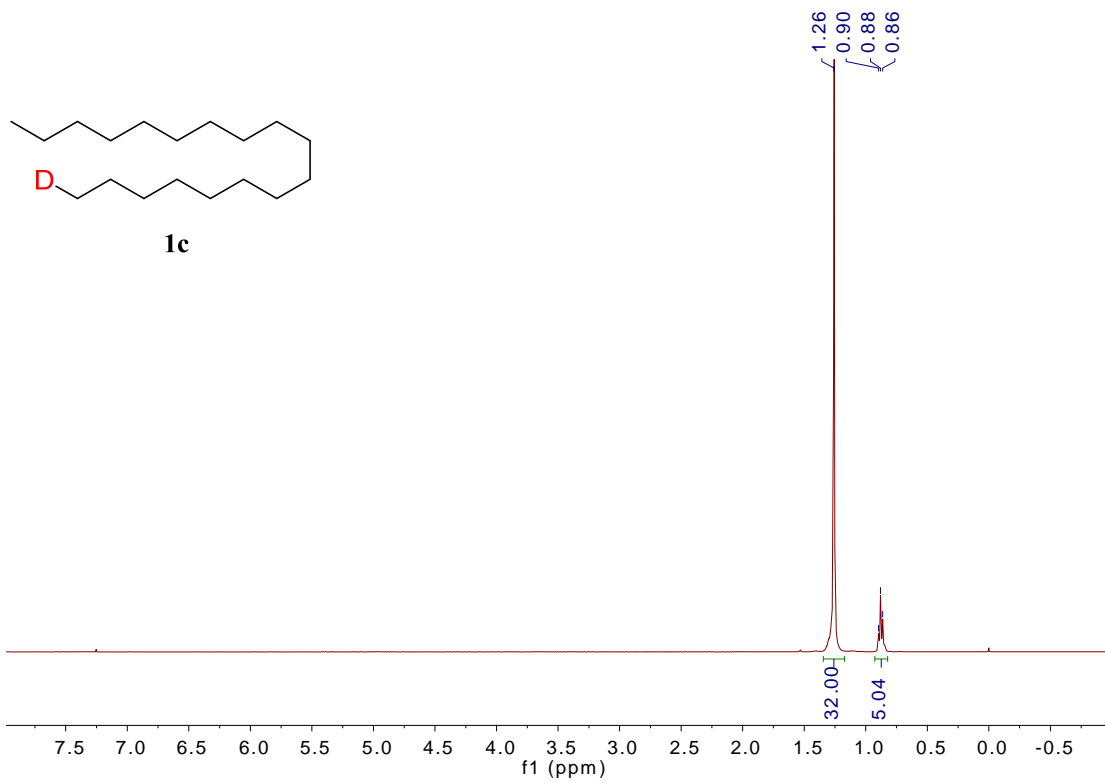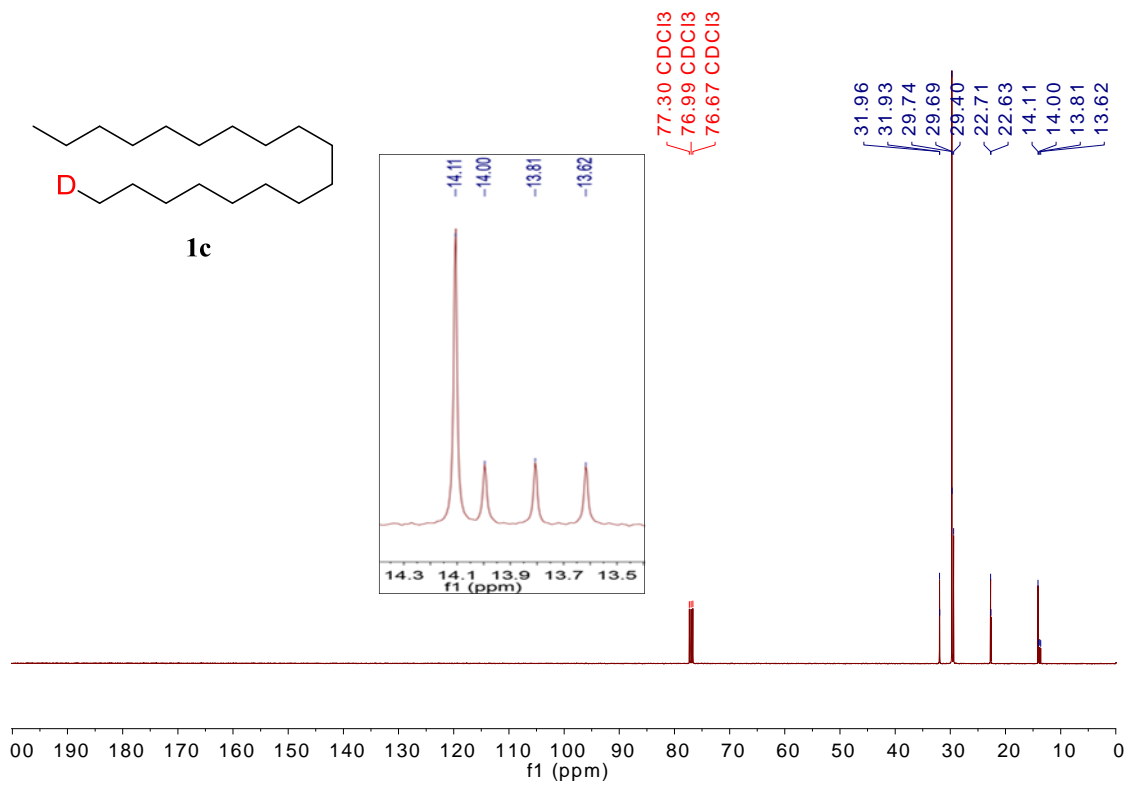

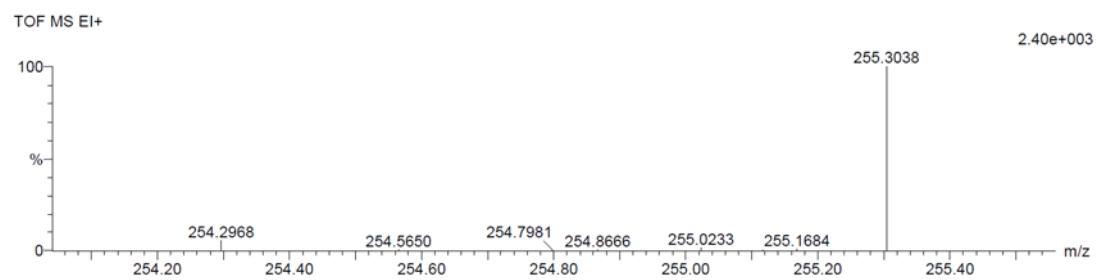

| Mass     | RA     | Calc. Mass | mDa  | PPM  | DBE | i-FIT     | Formula     |
|----------|--------|------------|------|------|-----|-----------|-------------|
| 254.2968 | 5.11   | 254.2974   | -0.6 | -2.4 | 0.0 | 2774185.8 | C18 1H38    |
| 255.3038 | 100.00 | 255.3036   | 0.2  | 0.8  | 0.0 | 5547164.0 | C18 1H37 2H |

**Supplementary Fig. 39.** NMR and HRMS spectra of Octadecane-1-d (**1c**). The splitting of C-D coupling in  $^{13}\text{C}$ -NMR was shown with an enlarged view.

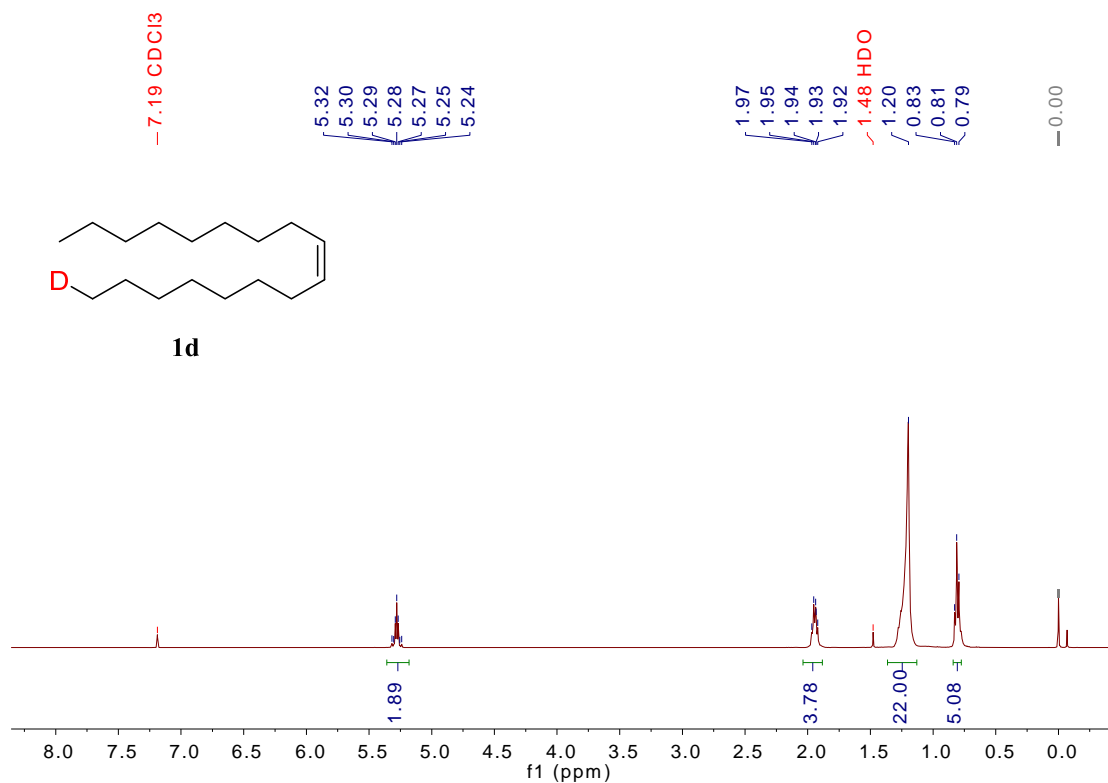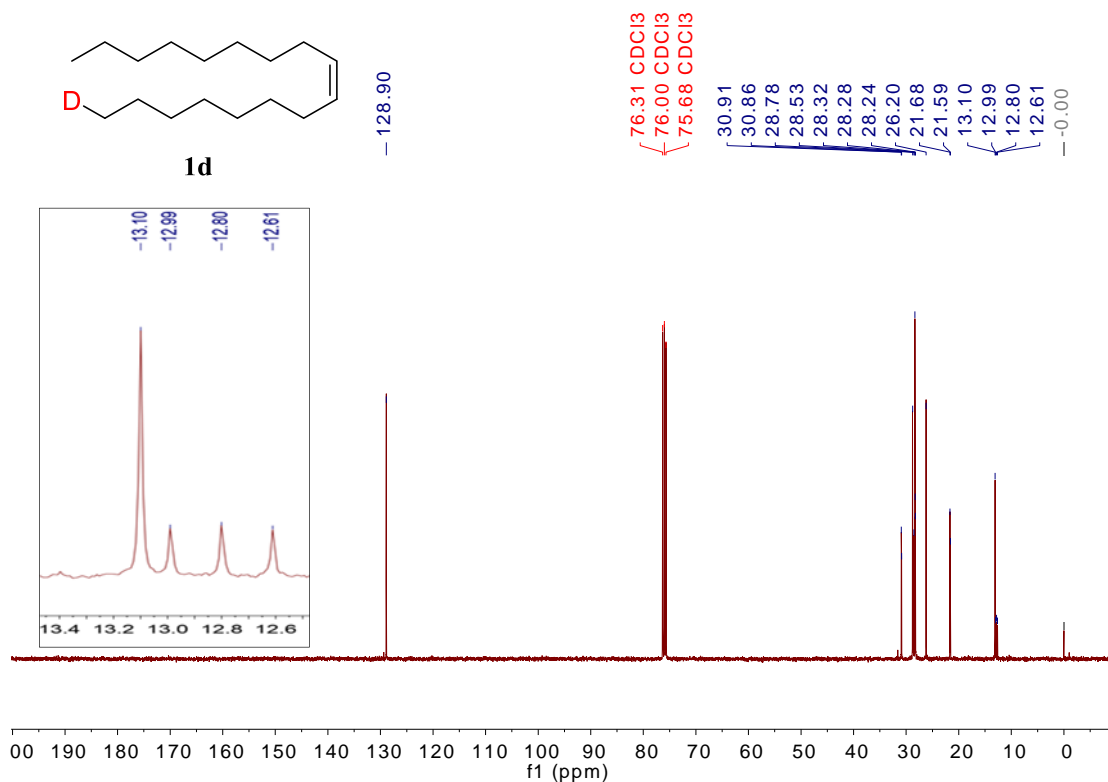

**Supplementary Fig. 40.** NMR spectra of (Z)-Heptadec-8-ene-1-d (**1d**). The splitting of C-D coupling in <sup>13</sup>C-NMR was shown with an enlarged view.

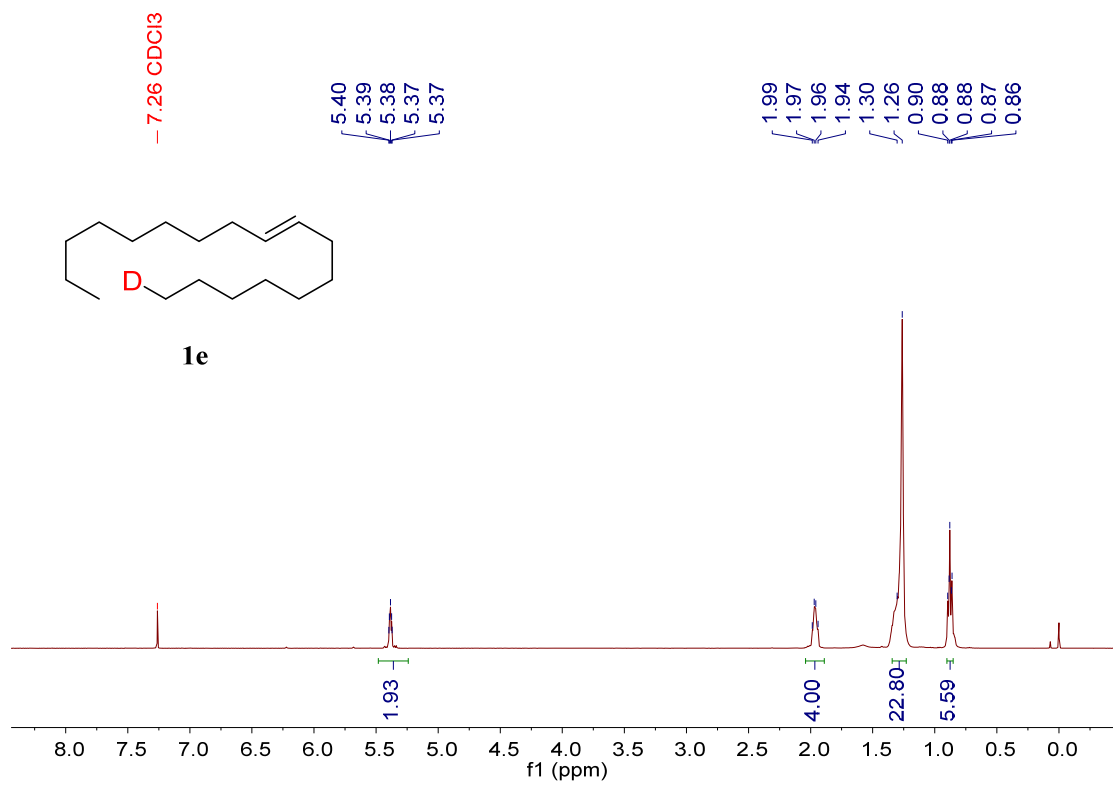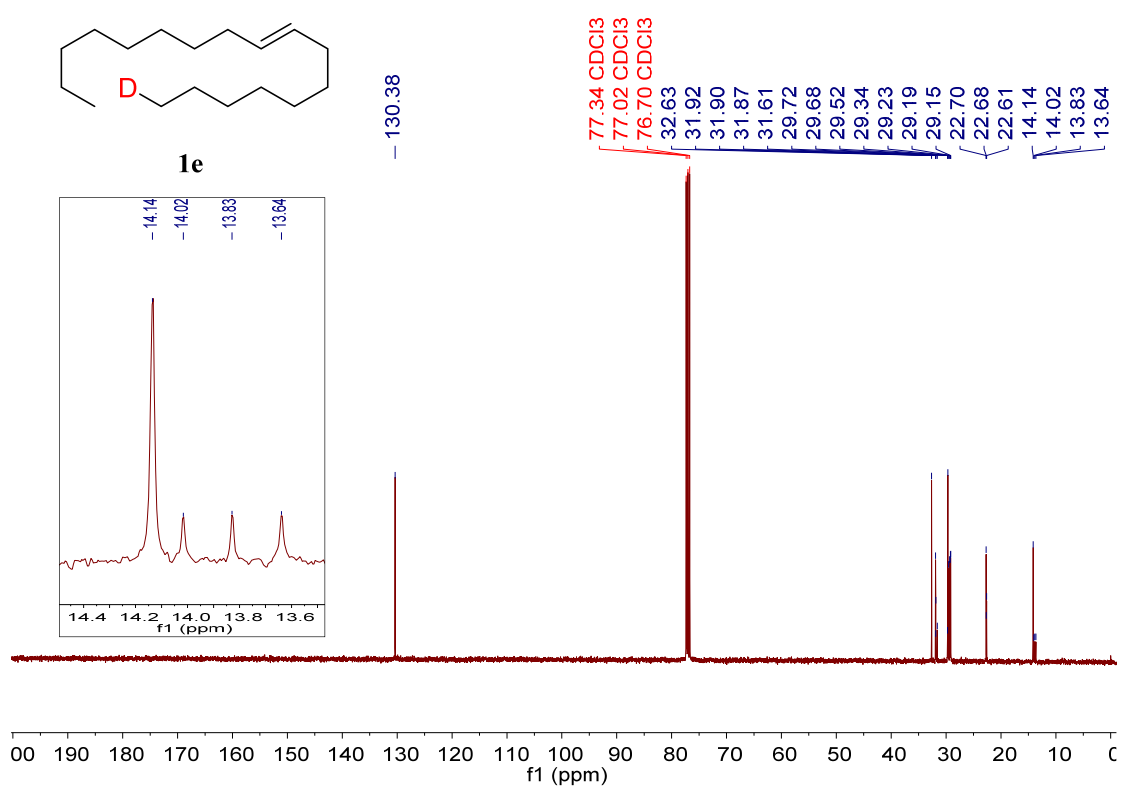

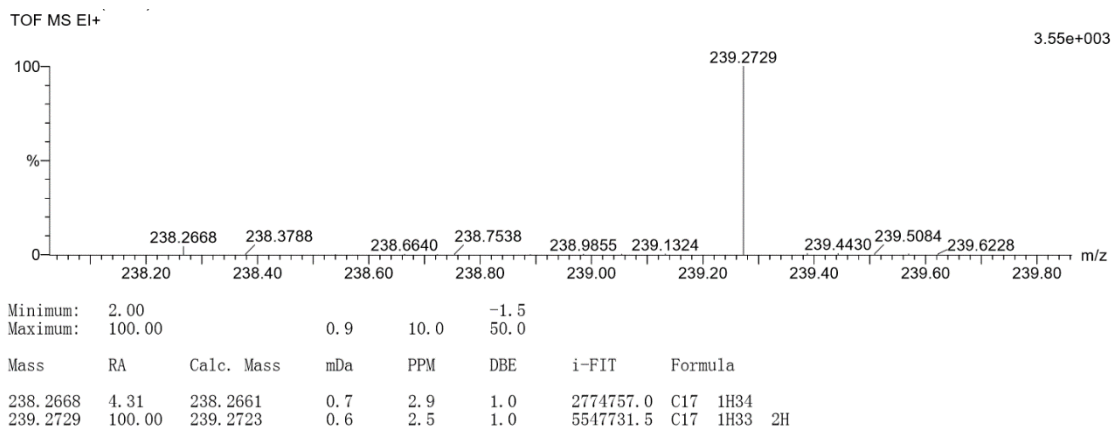

**Supplementary Fig. 41. NMR and HRMS spectra of (E)-Heptadec-8-ene-1-d (1e).** The splitting of C-D coupling in  $^{13}\text{C}$ -NMR was shown with an enlarged view.

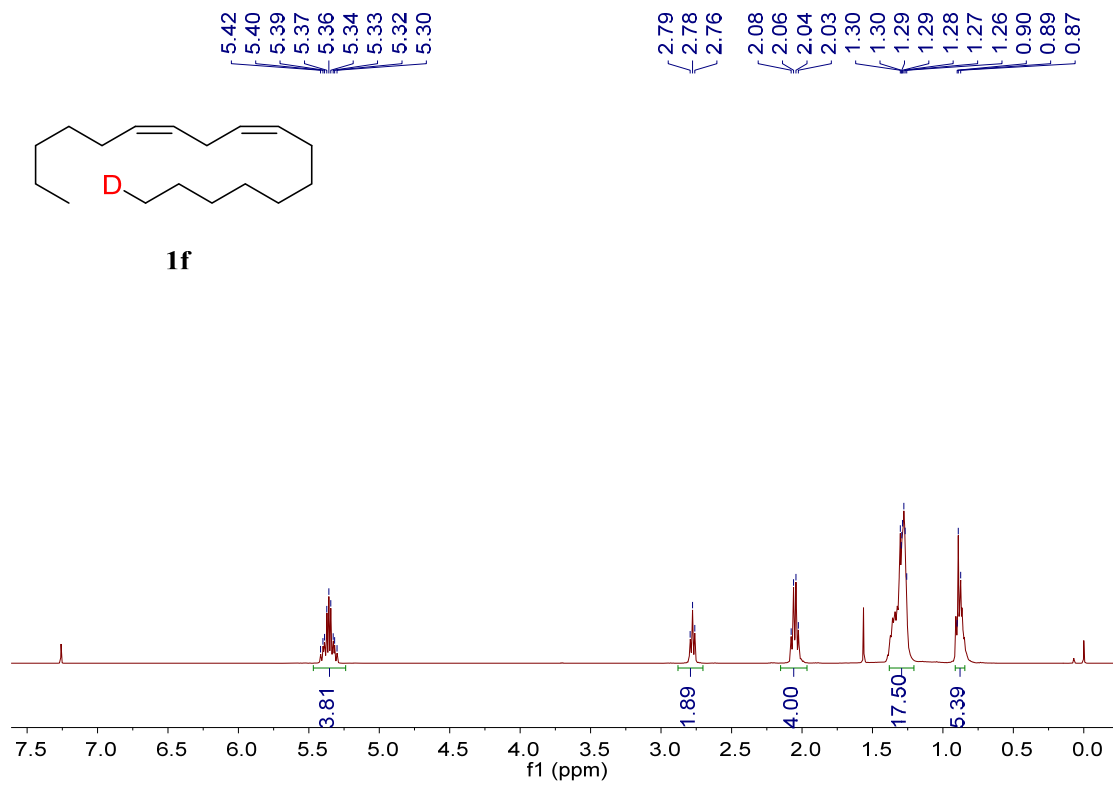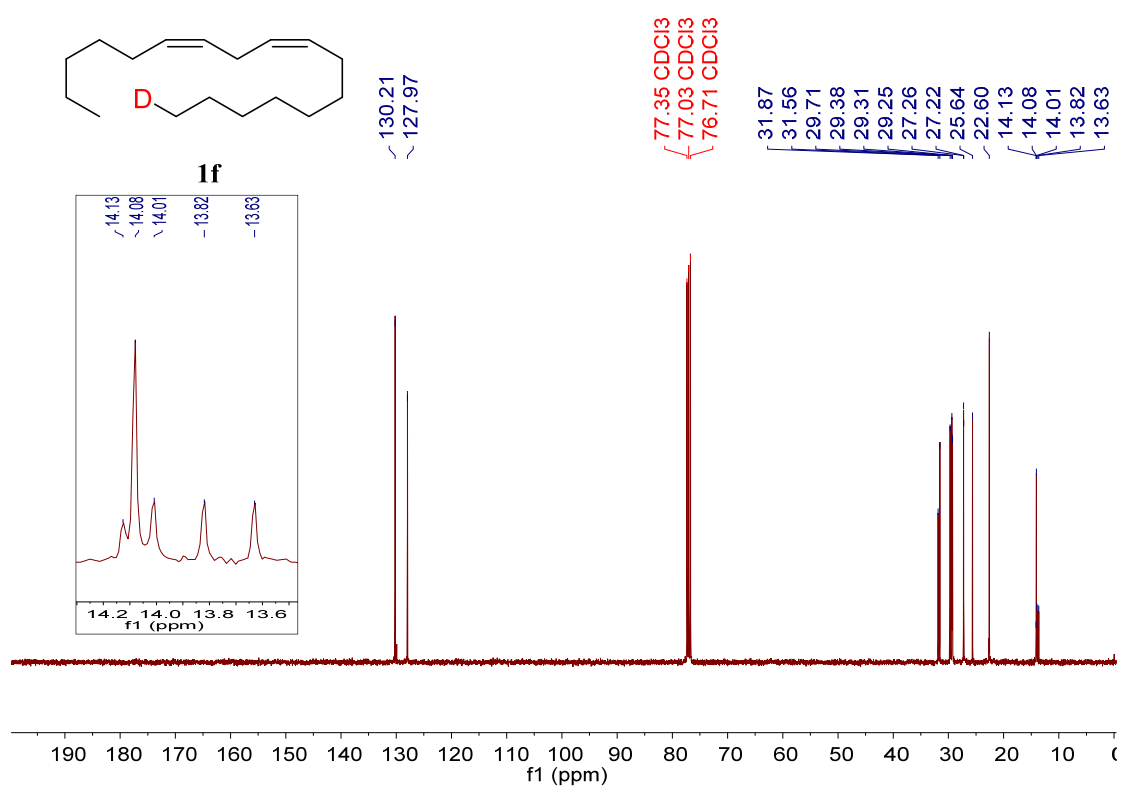



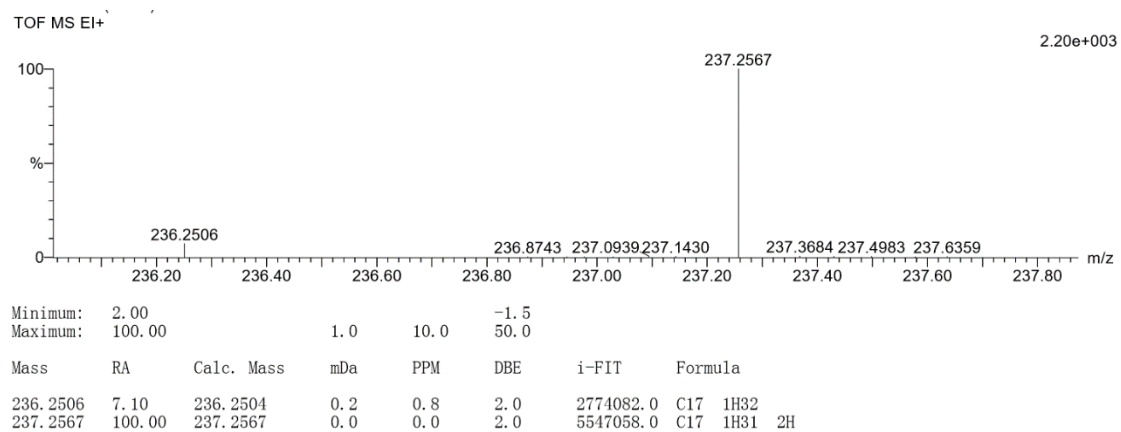

**Supplementary Fig. 42.** NMR and HRMS spectra of (6Z,9Z)-Heptadeca-6,9-diene-17-d (**1f**). The splitting of C-D coupling in  $^{13}\text{C}$ -NMR was shown with an enlarged view.

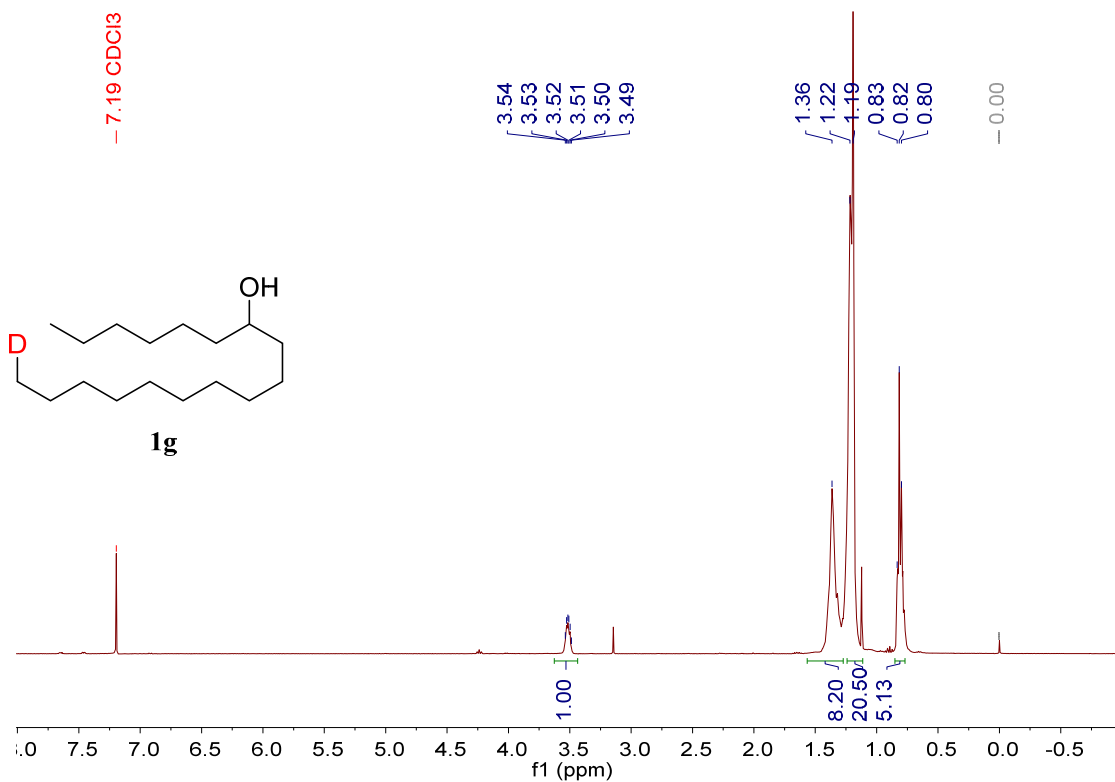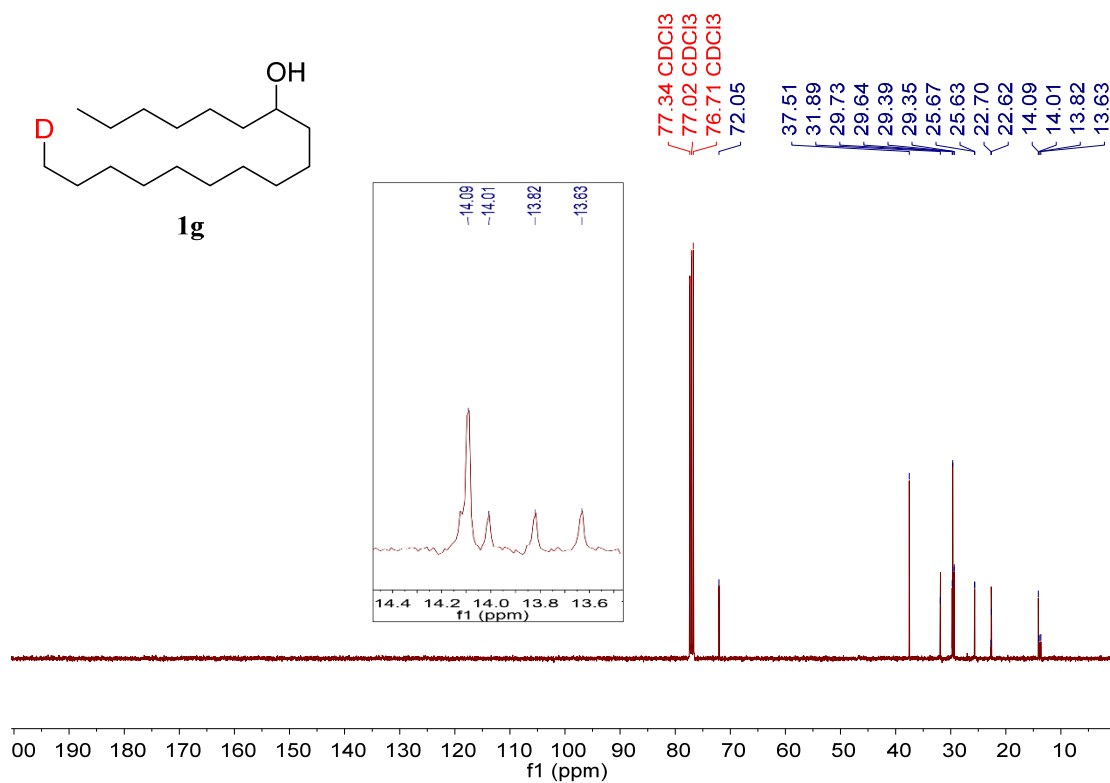

**Supplementary Fig. 43. NMR spectra of Heptadecan-17-d-7-ol (1g).** The splitting of C-D coupling in  $^{13}\text{C}$ -NMR was shown with an enlarged view.

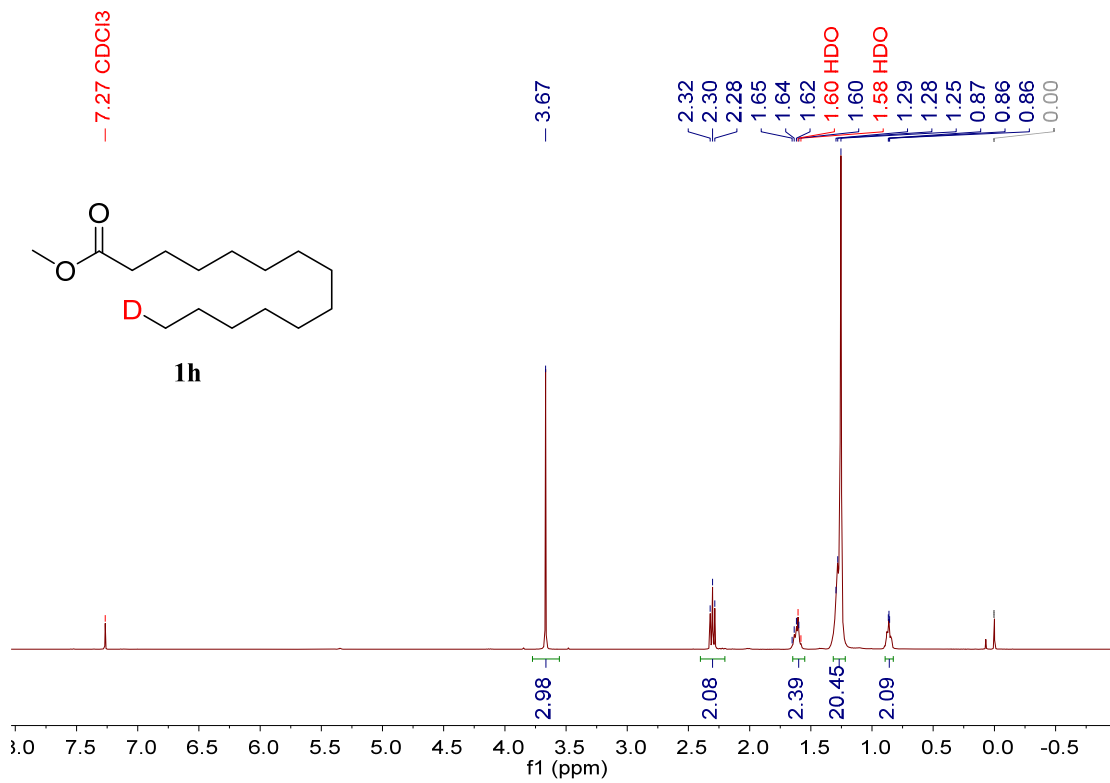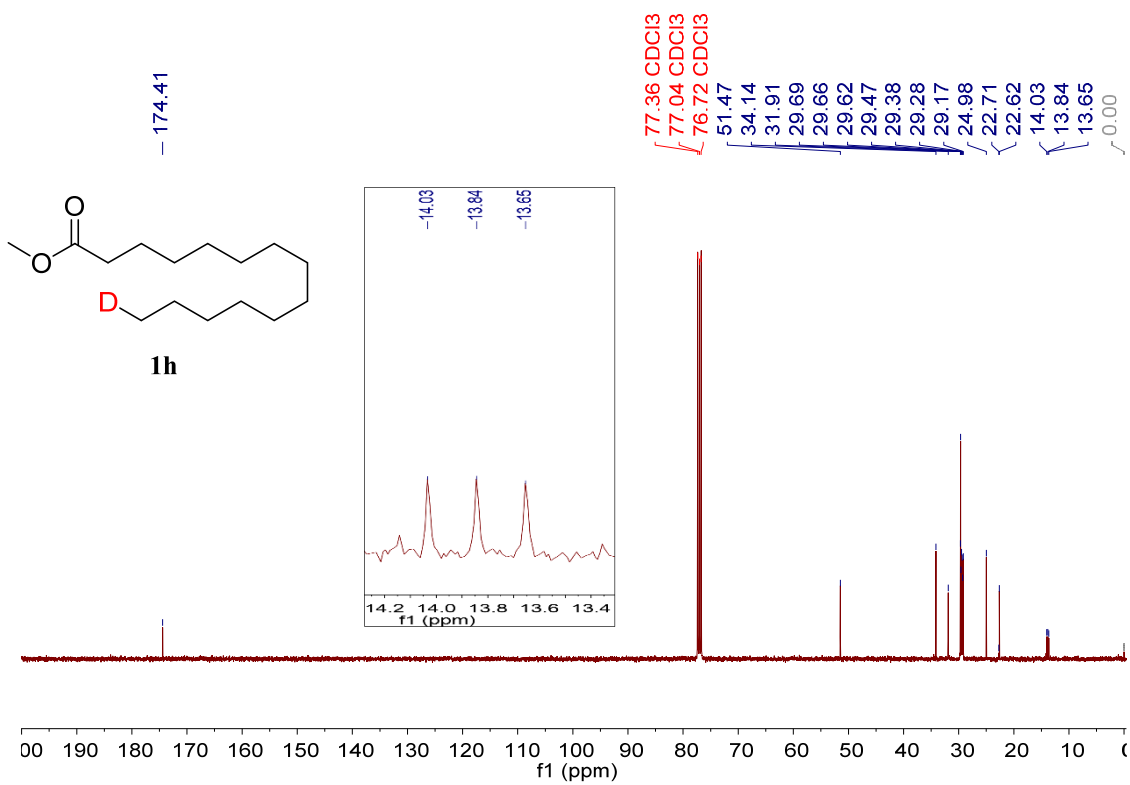

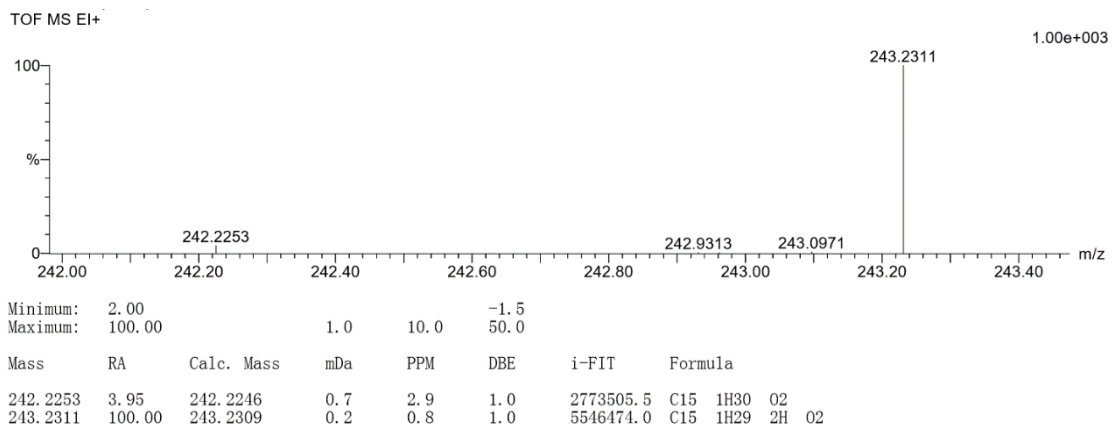

**Supplementary Fig. 44. NMR and HRMS spectra of Methyl tetradecanoate-14-d (1h).** The splitting of C-D coupling in  $^{13}\text{C}$ -NMR was shown with an enlarged view.

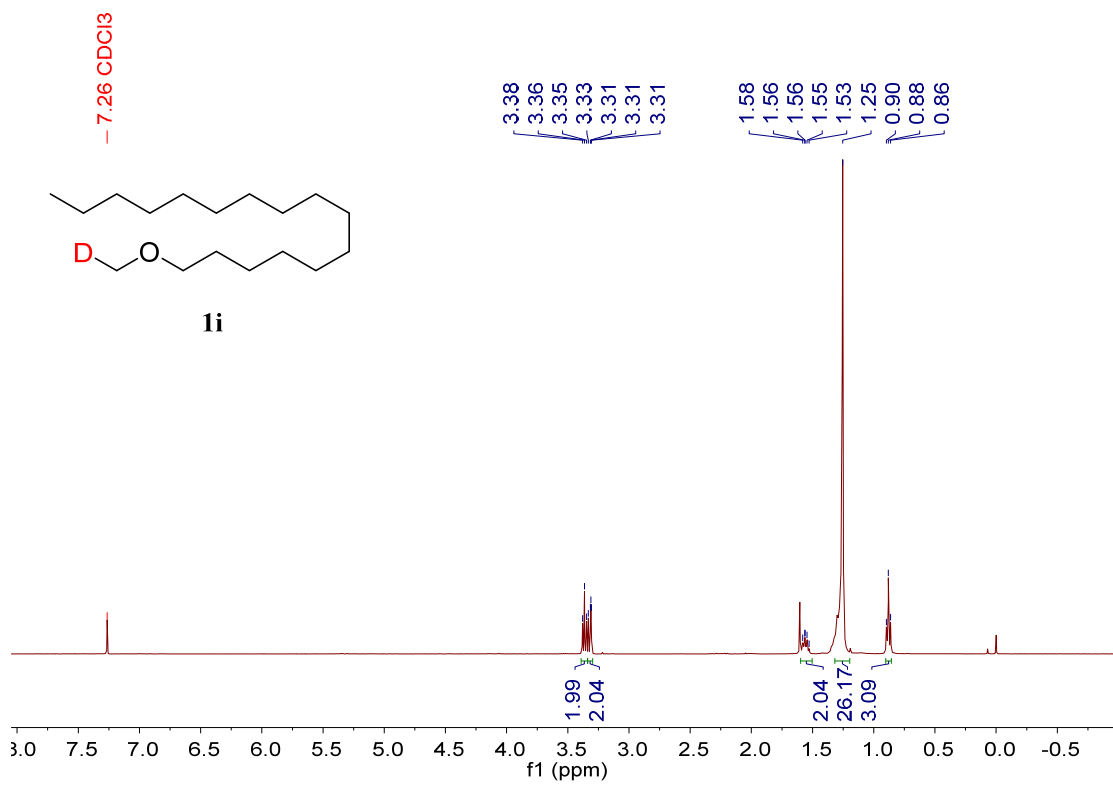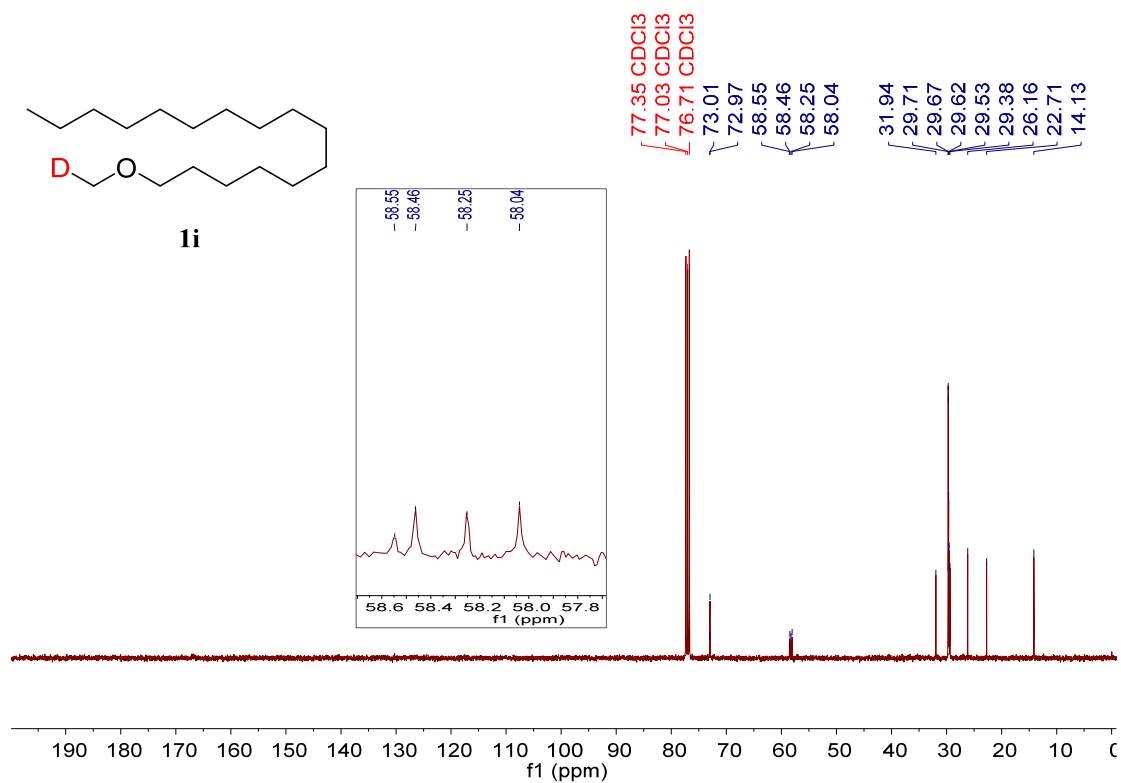

**Supplementary Fig. 45. NMR spectra of 1-(Methoxy-d)hexadecane (**1i**).** The splitting of C-D coupling in  $^{13}C$ -NMR was shown with an enlarged view.

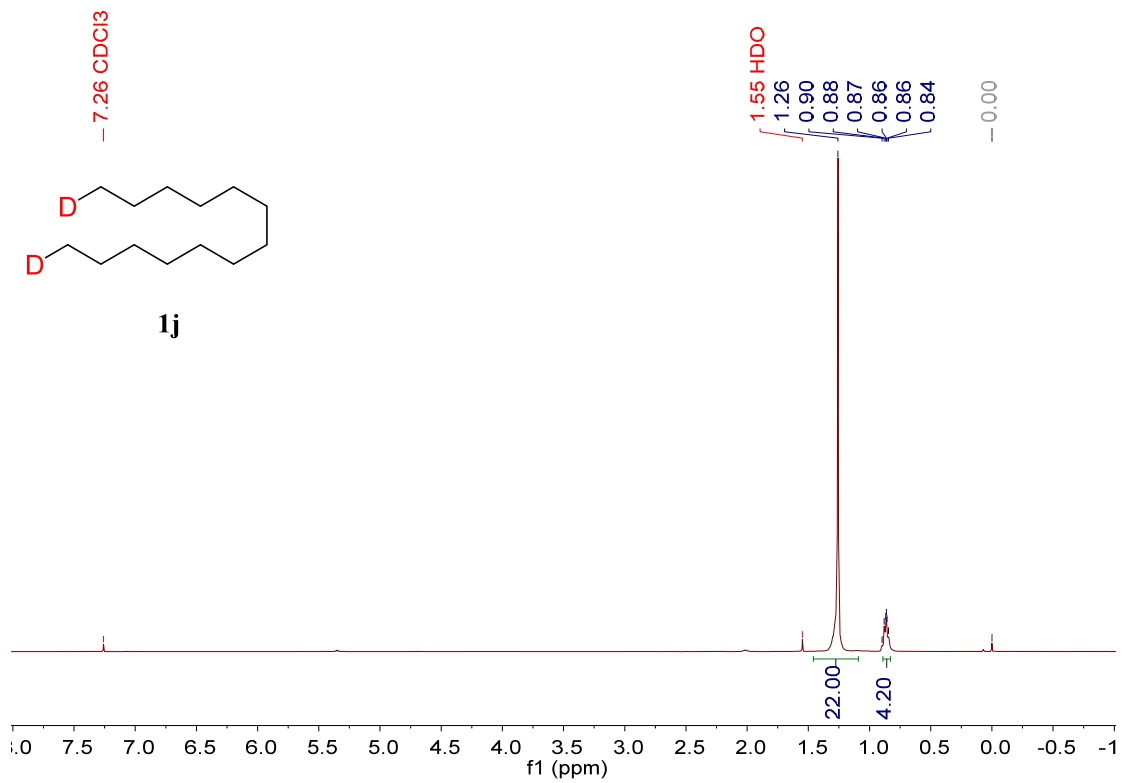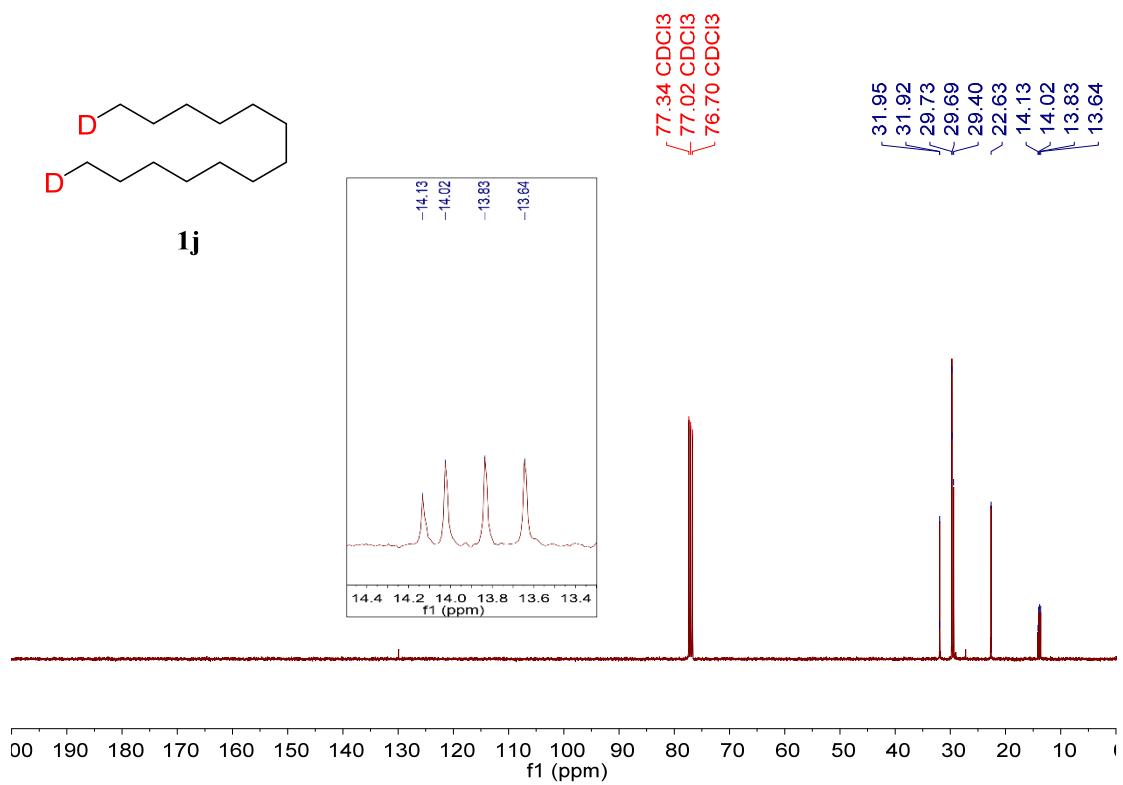

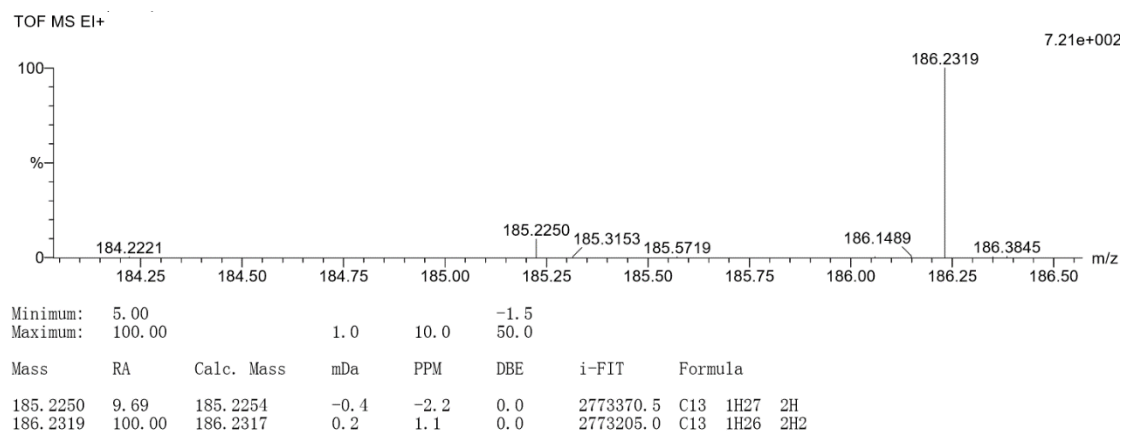

**Supplementary Fig. 46. NMR and HRMS spectra of Tridecane-1,13-d2 (1j).** The splitting of C-D coupling in  $^{13}\text{C}$ -NMR was shown with an enlarged view.

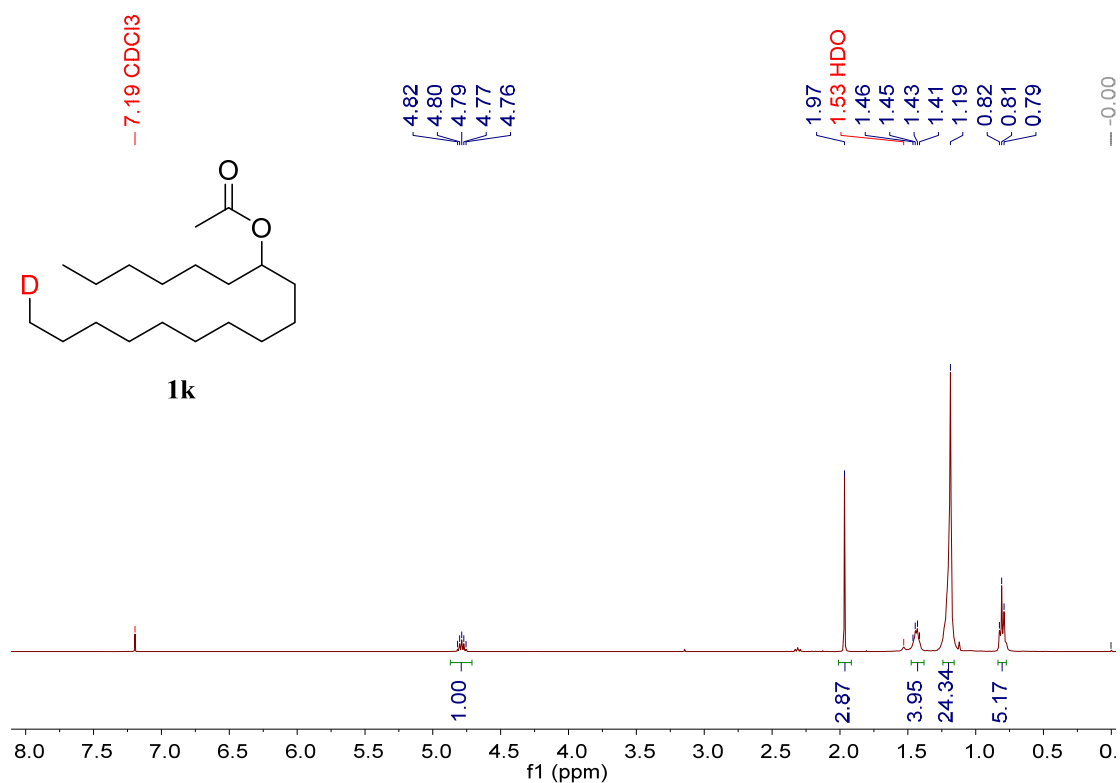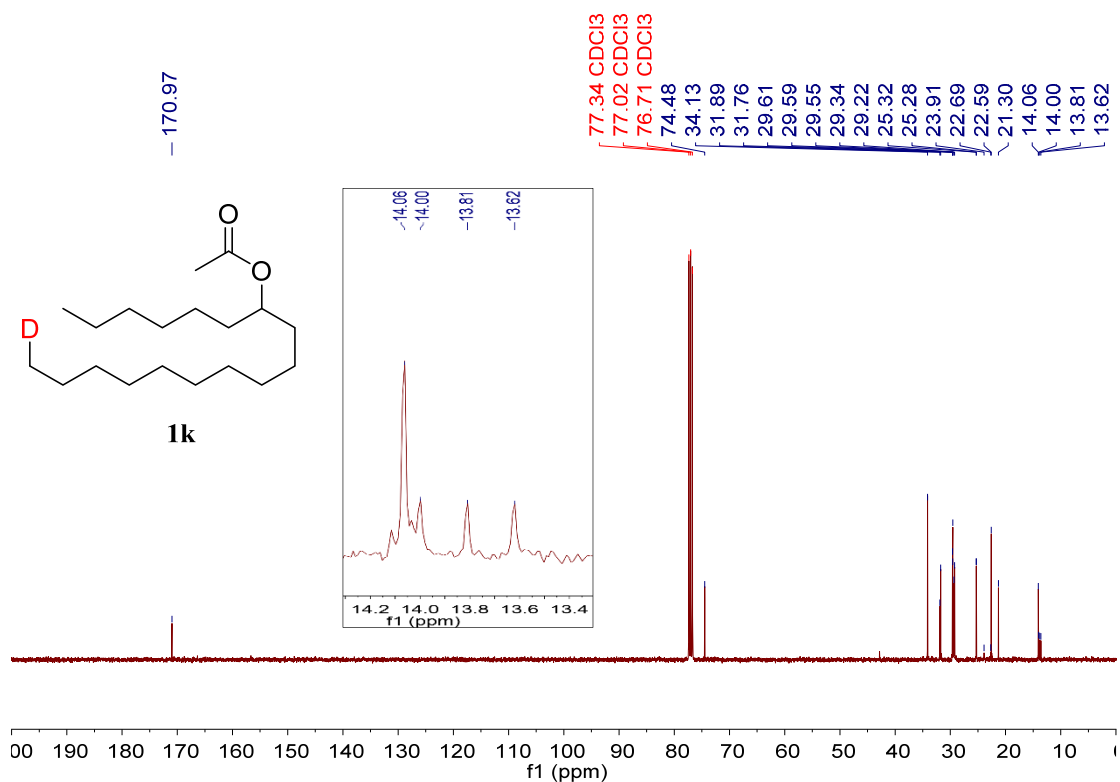

**Supplementary Fig. 47.** NMR spectra of Heptadecan-7-yl-17-d acetate (**1k**). The splitting of C-D coupling in <sup>13</sup>C-NMR was shown with an enlarged view.



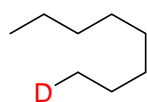

**2a**

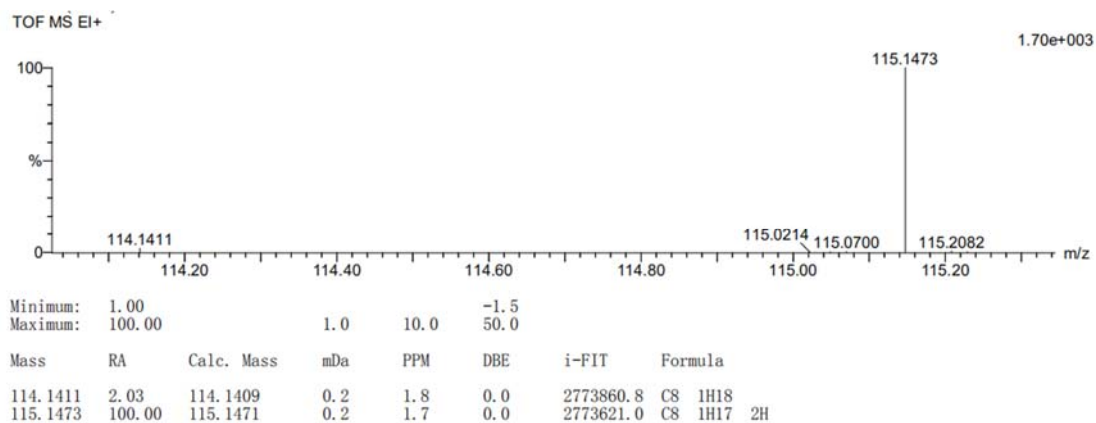

**Supplementary Fig. 48. HRMS spectrum of Octane-1-d (2a).**

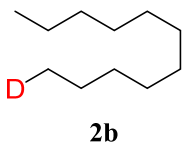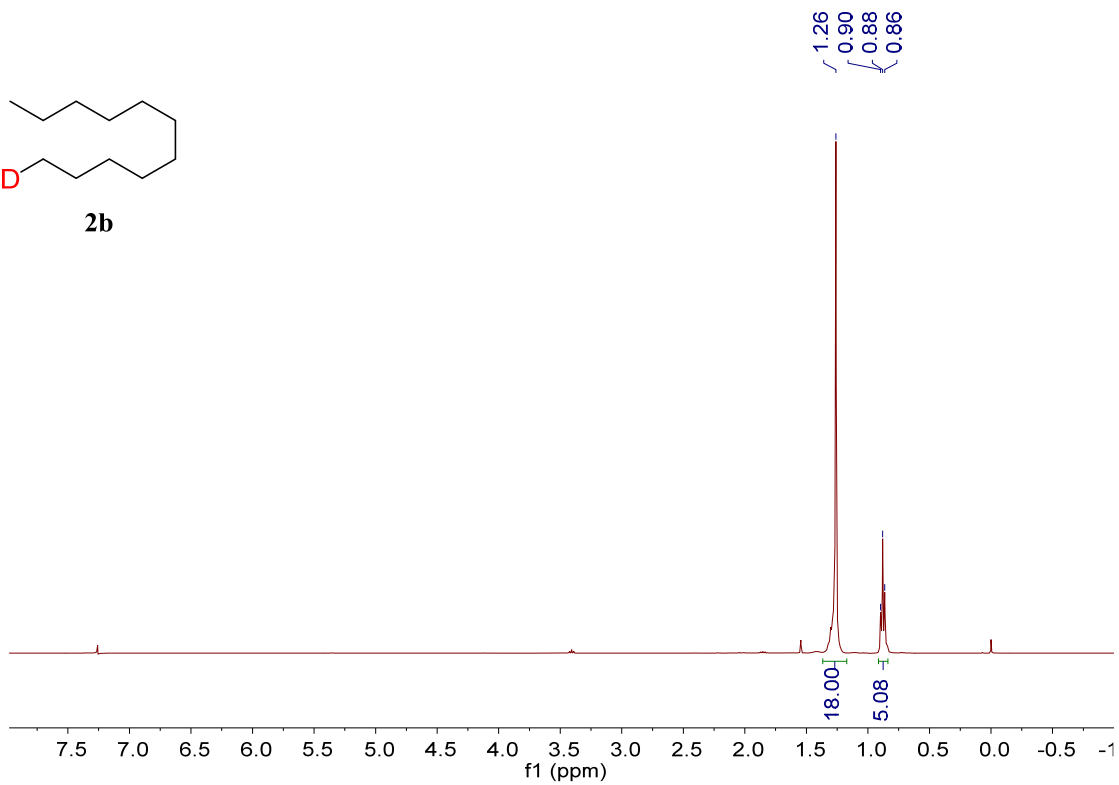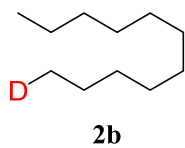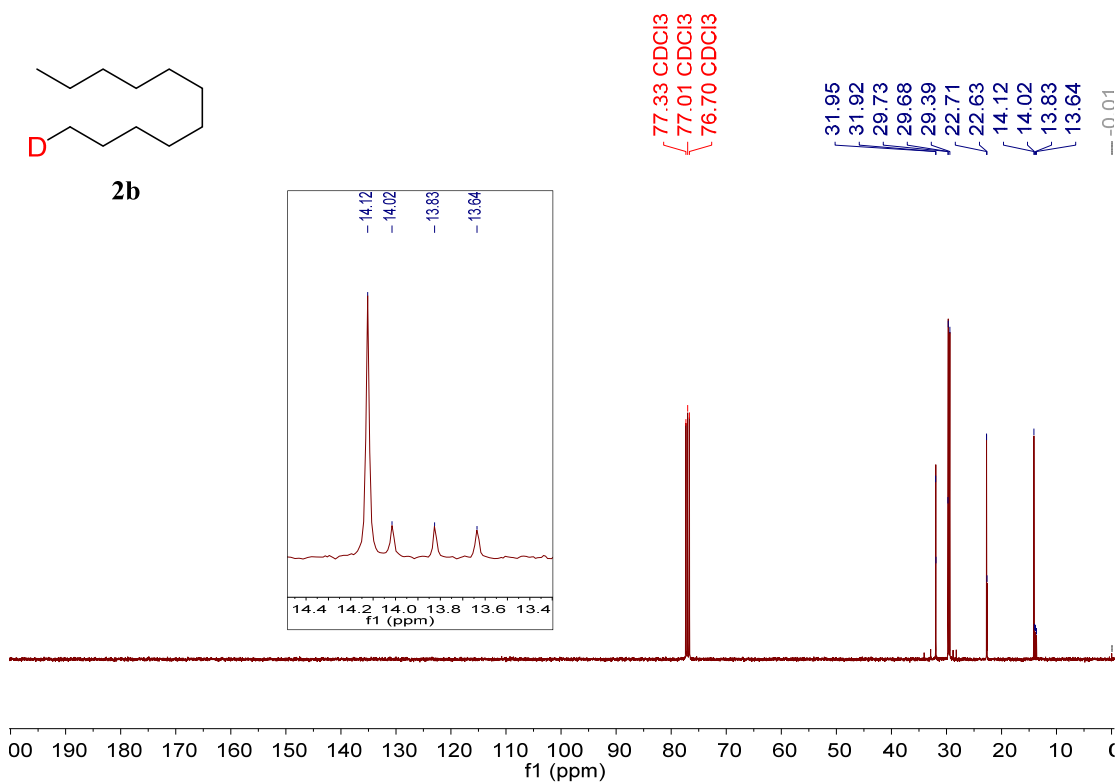

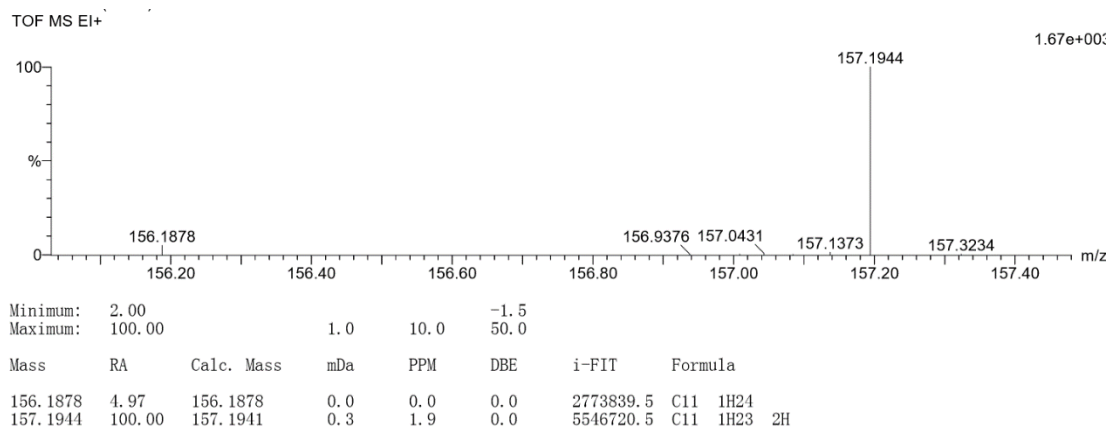

**Supplementary Fig. 49. NMR and HRMS spectra of Undecane-1-d (2b).** The splitting of C-D coupling in  $^{13}\text{C}$ -NMR was shown with an enlarged view.

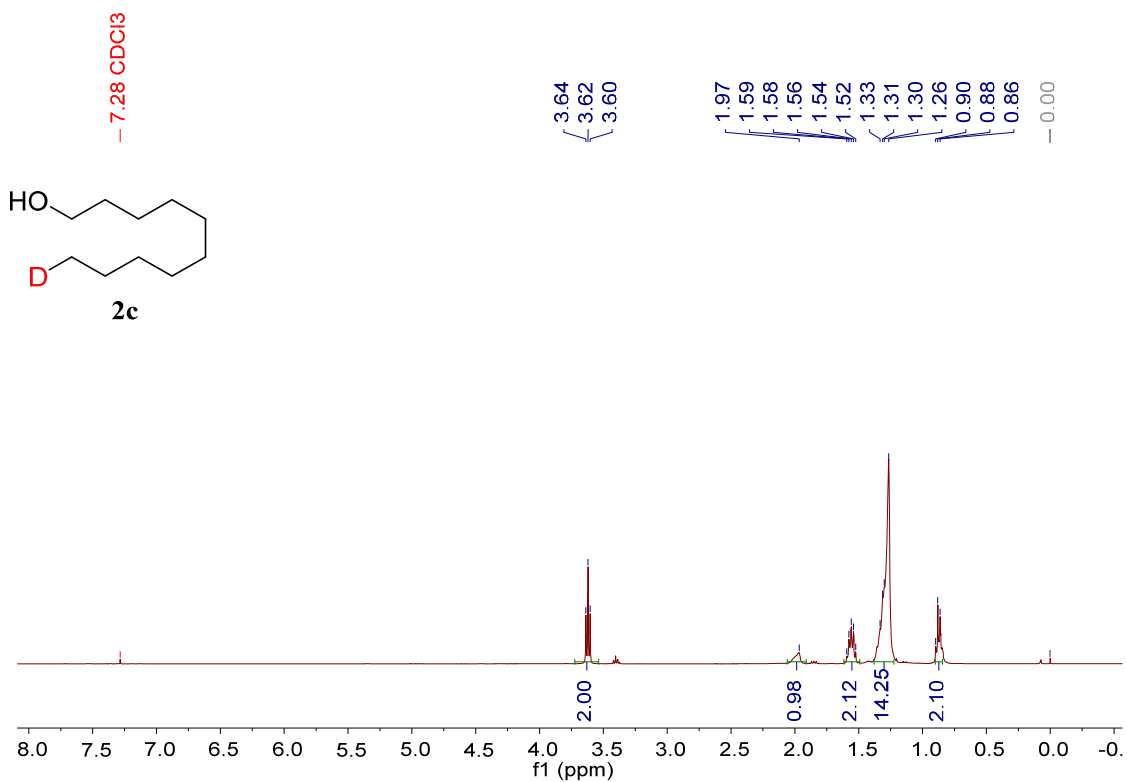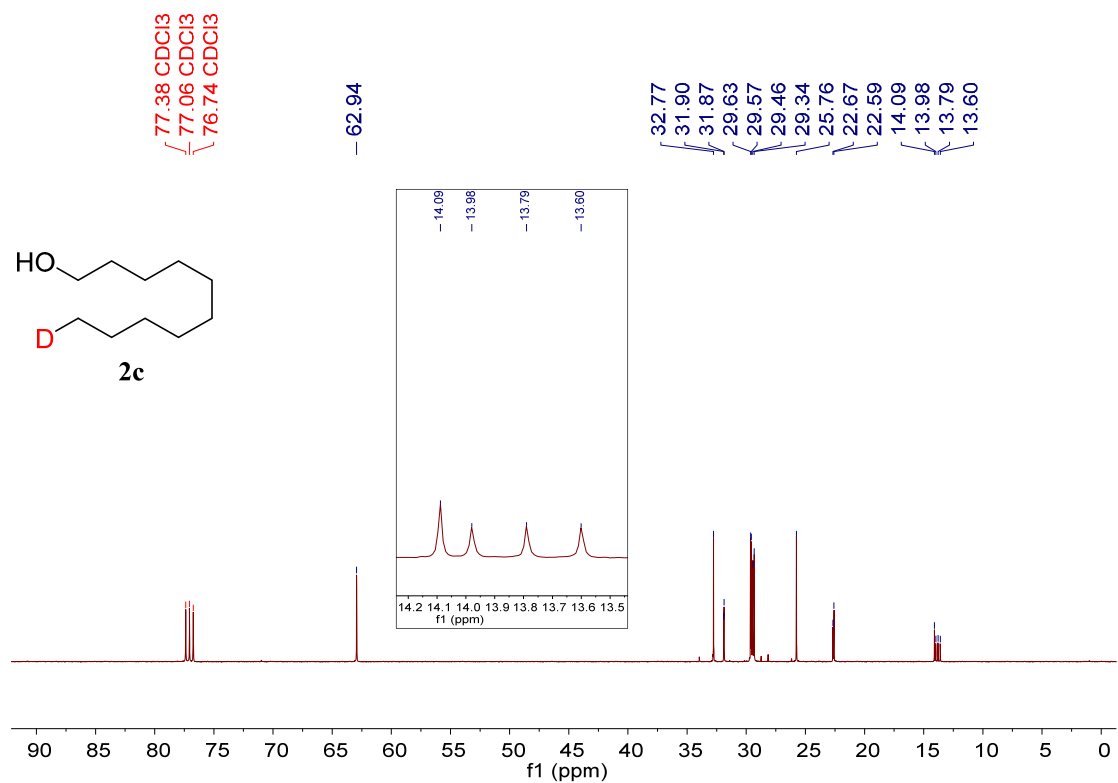

**Supplementary Fig. 50. NMR spectra of Decan-10-d-1-ol (2c).** The splitting of C-D coupling in <sup>13</sup>C-NMR was shown with an enlarged view.

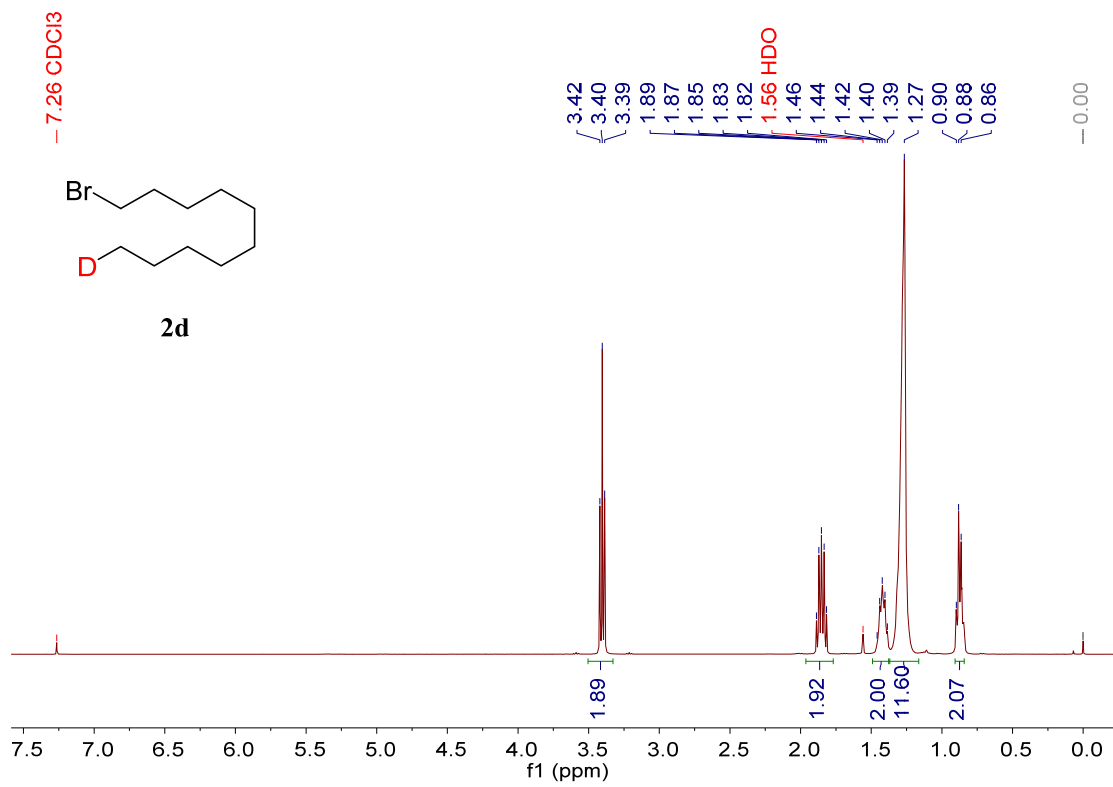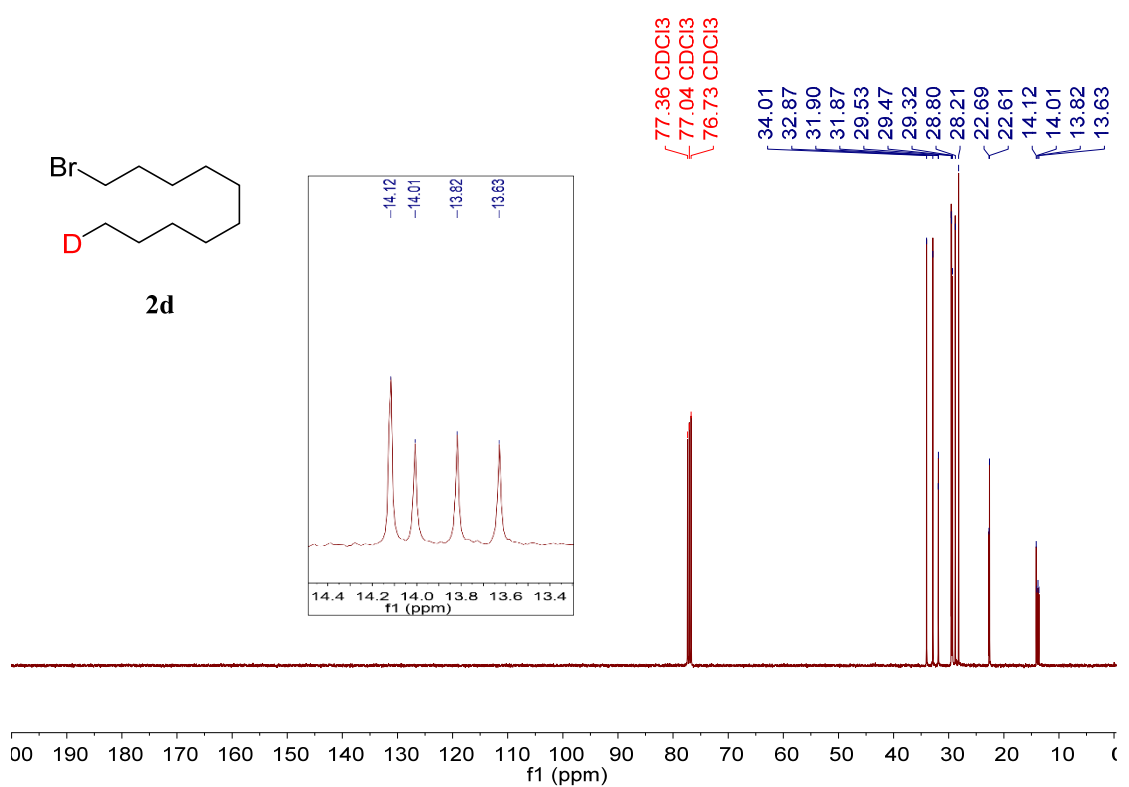

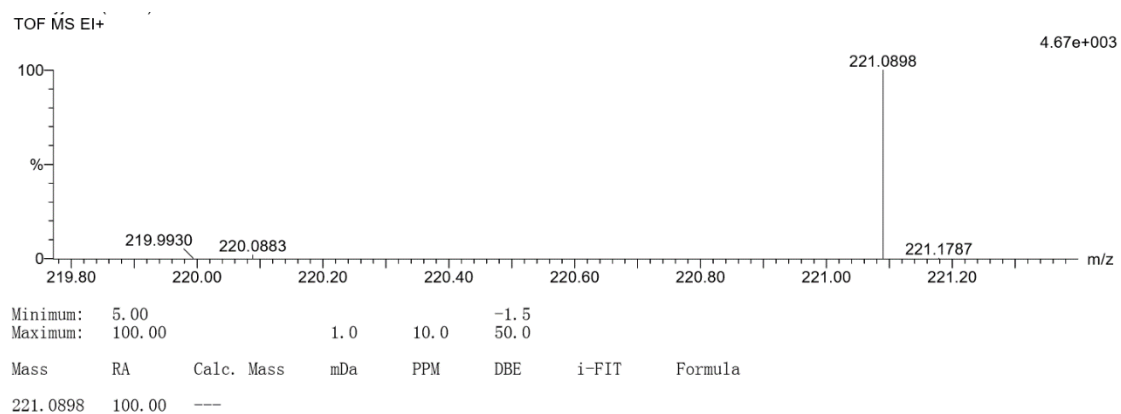

**Supplementary Fig. 51. NMR and HRMS spectra of 1-Bromodecane-10-d (2d).** The splitting of C-D coupling in  $^{13}\text{C}$ -NMR was shown with an enlarged view.

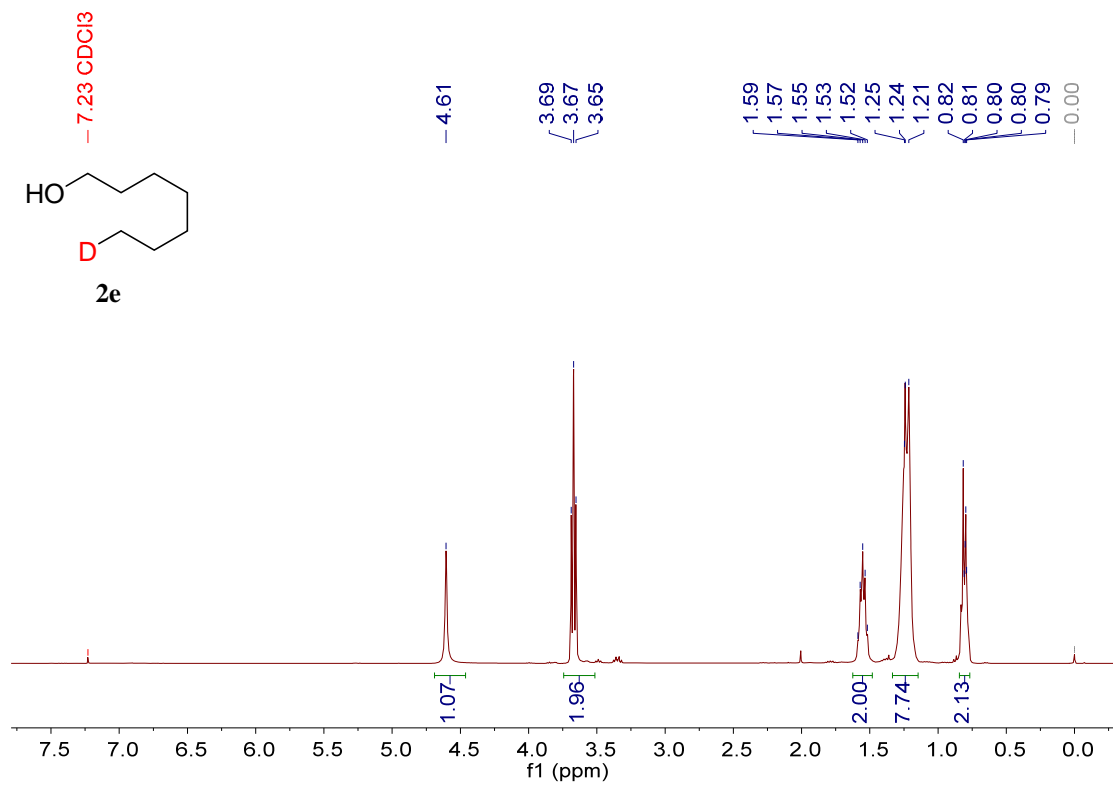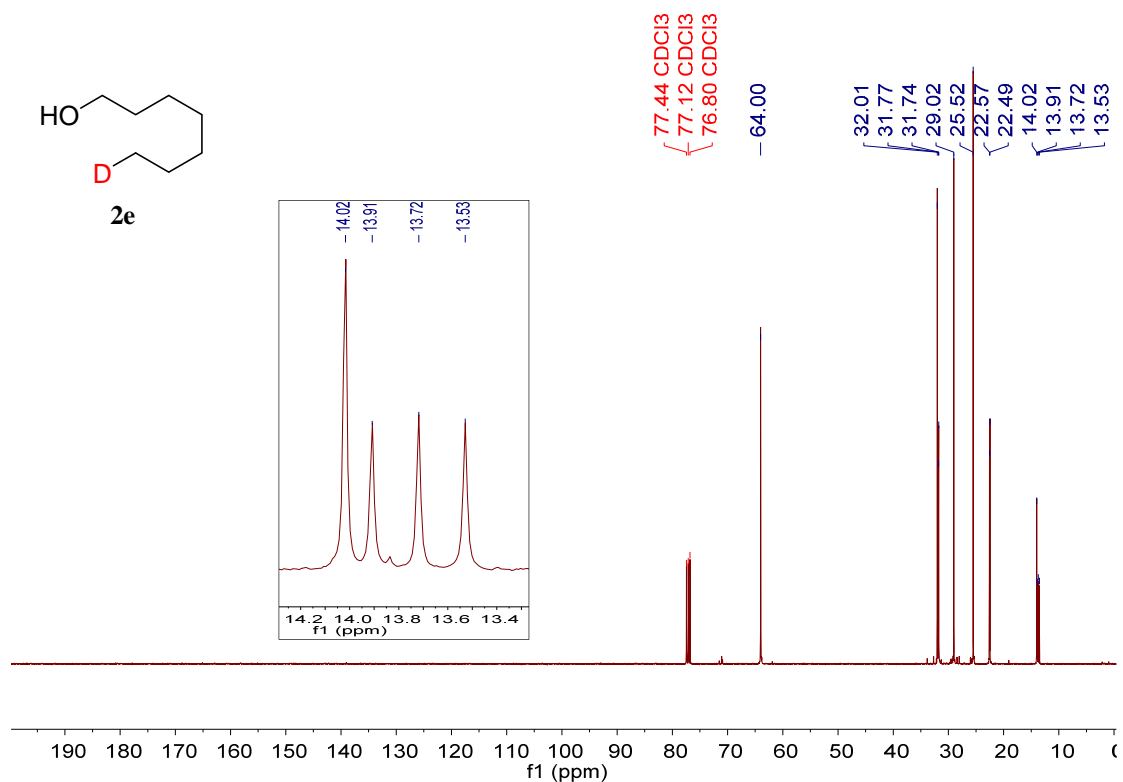

**Supplementary Fig. 52.** NMR spectra of Heptan-7-d-1-ol (2e). The splitting of C-D coupling in <sup>13</sup>C-NMR was shown with an enlarged view.

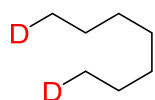

**2f**

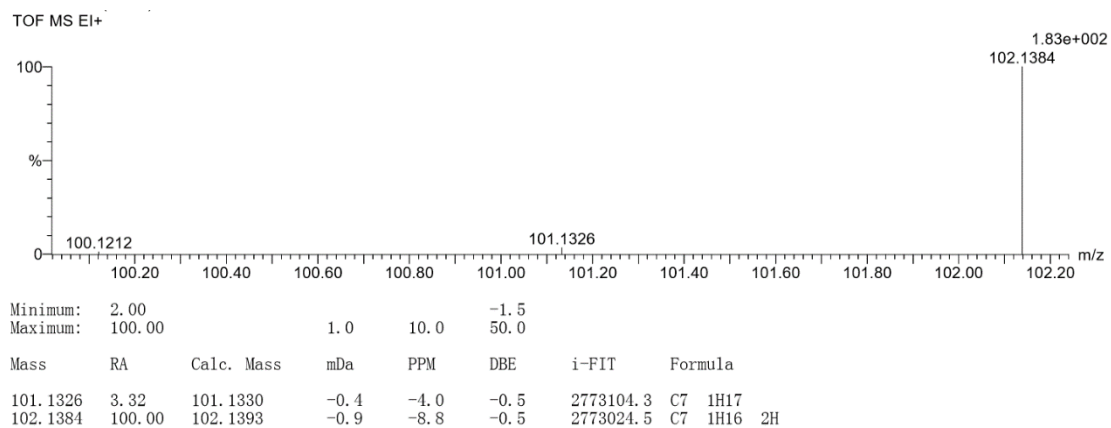

**Supplementary Fig. 53. HRMS spectrum of Heptane-1,7-d2 (2f).**



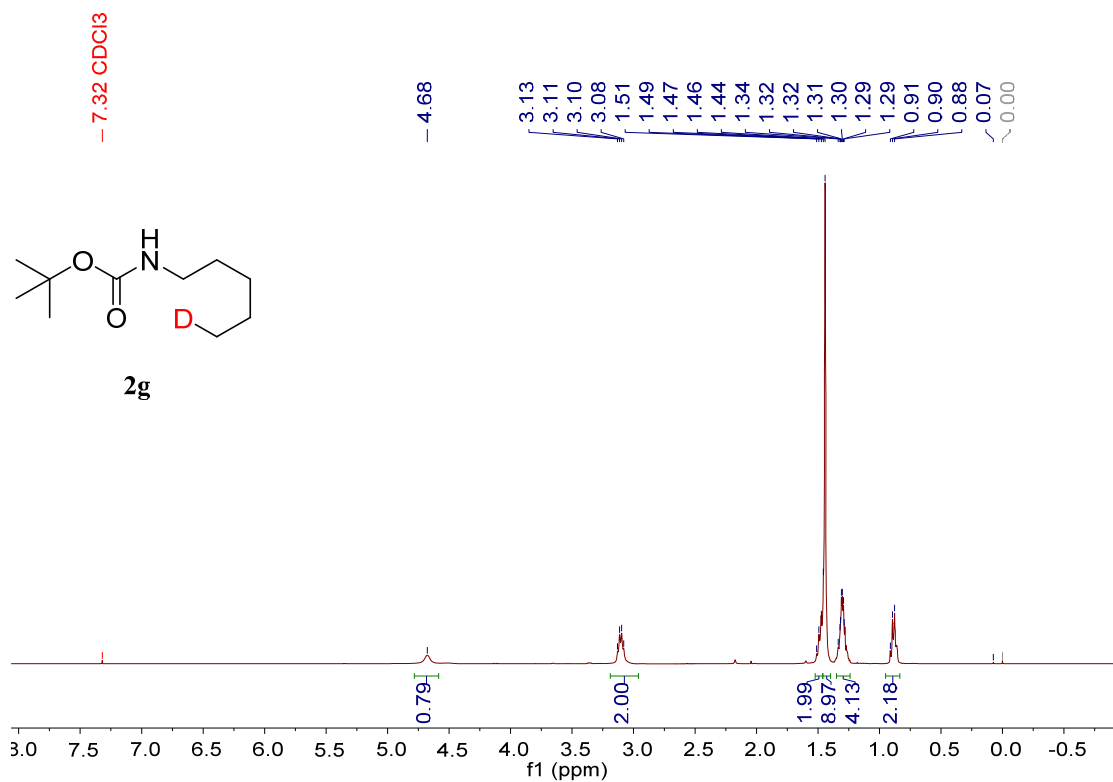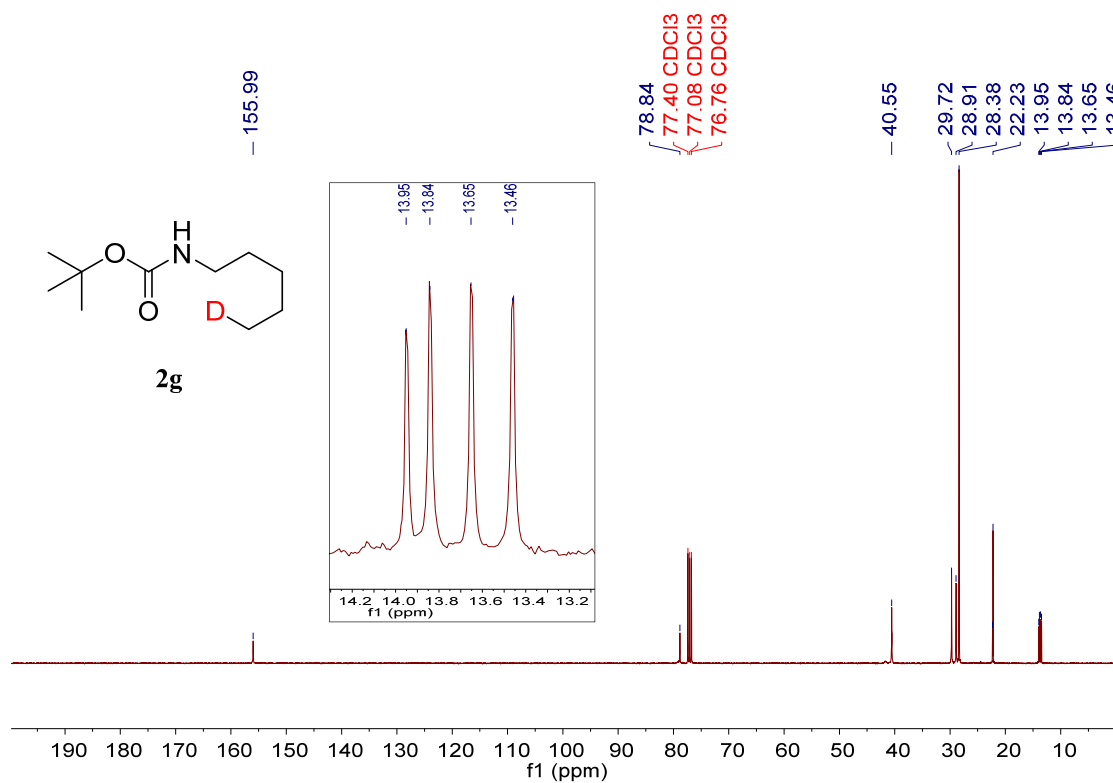

**Supplementary Fig. 54. NMR spectra of tert-Butyl (pentyl-5-d)carbamate (2g).** The splitting of C-D coupling in <sup>13</sup>C-NMR was shown with an enlarged view.

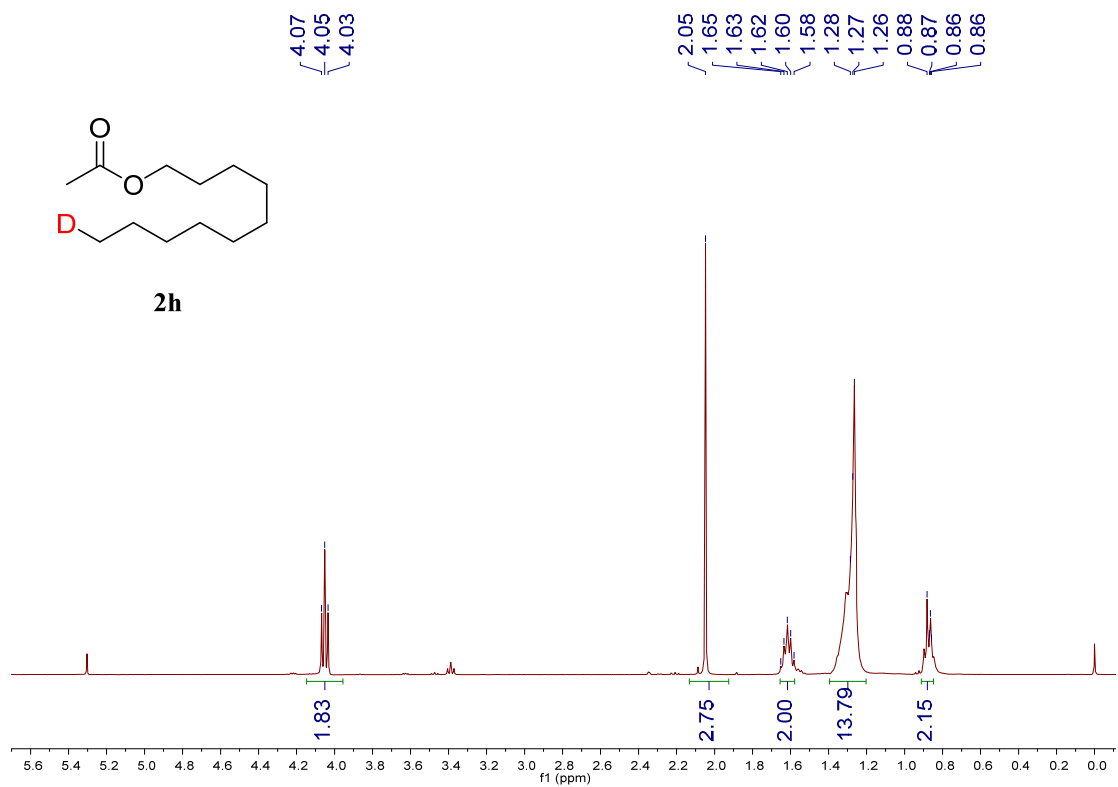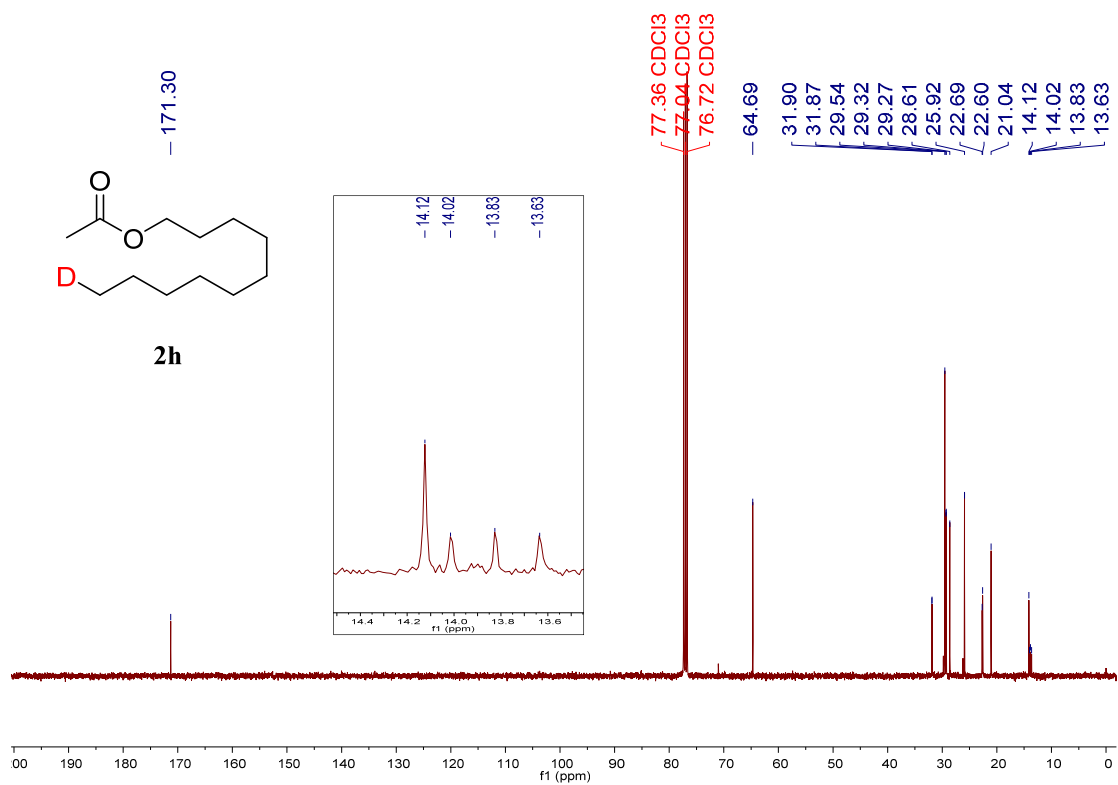

**Supplementary Fig. 55. NMR spectra of Decyl-10-d acetate (**2h**).** The splitting of C-D coupling in  $^{13}\text{C}$ -NMR was shown with an enlarged view.

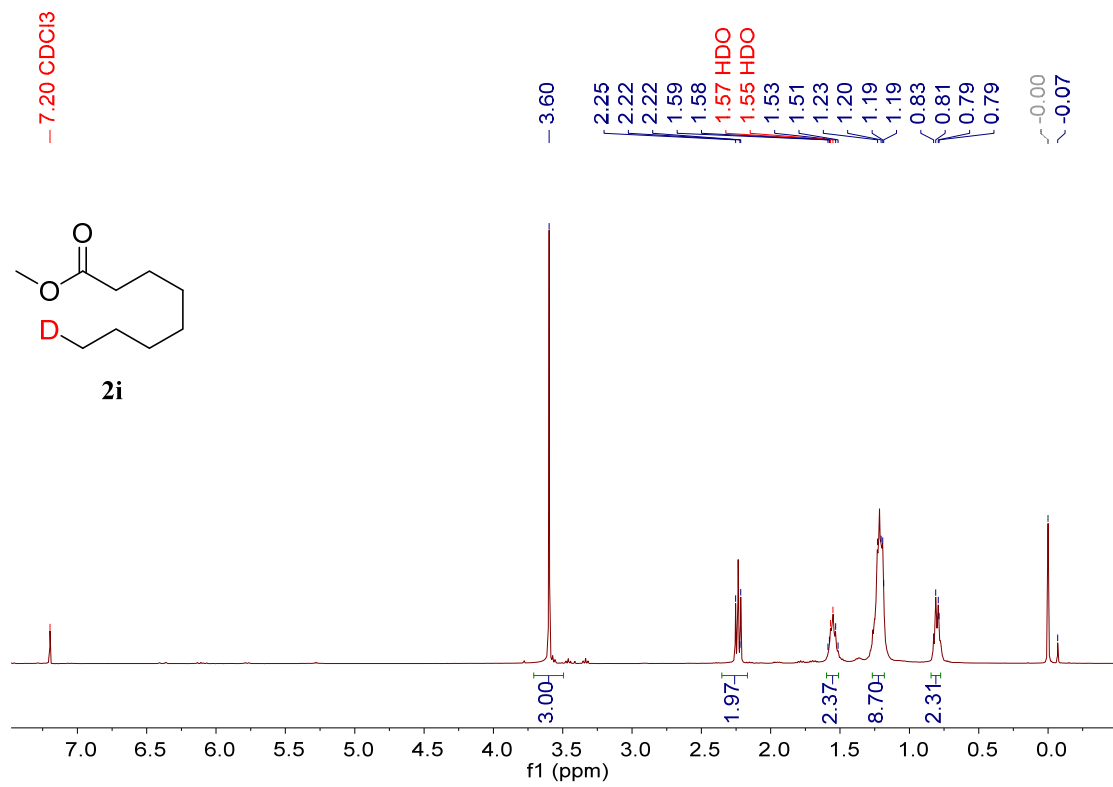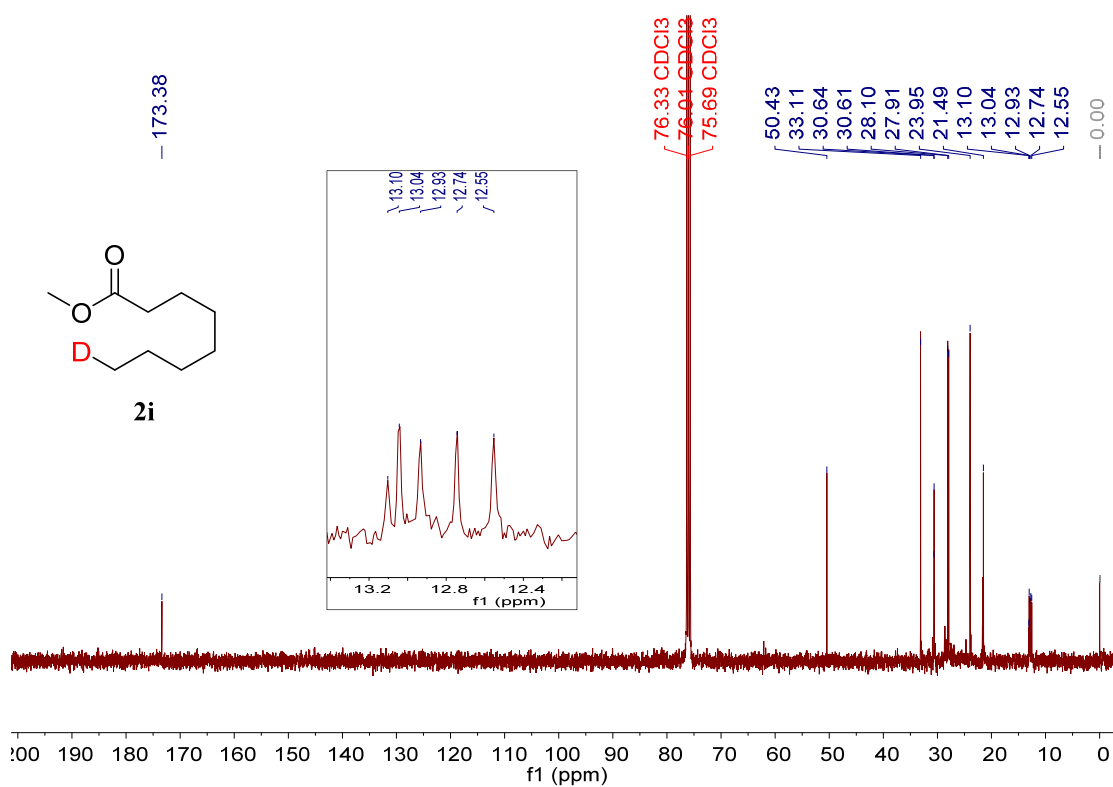

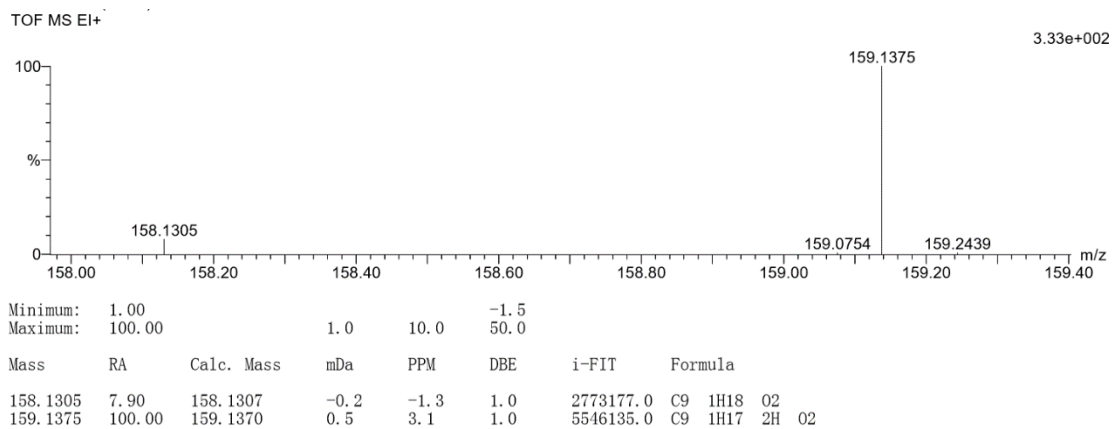

**Supplementary Fig. 56. NMR and HRMS spectra of Methyl octanoate-8-d (2i).** The splitting of C-D coupling in  $^{13}\text{C}$ -NMR was shown with an enlarged view.

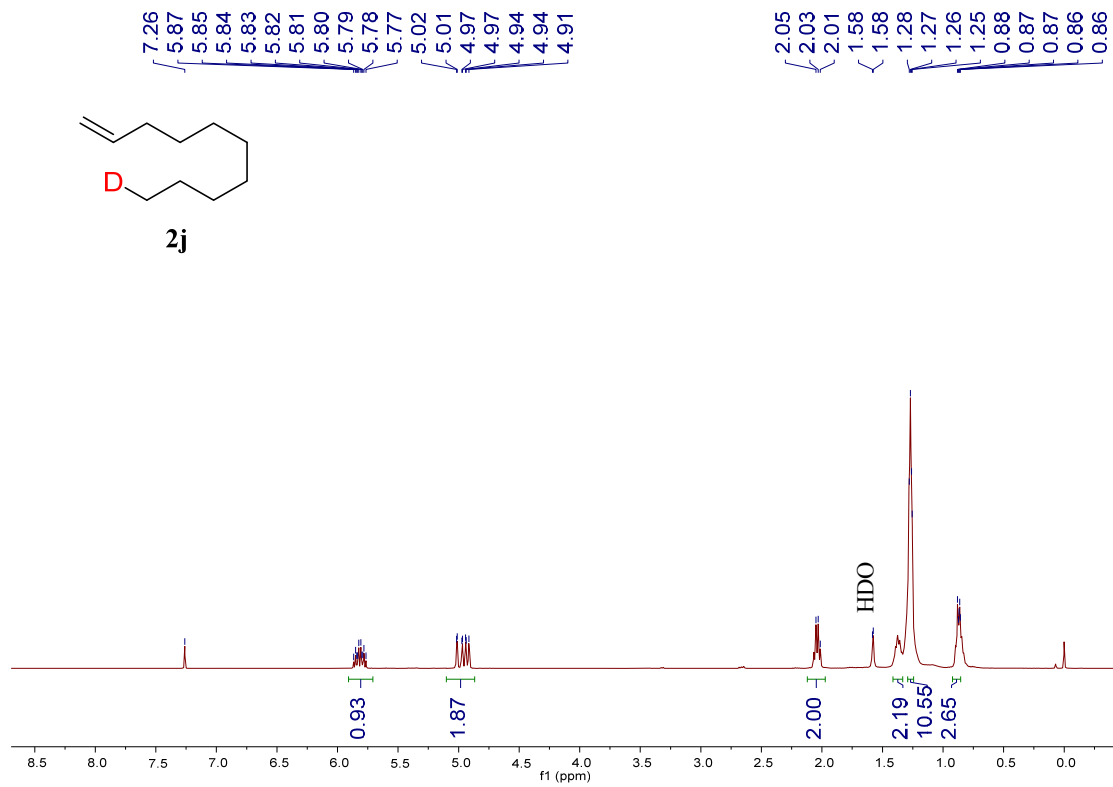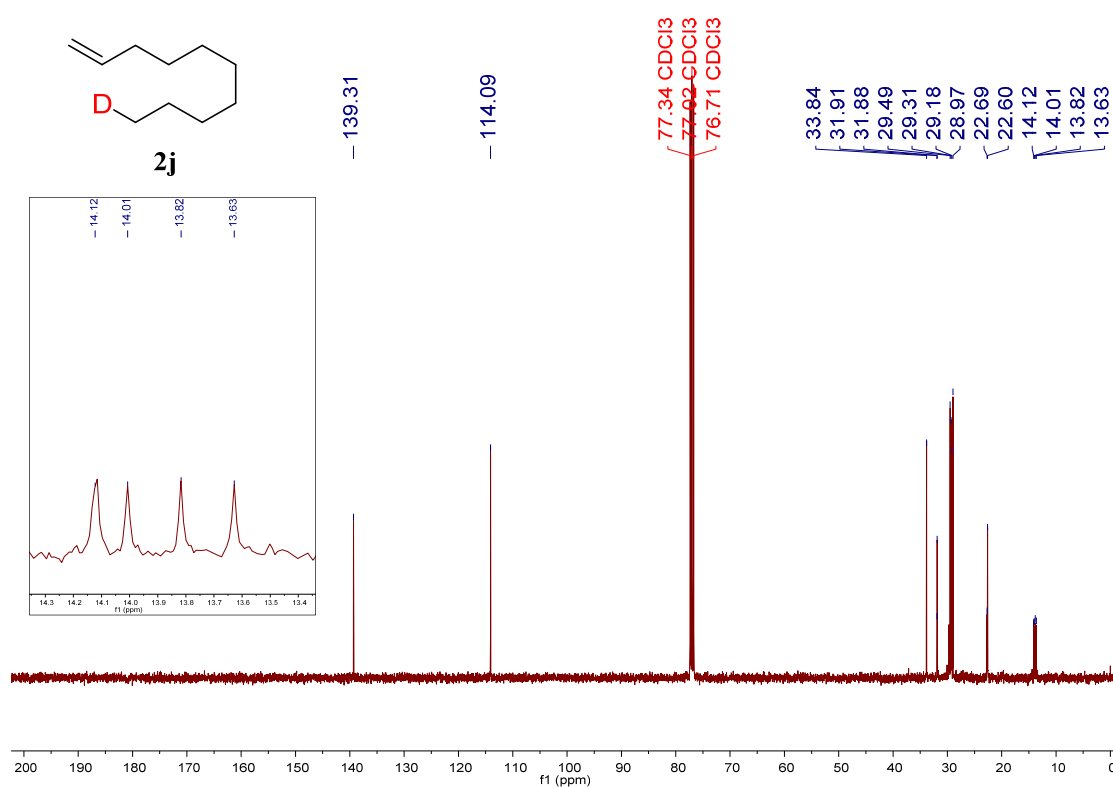

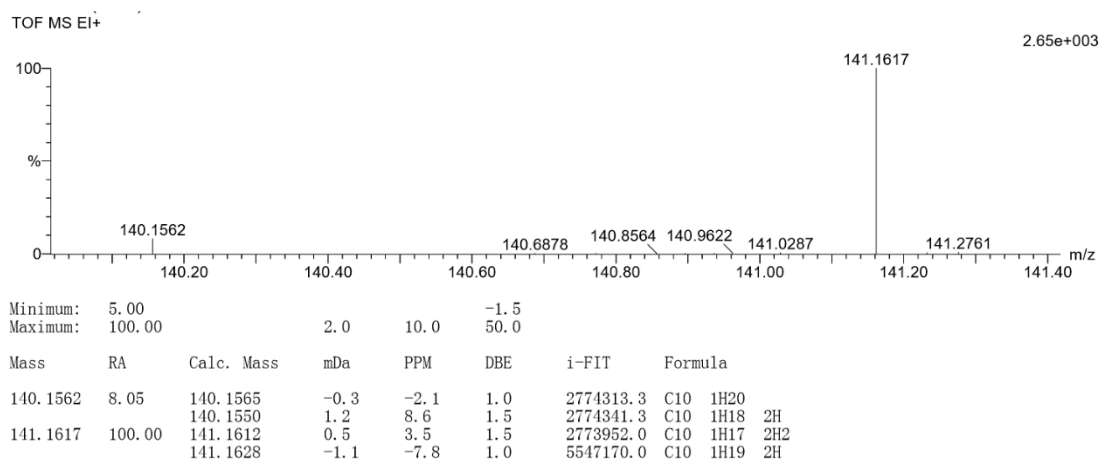

**Supplementary Fig. 57. NMR and HRMS spectra of Dec-1-ene-10-d (2j).** The splitting of C-D coupling in  $^{13}\text{C}$ -NMR was shown with an enlarged view.

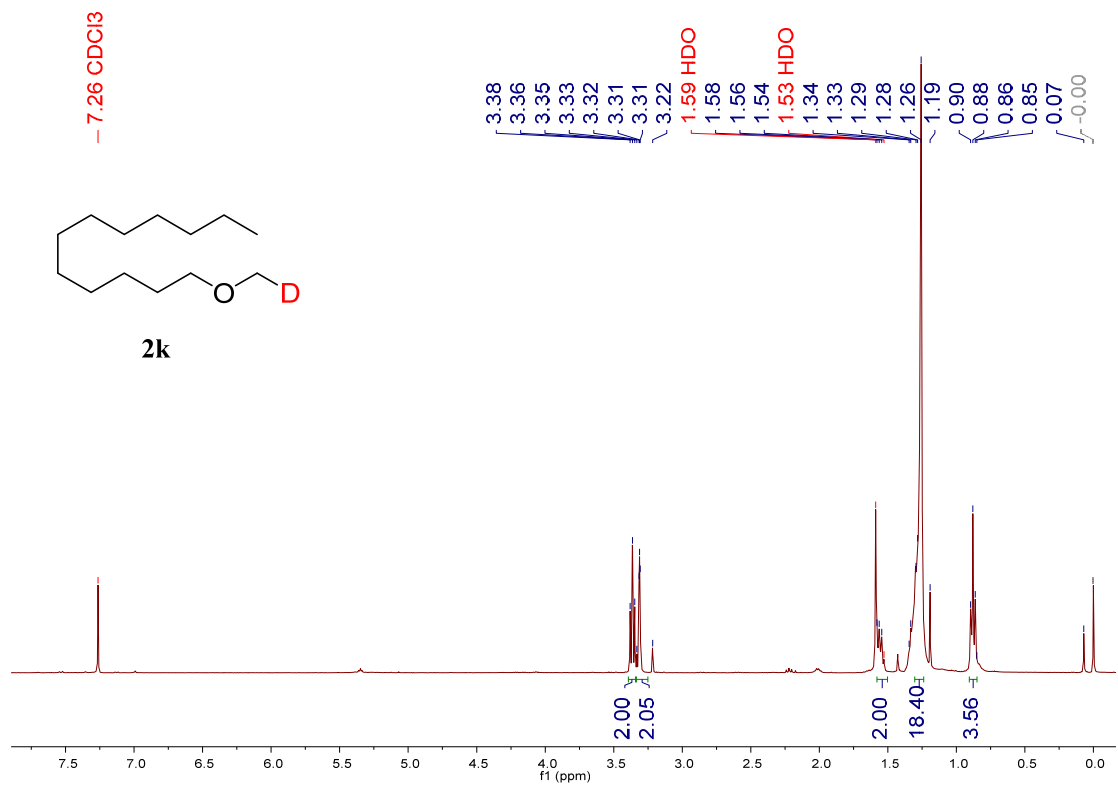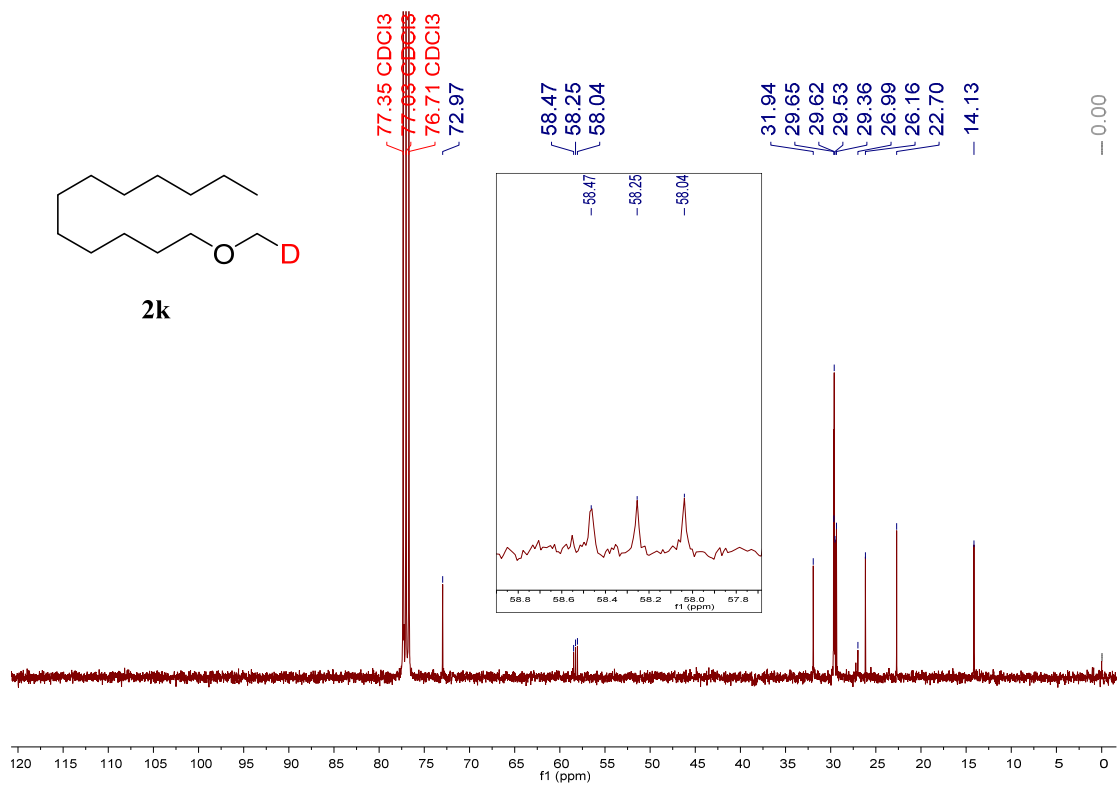

**Supplementary Fig. 58. NMR spectra of 1-(Methoxy-d)dodecane (**2k**).** The splitting of C-D coupling in <sup>13</sup>C-NMR was shown with an enlarged view.

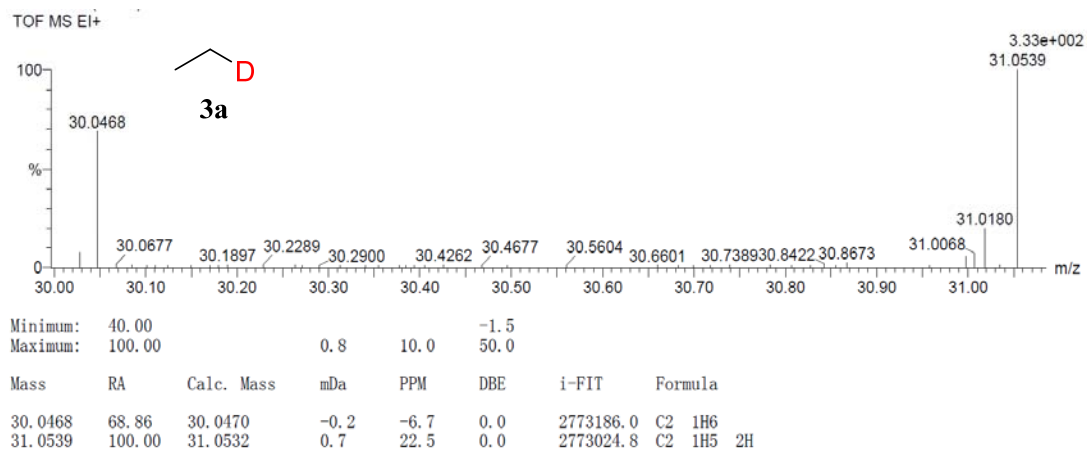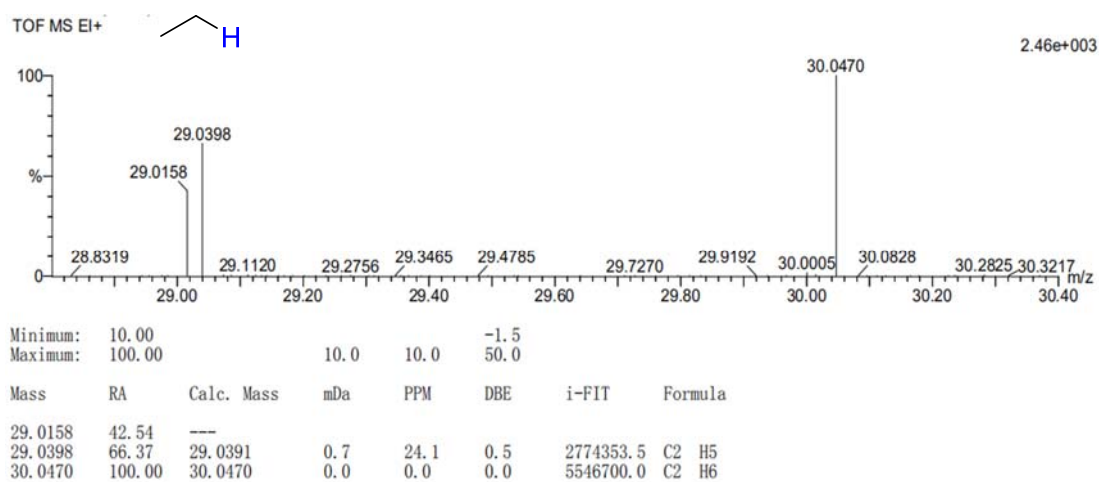

Supplementary Fig. 59. HRMS spectra of Ethane-d (3a) and Ethane without deuterium.



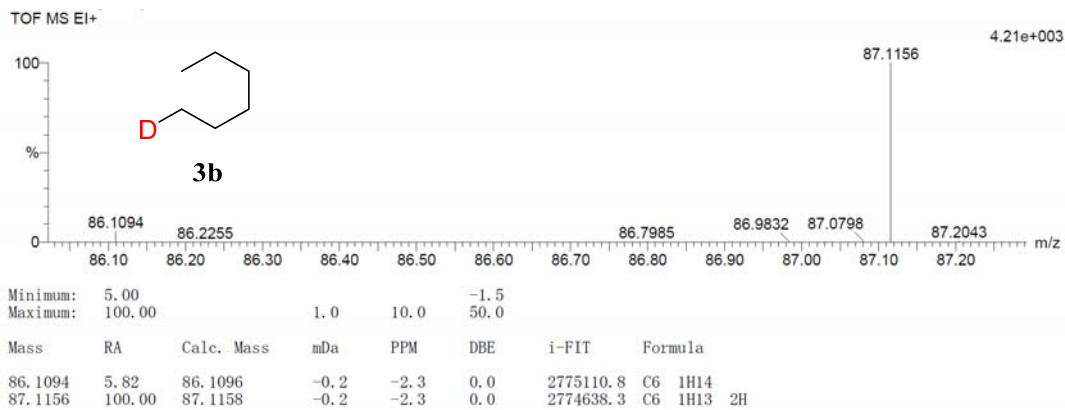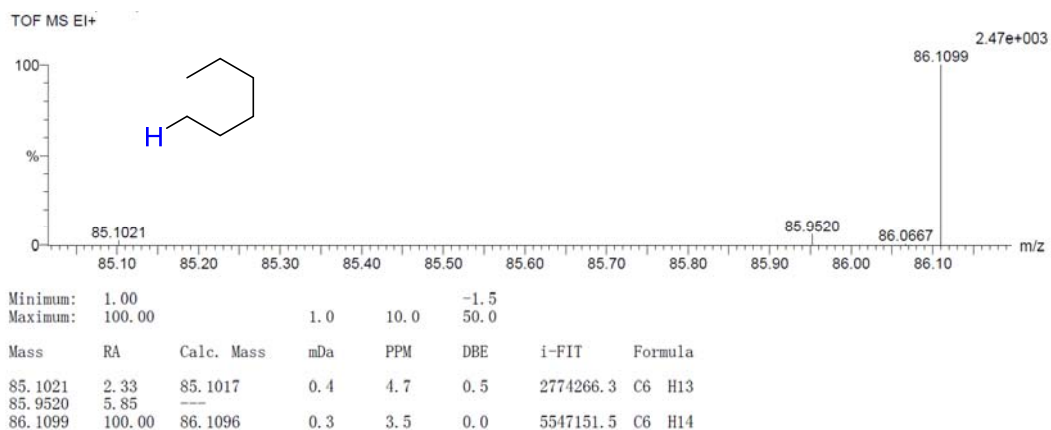

Supplementary Fig. 60. HRMS spectra of Hexane-1-d (3b) and Hexane without deuterium.

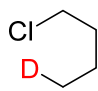

**3c**

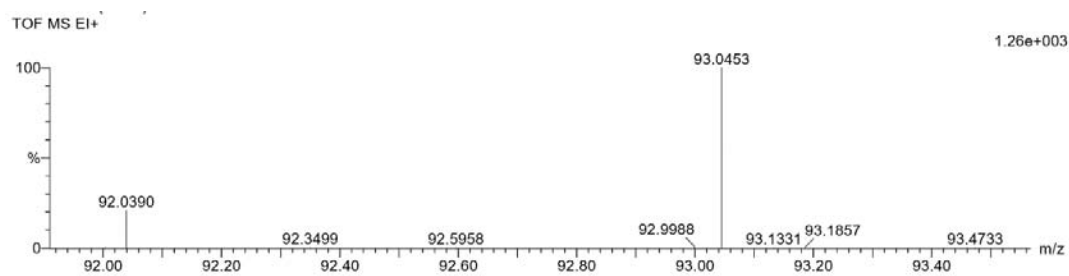

| Mass    | RA     | Calc. Mass | mDa  | PPM  | DBE | i-FIT     | Formula      |
|---------|--------|------------|------|------|-----|-----------|--------------|
| 92.0390 | 20.77  | 92.0393    | -0.3 | -3.3 | 0.0 | 2773768.5 | C4 1H9 Cl    |
| 93.0453 | 100.00 | 93.0456    | -0.3 | -3.2 | 0.0 | 5546658.5 | C4 1H8 2H Cl |

**Supplementary Fig. 61. HRMS spectrum of 1-Chlorobutane-4-d (3c).**

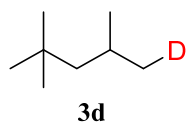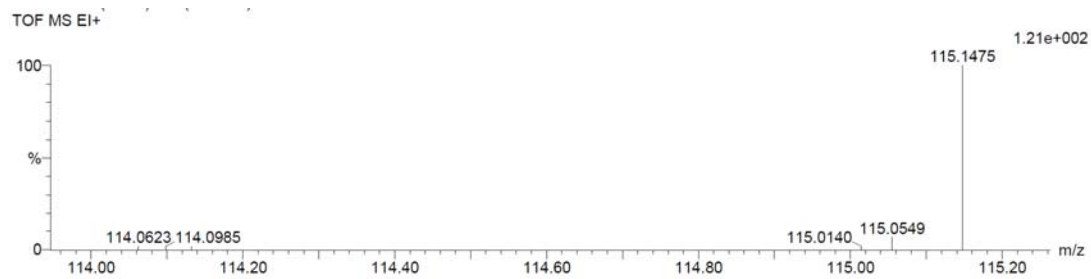

| Minimum: | 2.00   |            |     |      |      |           |           |      |
|----------|--------|------------|-----|------|------|-----------|-----------|------|
| Maximum: | 100.00 |            | 1.0 | 10.0 | -1.5 |           |           | 50.0 |
| Mass     | RA     | Calc. Mass | mDa | PPM  | DBE  | i-FIT     | Formula   |      |
| 115.0549 | 6.67   | 115.0548   | 0.1 | 0.9  | 6.5  | 5546025.5 | C9 H7     |      |
| 115.1475 | 100.00 | 115.1471   | 0.4 | 3.5  | 0.0  | 2773019.0 | C8 H17 2H |      |

**Supplementary Fig. 62. HRMS spectrum of 2, 2, 4-Trimethylpentane-5-d (3d).**

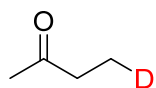

**3e**

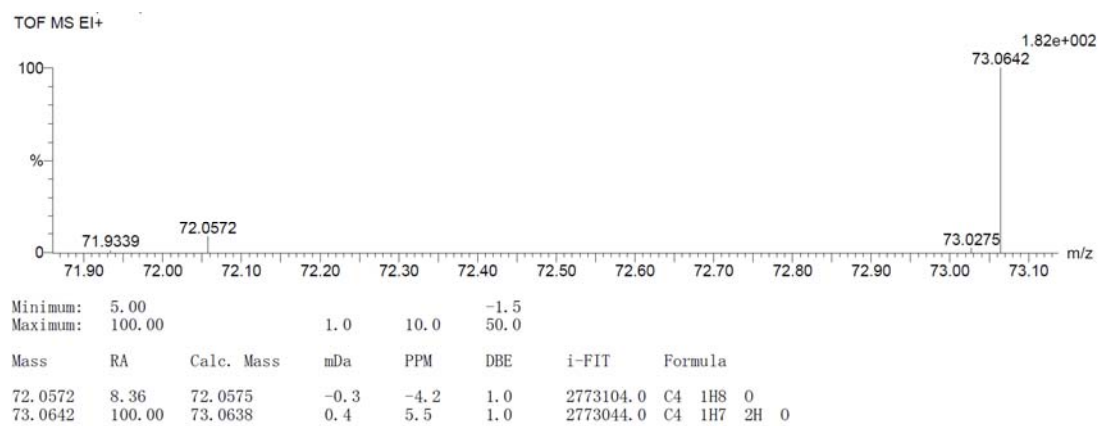

**Supplementary Fig. 63. HRMS spectrum of Butan-2-one-4-d (3e).**

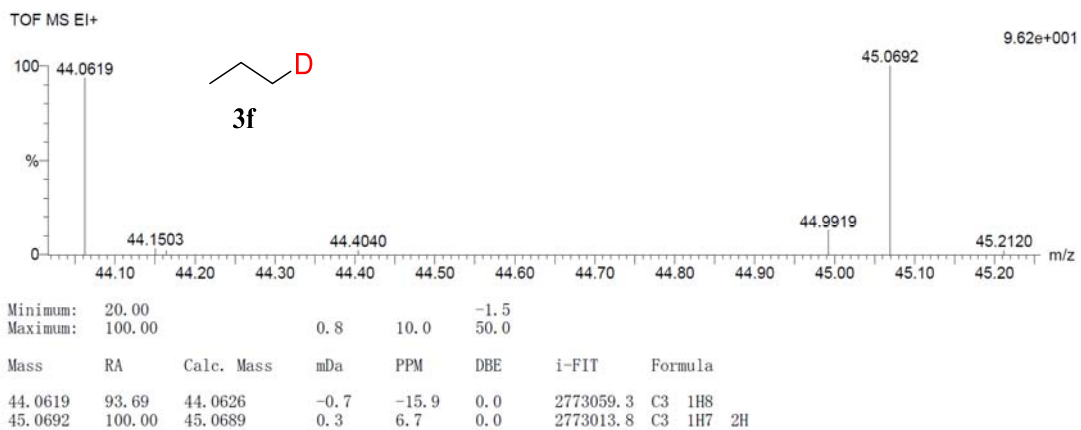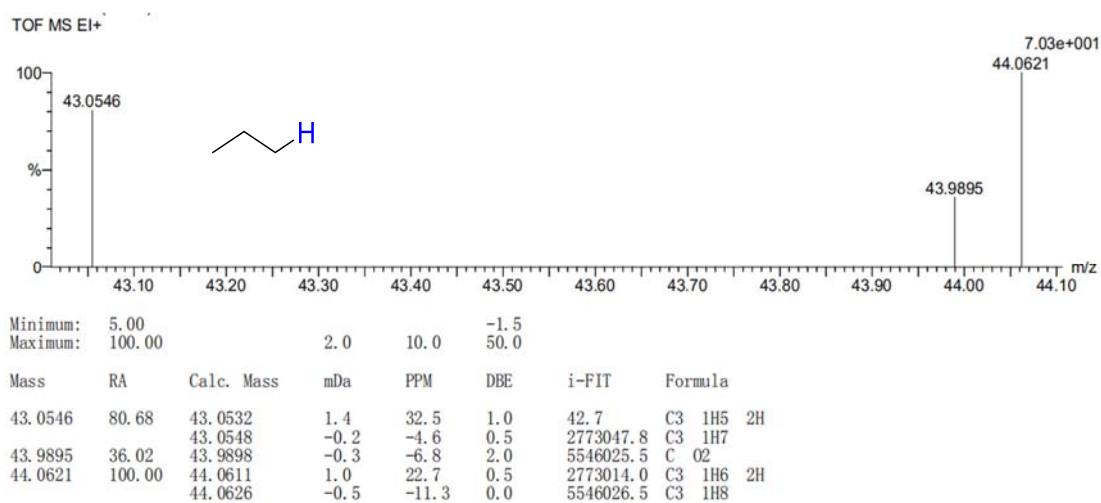

Supplementary Fig. 64. HRMS spectra of Propane-1-d (3f) and Propane without deuterium.

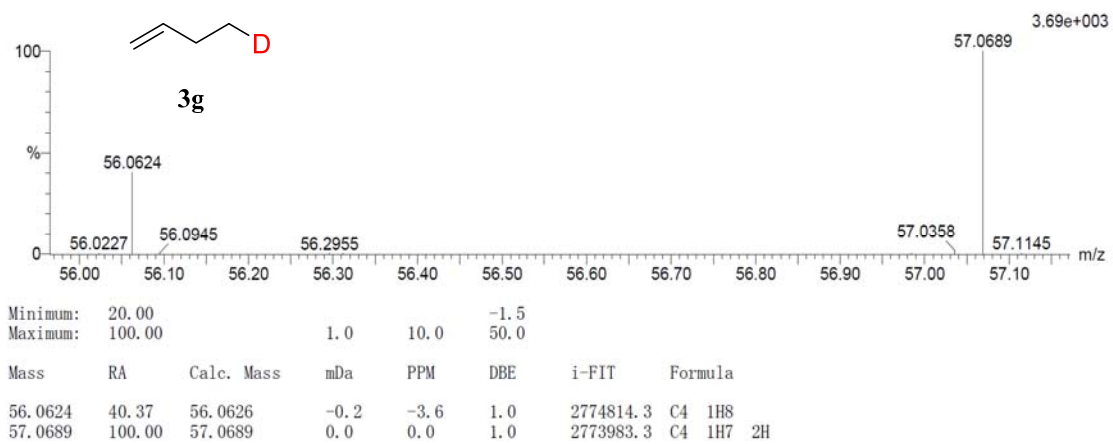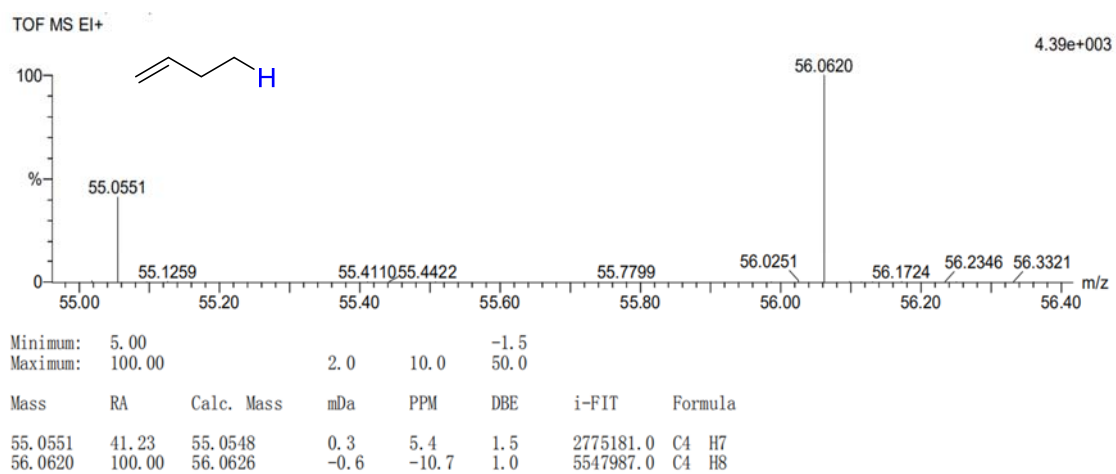

Supplementary Fig. 65. HRMS spectra of But-1-ene-4-d (3g) and Butene without deuterium.

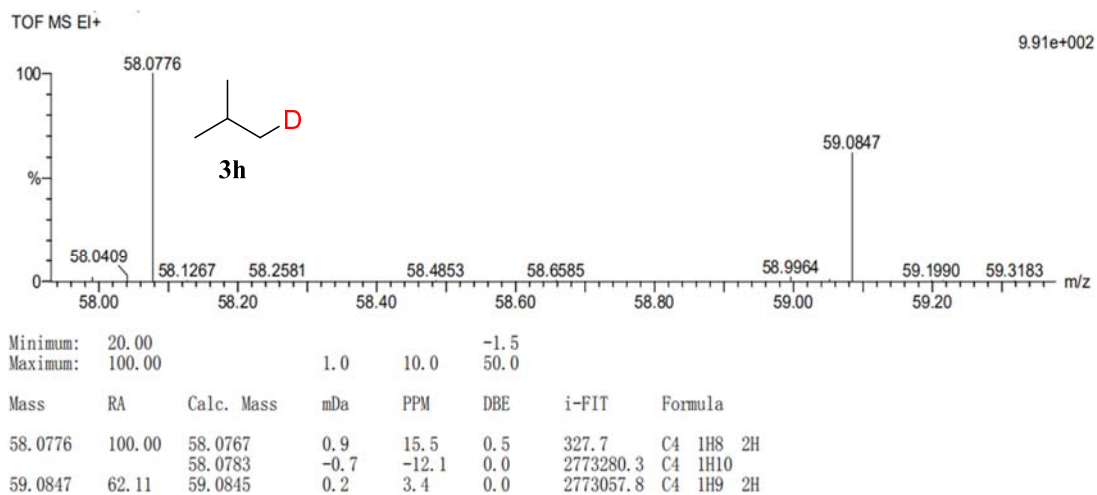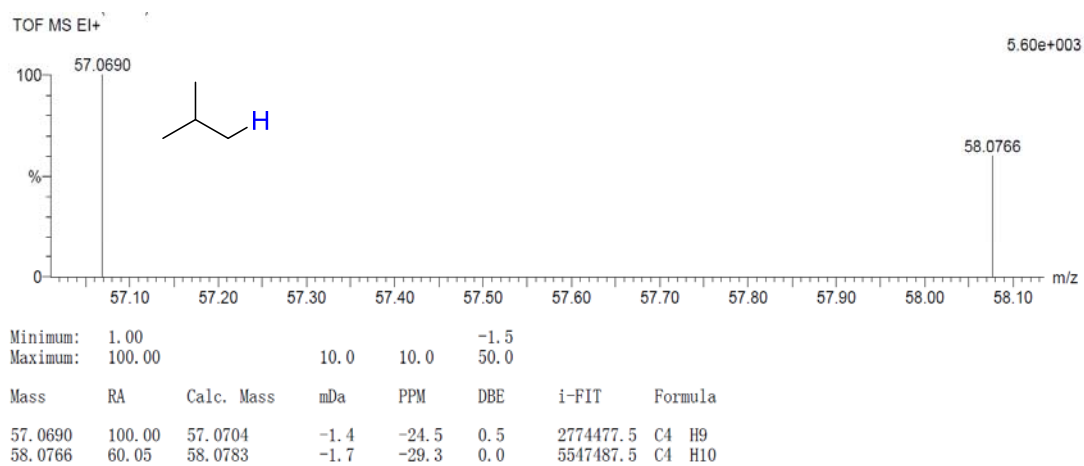

**Supplementary Fig. 66. HRMS spectra of Isobutane-1-d (3h) and Isobutane without deuterium.**

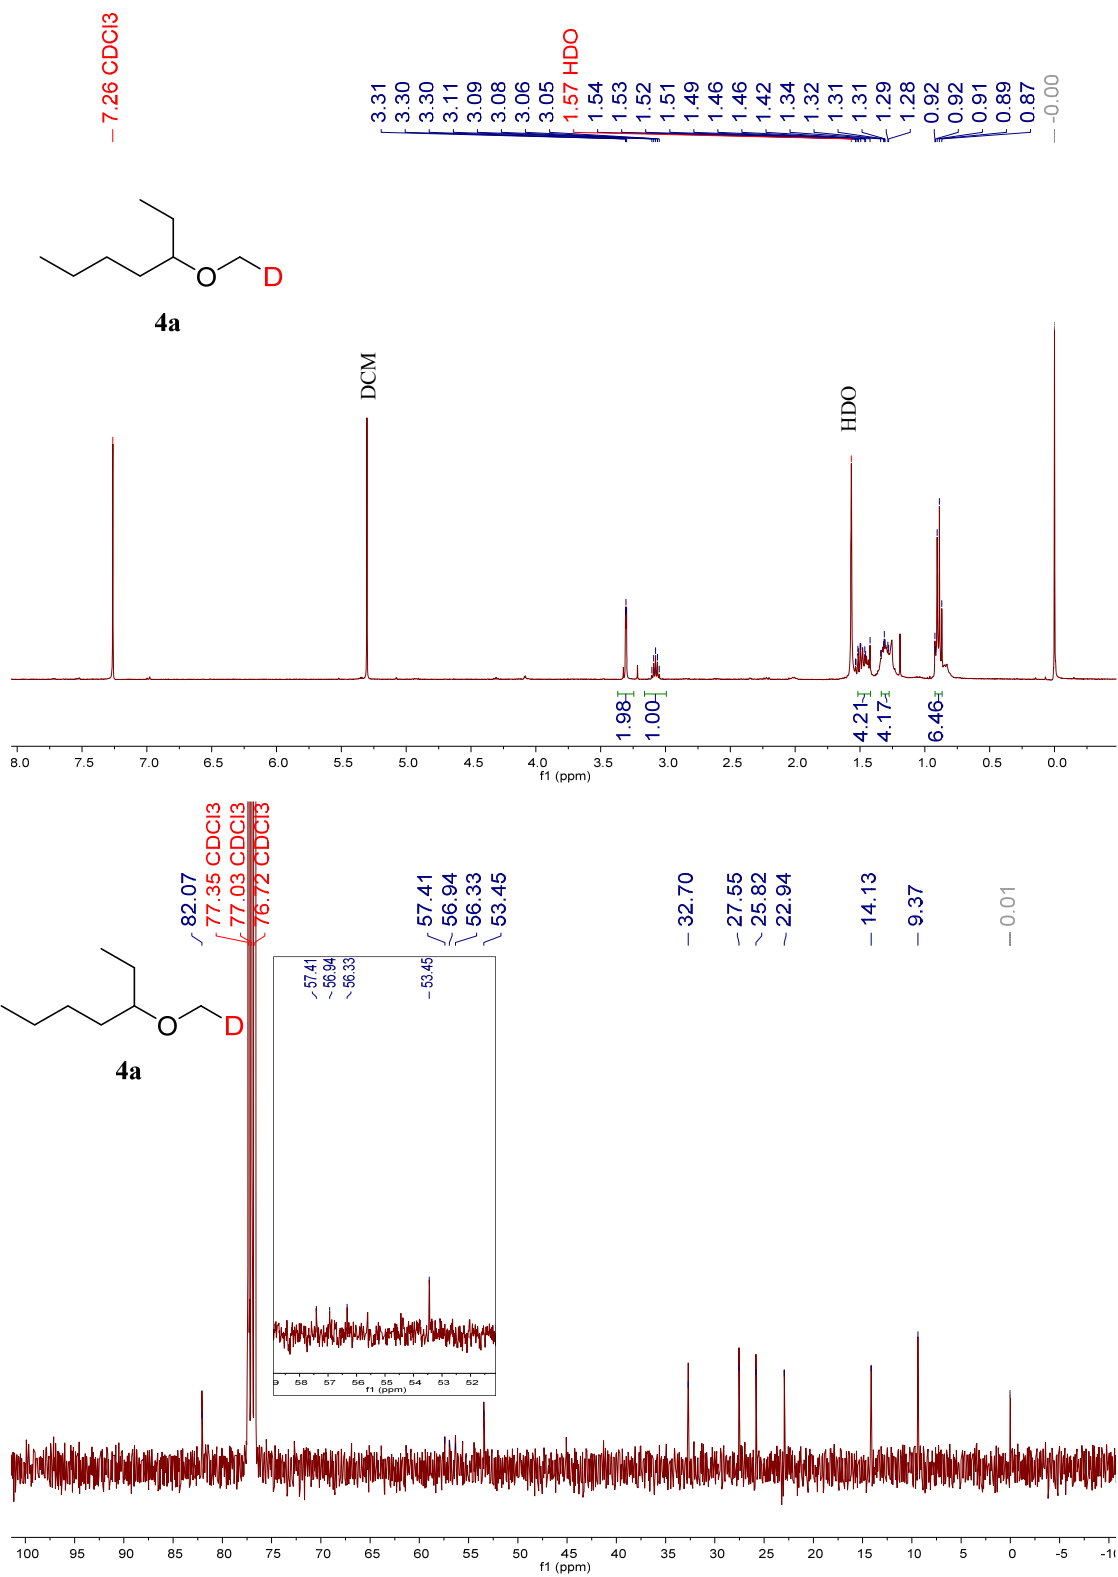

**Supplementary Fig. 67.** NMR spectra of 3-(Methoxy-d)heptane (4a). The splitting of C-D coupling in  $^{13}\text{C}$ -NMR was shown with an enlarged view.



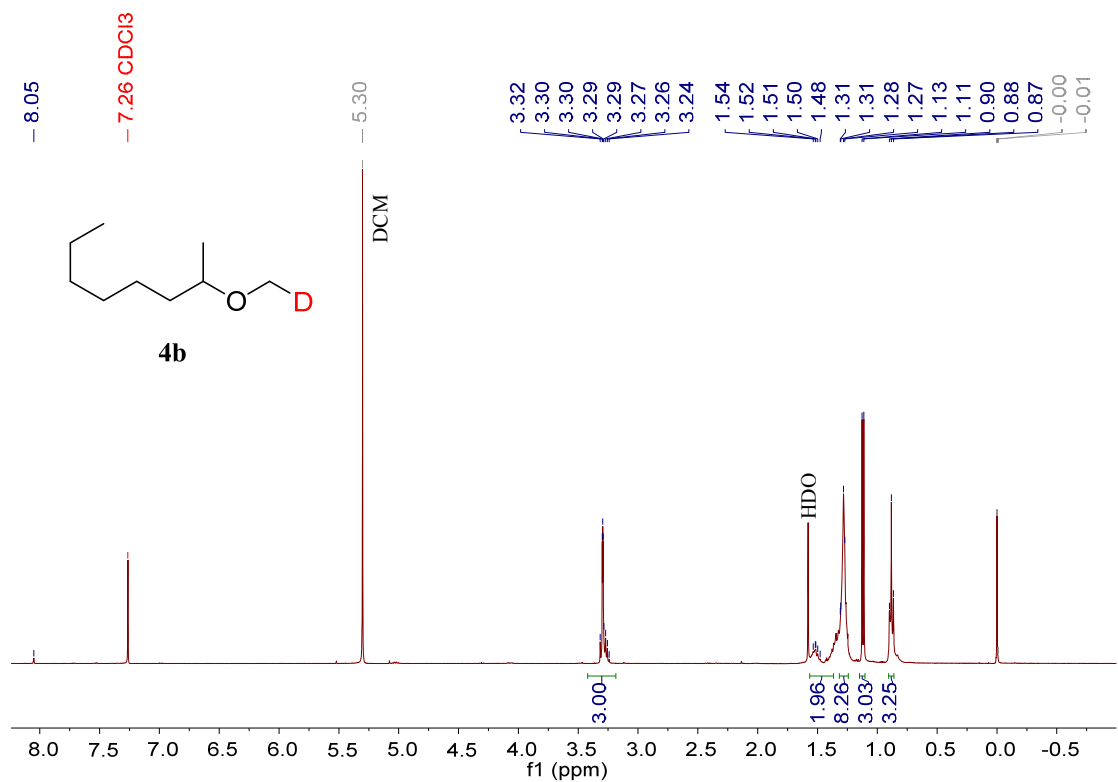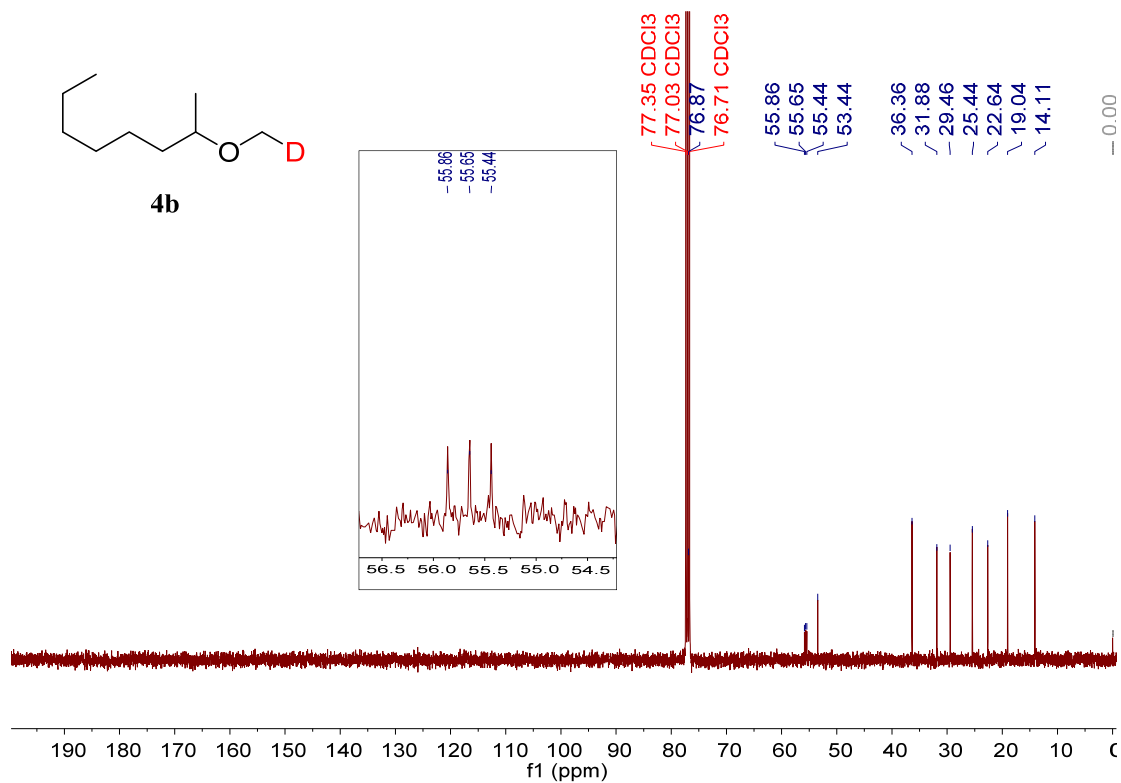

**Supplementary Fig. 68.** NMR spectra of 2-(Methoxy-d)octane (**4b**). The splitting of C-D coupling in <sup>13</sup>C-NMR was shown with an enlarged view.

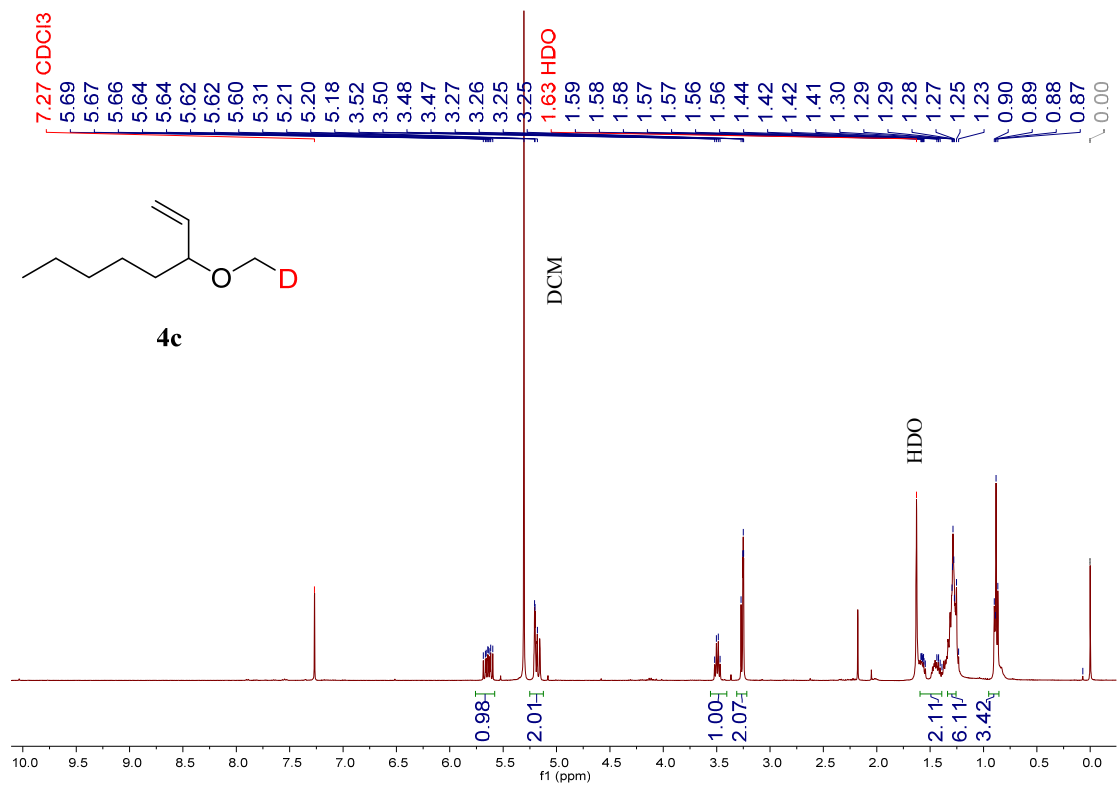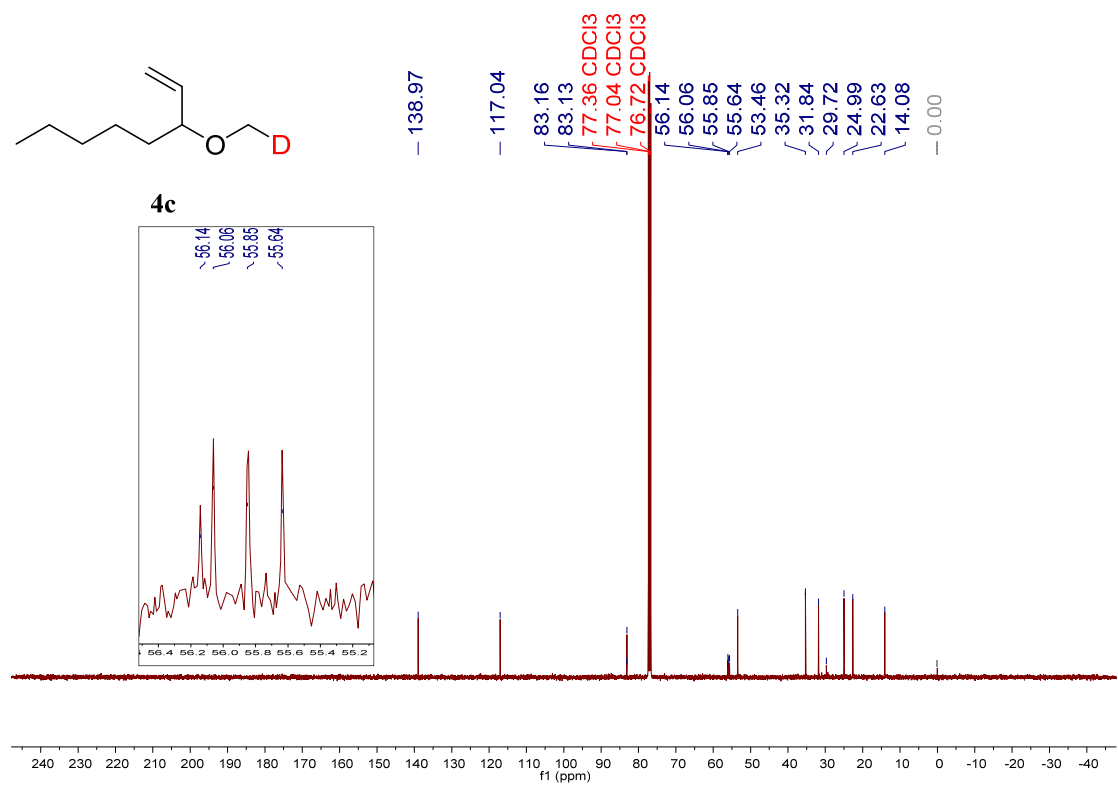

**Supplementary Fig. 69.** NMR spectra of 3-(Methoxy-d)oct-1-ene (**4c**). The splitting of C-D coupling in <sup>13</sup>C-NMR was shown with an enlarged view.

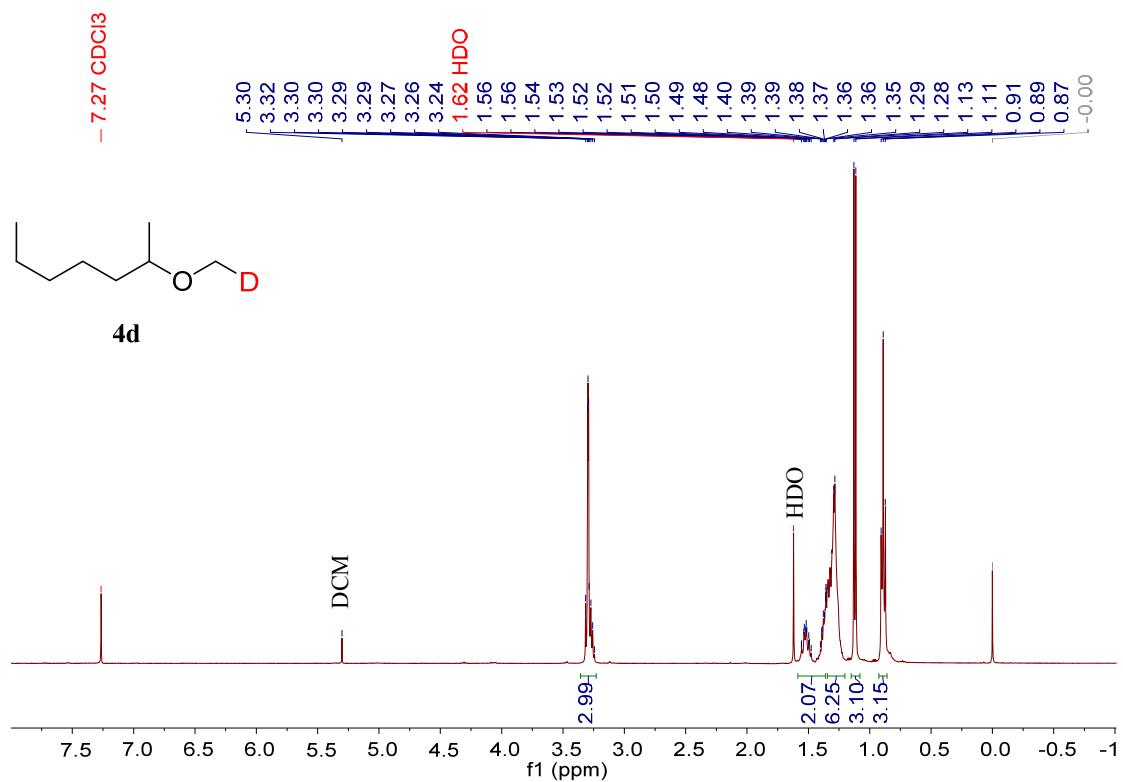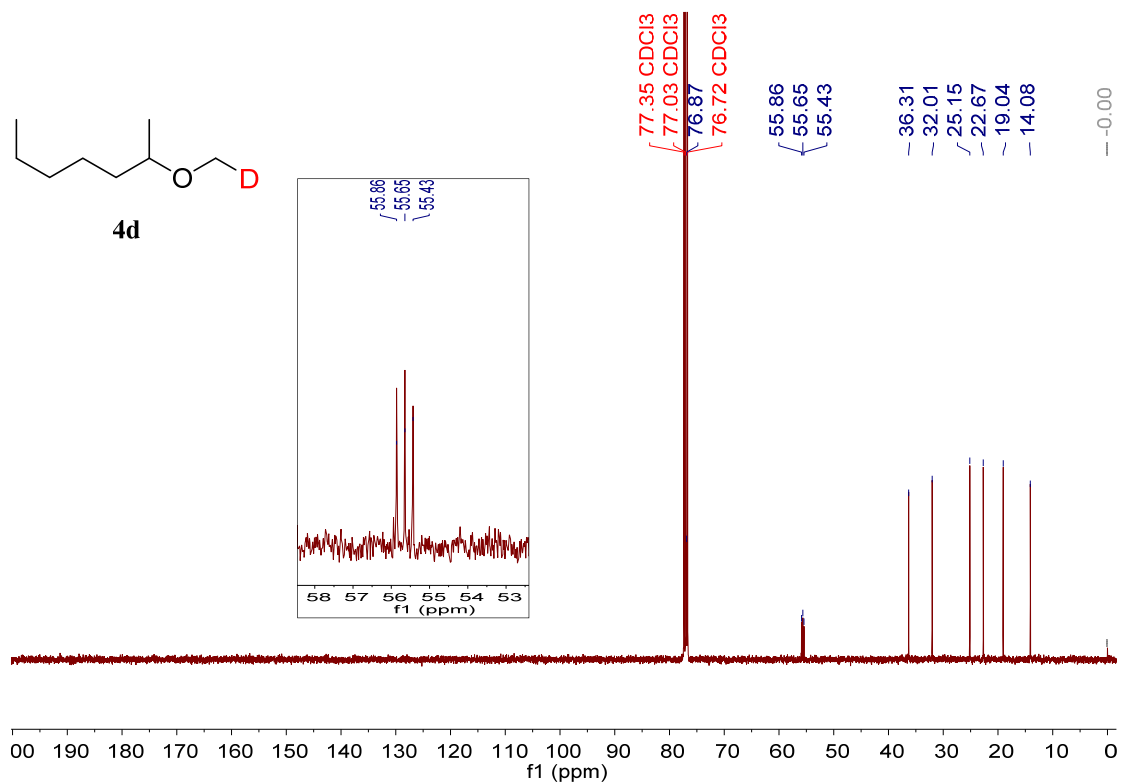

**Supplementary Fig. 70.** NMR spectra of 2-(Methoxy-d)heptane (4d). The splitting of C-D coupling in <sup>13</sup>C-NMR was shown with an enlarged view.

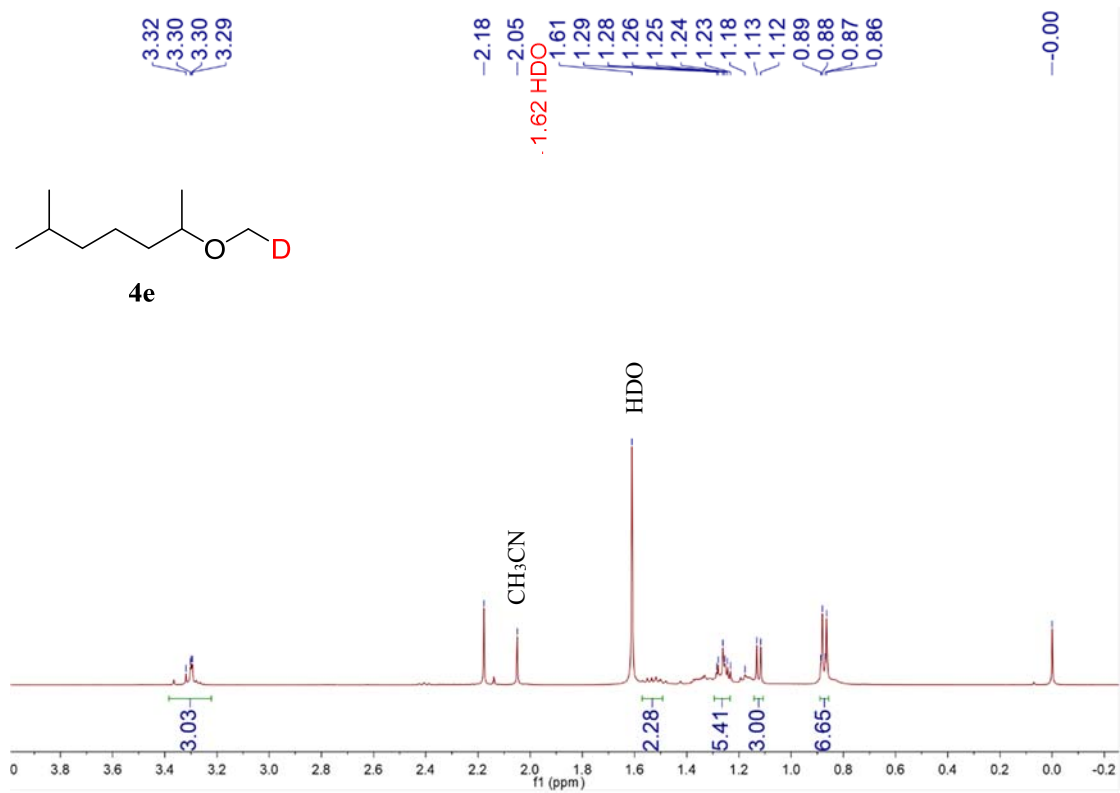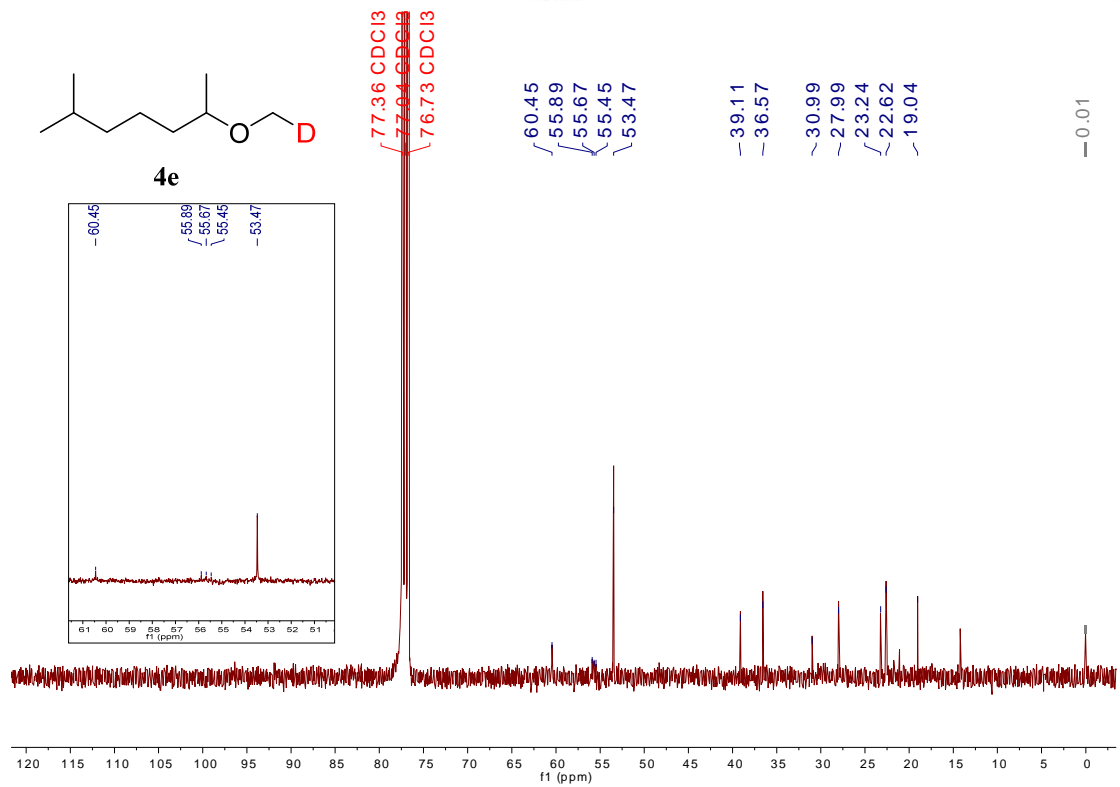

**Supplementary Fig. 71. NMR spectra of 2-(Methoxy-d)-6-methylheptane (4e).** The splitting of C-D coupling in  $^{13}\text{C}$ -NMR was shown with an enlarged view.

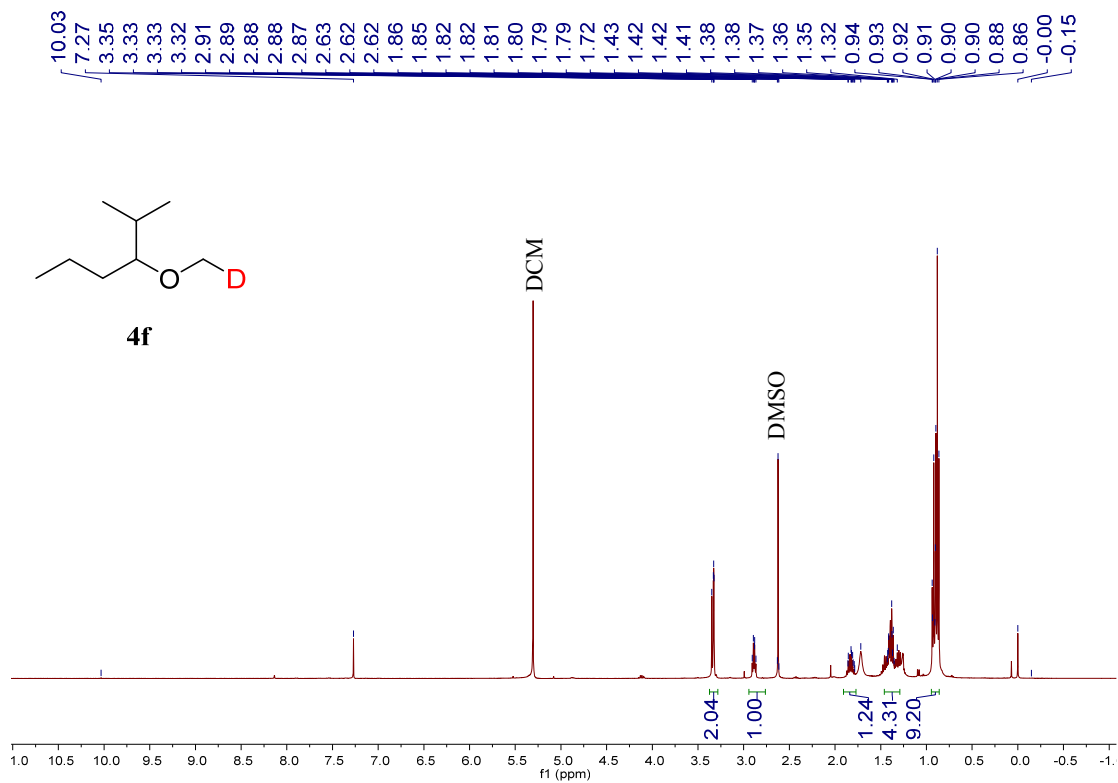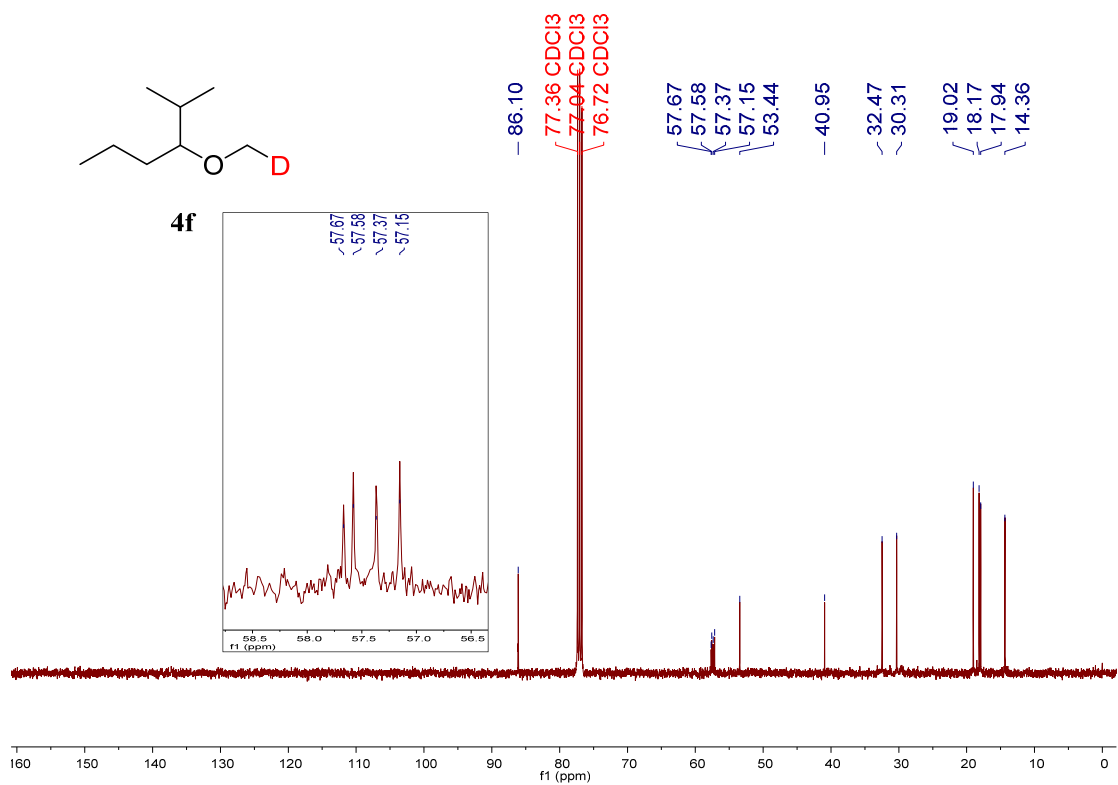

**Supplementary Fig. 72.** NMR spectra of 3-(Methoxy-d)-2-methylhexane (**4f**). The splitting of C-D coupling in <sup>13</sup>C-NMR was shown with an enlarged view.

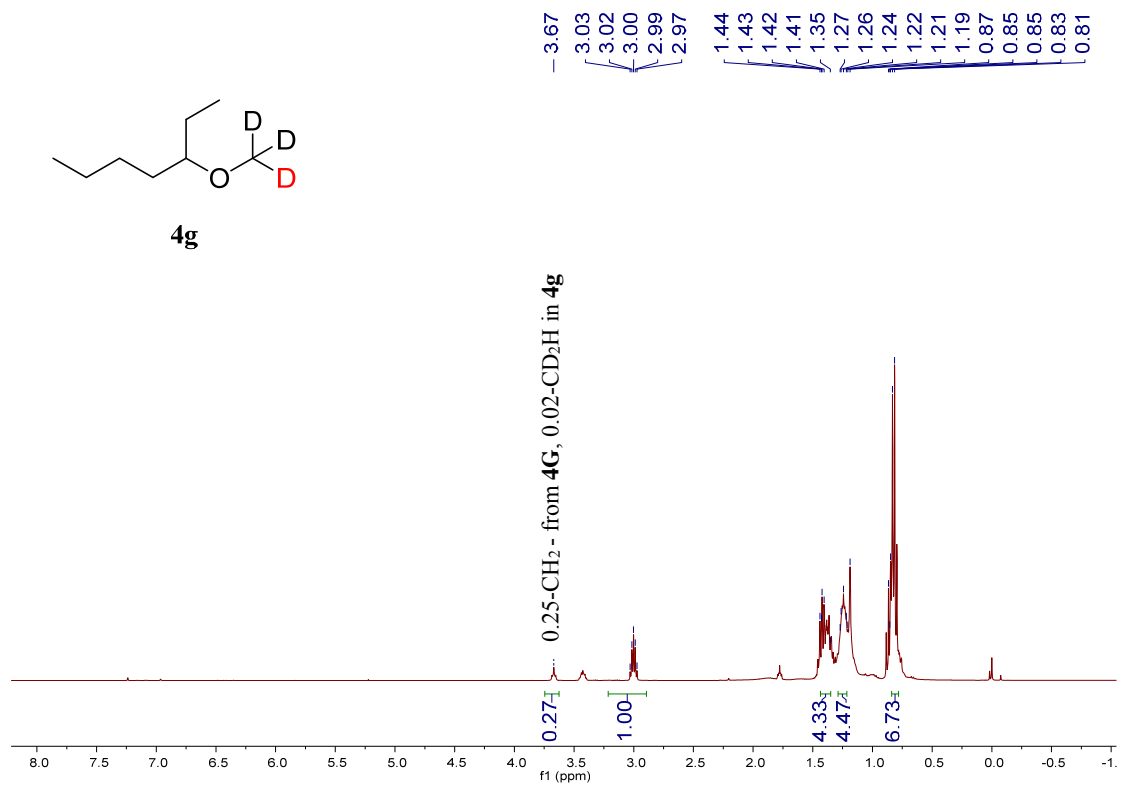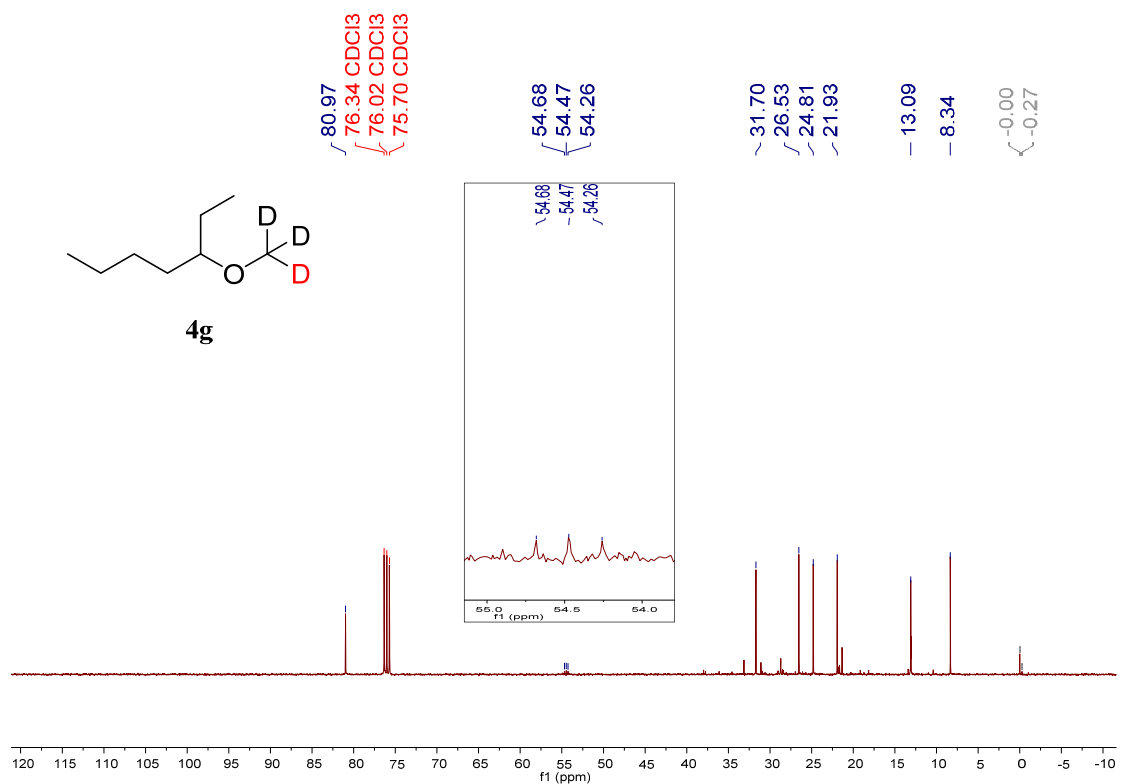

**Supplementary Fig. 73.** NMR spectra of 3-(Methoxy-d<sub>3</sub>)heptane (**4g**). The splitting of C-D coupling in <sup>13</sup>C-NMR was shown with an enlarged view.

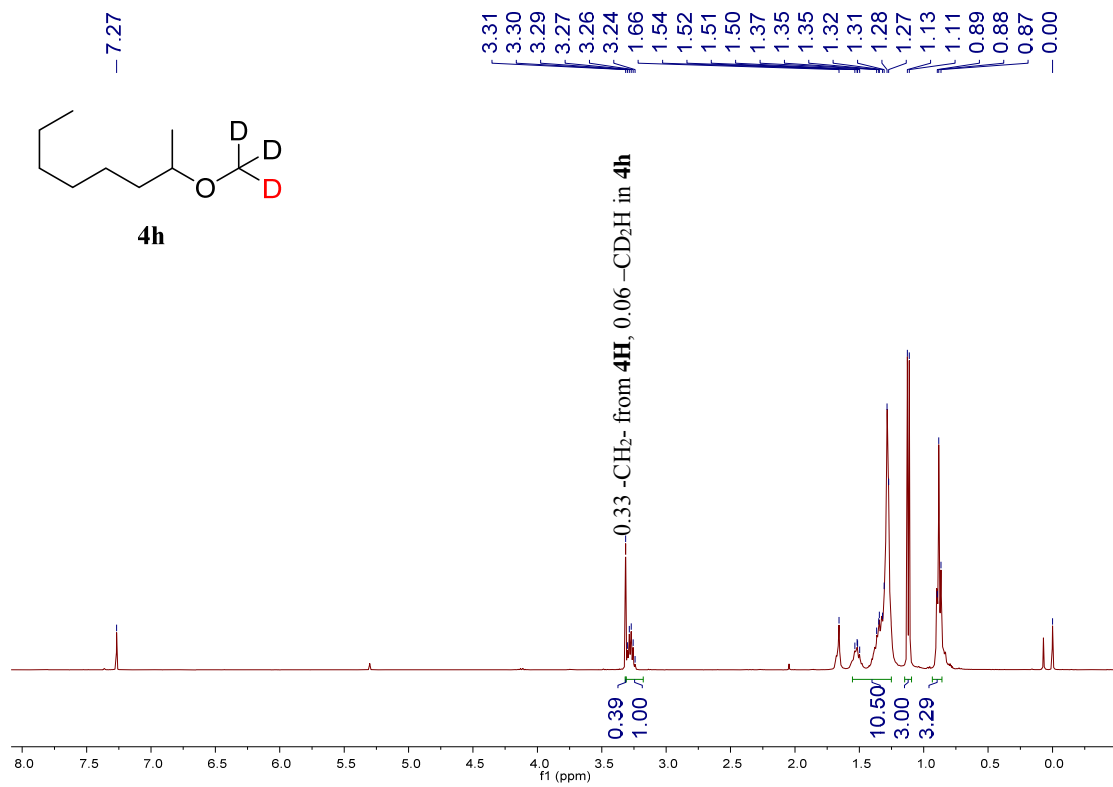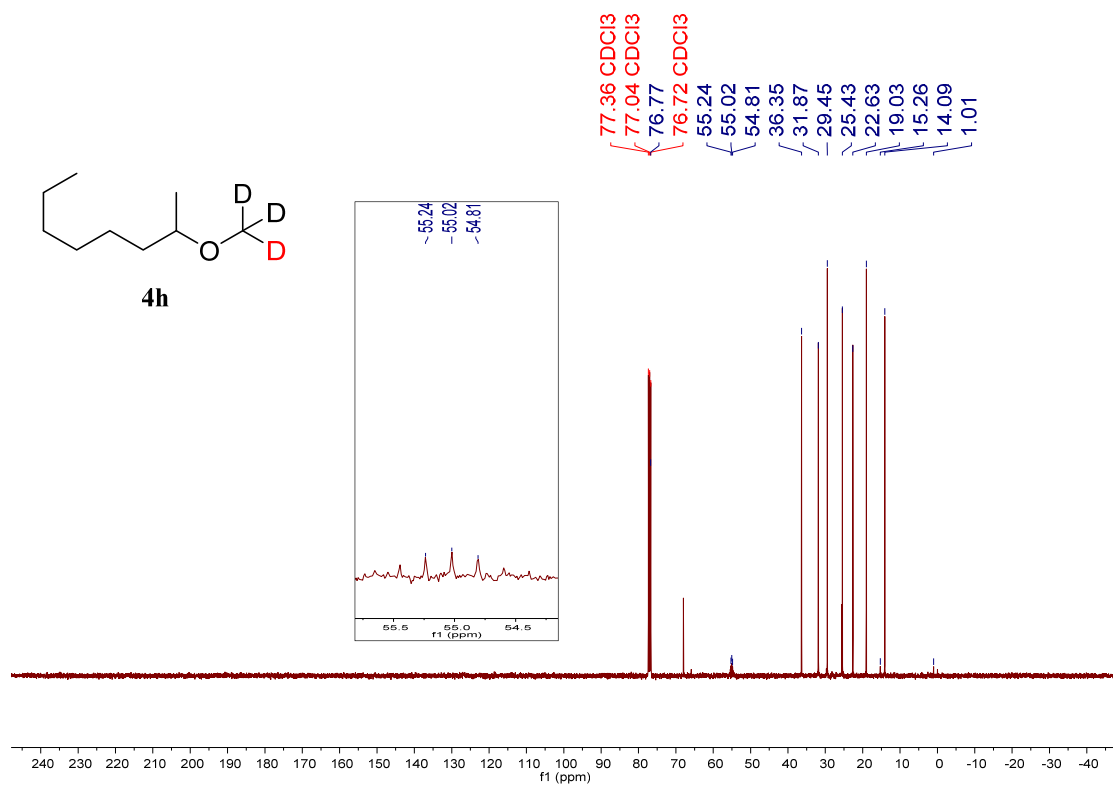

**Supplementary Fig. 74.** NMR spectra of 2-(Methoxy-d<sub>3</sub>)octane (**4h**). The splitting of C-D coupling in <sup>13</sup>C-NMR was shown with an enlarged view.

0730L2 244 (1.047)  
TOF MS EI+

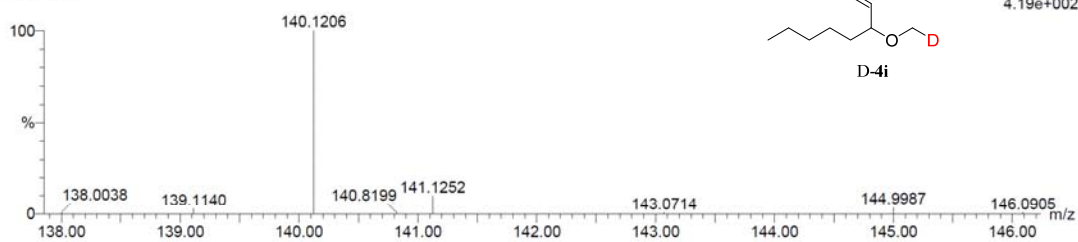

| Mass     | RA     | Calc. Mass | mDa  | PPM  | DBE | i-FIT     | Formula     |
|----------|--------|------------|------|------|-----|-----------|-------------|
| 139.1140 | 2.66   | 139.1123   | 1.7  | 12.2 | 2.5 | 229.9     | C9 H15 O    |
| 140.1206 | 100.00 | 140.1201   | 0.5  | 3.6  | 2.0 | 2773014.3 | C9 H16 O    |
| 141.1252 | 9.68   | 141.1264   | -1.2 | -8.5 | 2.0 | 5546026.5 | C9 H15 2H O |
| 144.9987 | 3.39   | ---        | ---  | ---  | --- | ---       | ---         |

0730L1 251 (1.073)  
TOF MS EI+

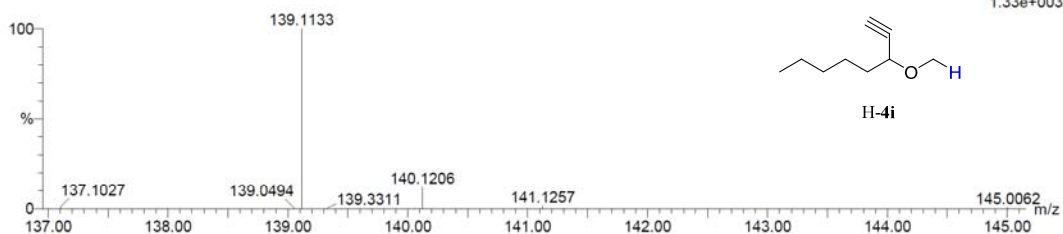

| Mass     | RA     | Calc. Mass | mDa | PPM | DBE | i-FIT     | Formula  |
|----------|--------|------------|-----|-----|-----|-----------|----------|
| 139.1133 | 100.00 | 139.1123   | 1.0 | 7.2 | 2.5 | 3.9       | C9 H15 O |
| 140.1206 | 11.78  | 140.1201   | 0.5 | 3.6 | 2.0 | 2773012.5 | C9 H16 O |

**Supplementary Fig. 75. HRMS spectra of 3-(Methoxy-d)oct-1-yne (4i) and the corresponding 3-(Methoxy)oct-1-yne without deuterium.** The D-incorporation of 4i was determined by the comparison of HRMS between the H- and D-4i.



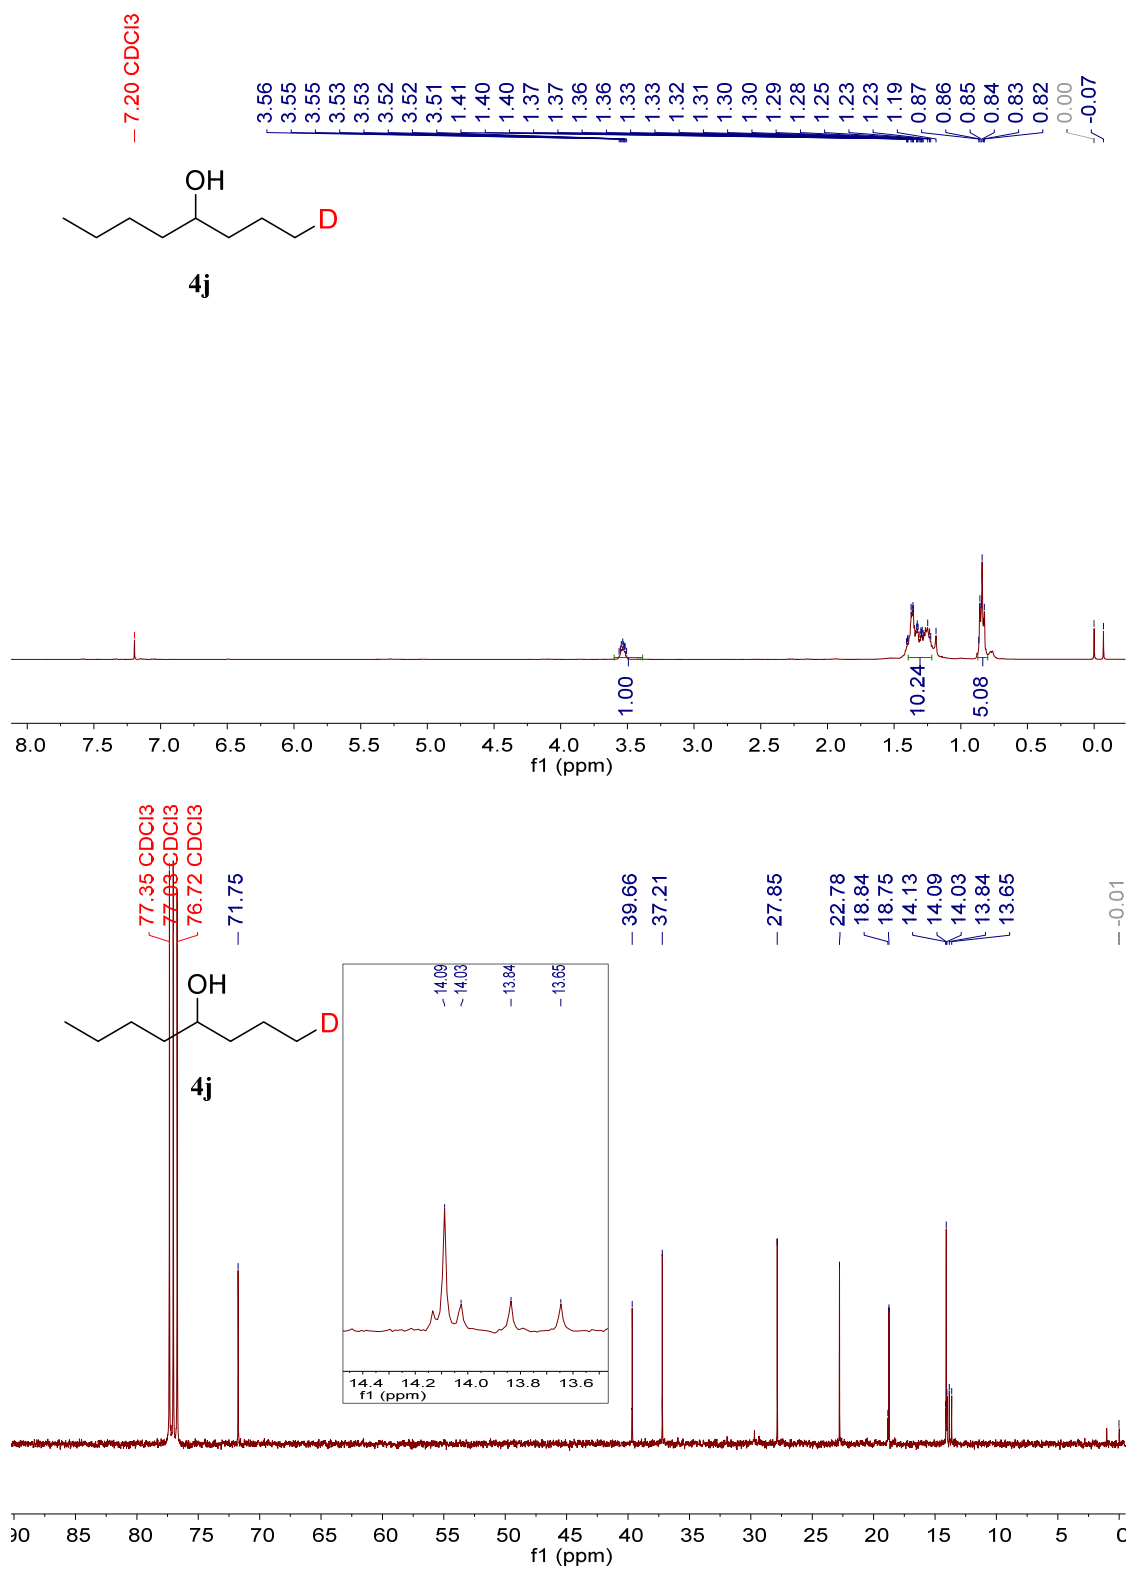

Supplementary Fig. 76. NMR spectra of Octan-8-d-4-ol (4j). The splitting of C-D coupling in <sup>13</sup>C-NMR was shown with an enlarged view.

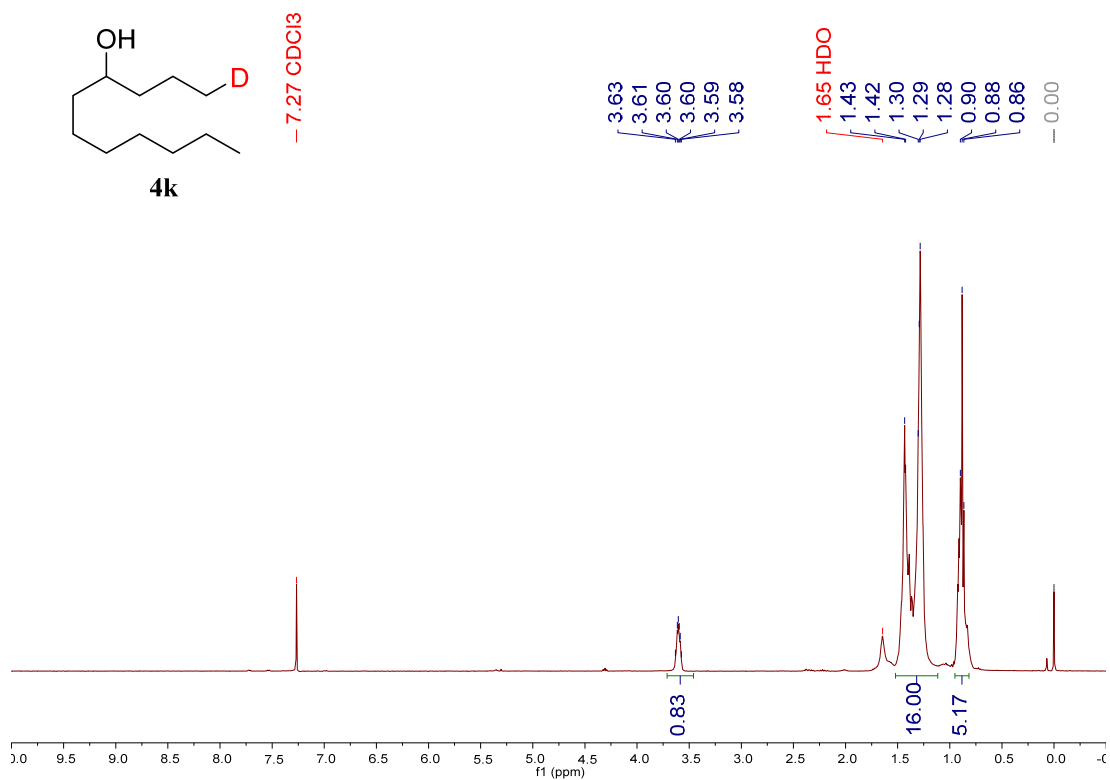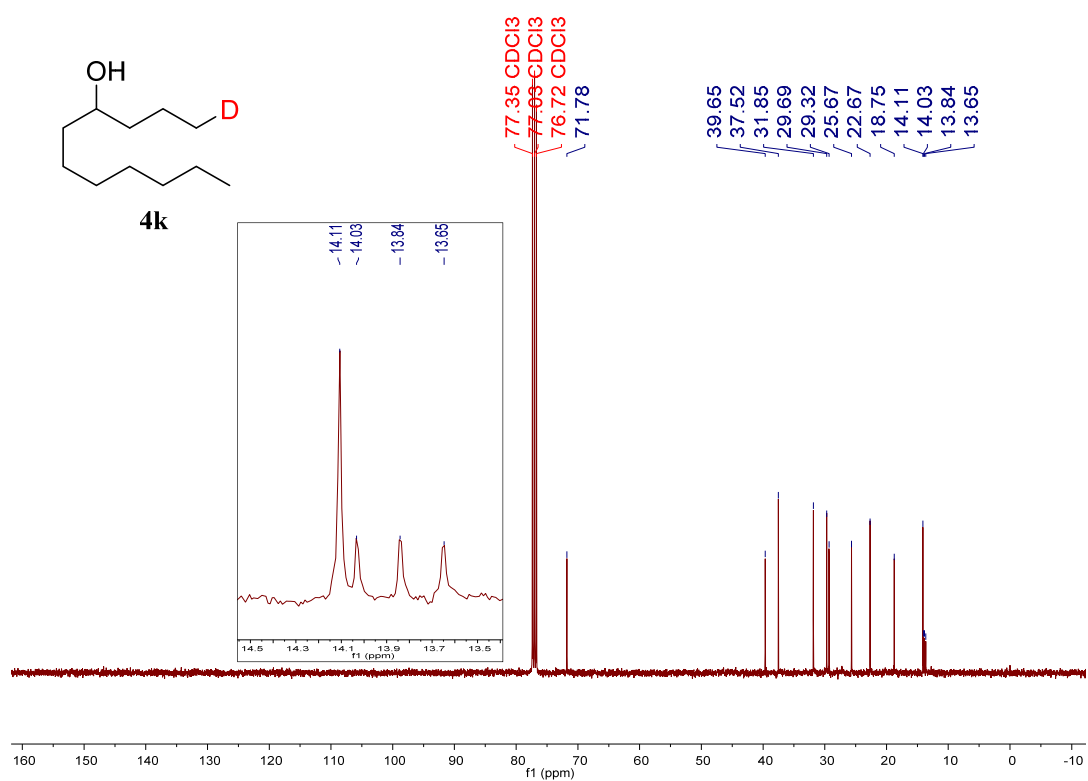

**Supplementary Fig. 77. NMR spectra of Undecan-1-d-4-ol (4k).** The splitting of C-D coupling in <sup>13</sup>C-NMR was shown with an enlarged view.

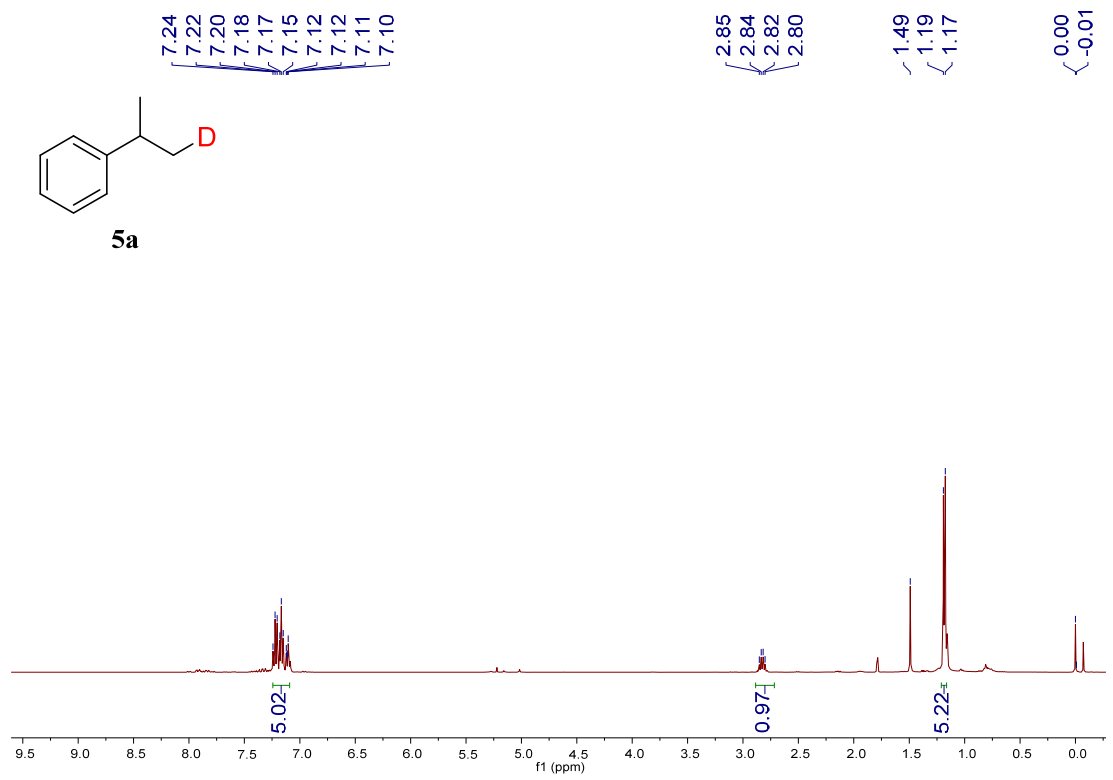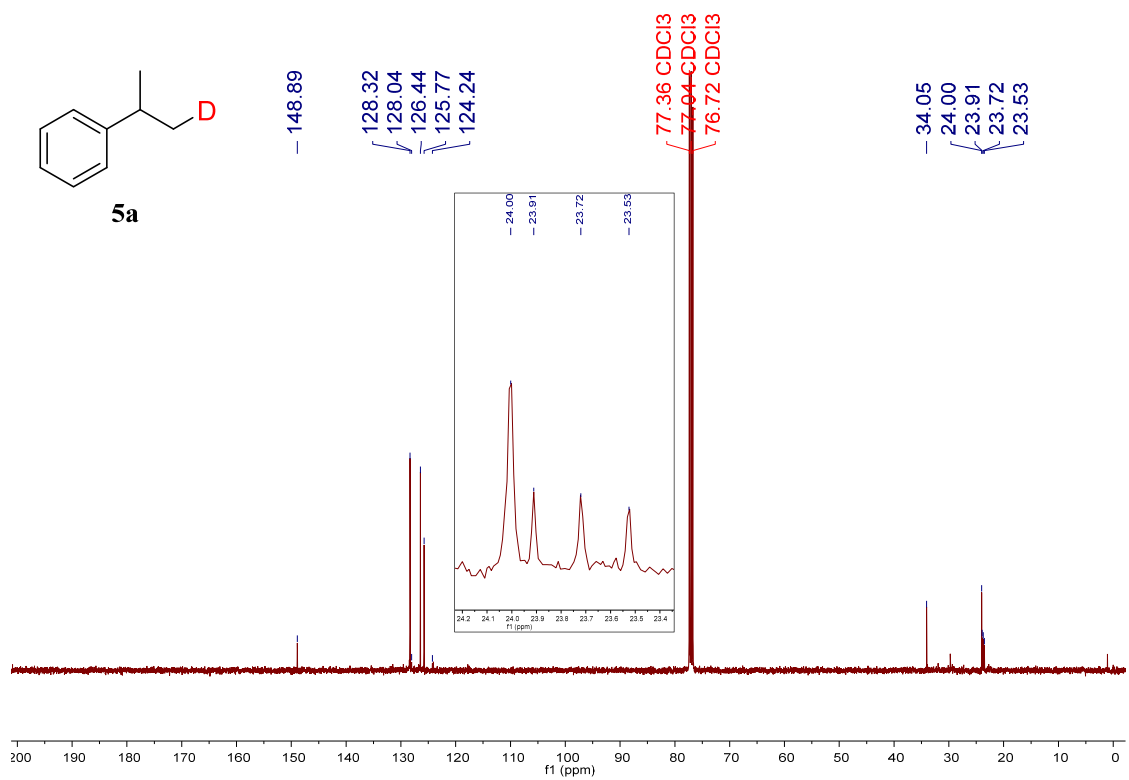

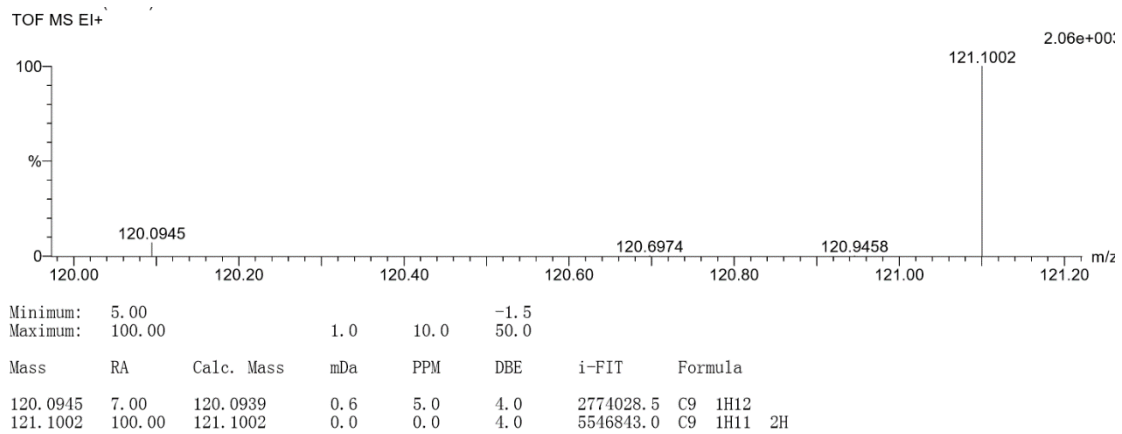

**Supplementary Fig. 78. NMR and HRMS spectra of (Propan-2-yl-1-d)benzene (5a).** The splitting of C-D coupling in  $^{13}\text{C}$ -NMR was shown with an enlarged view.

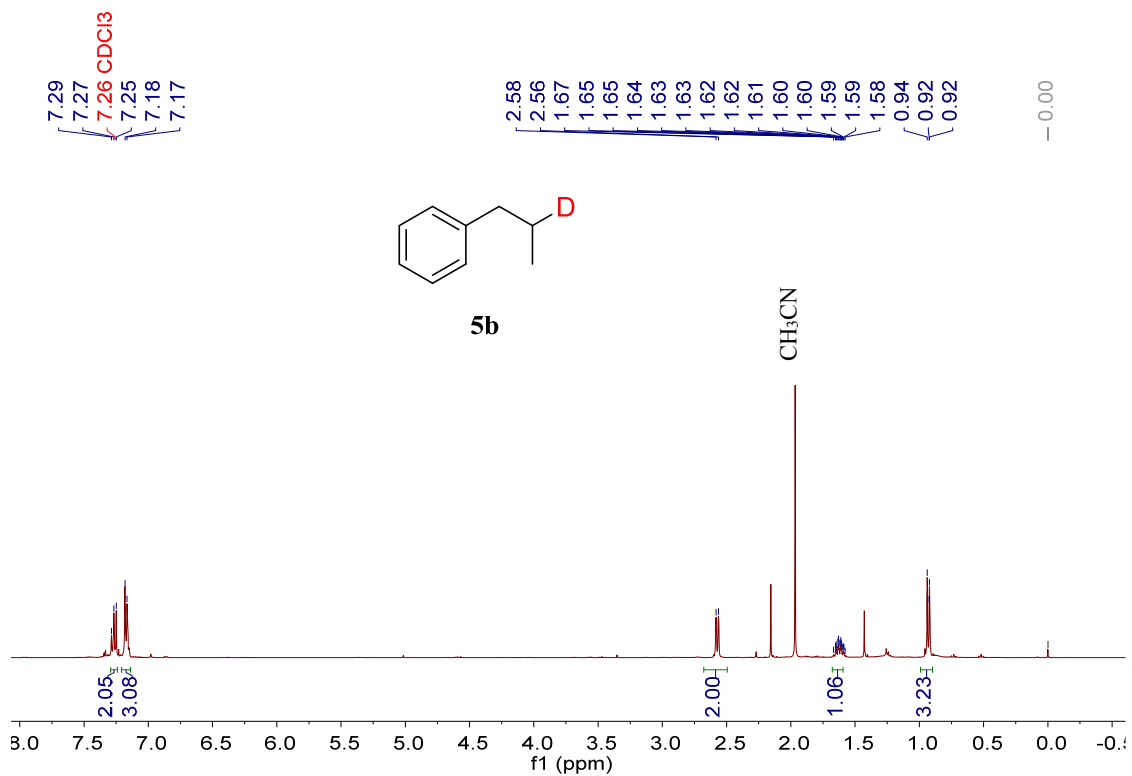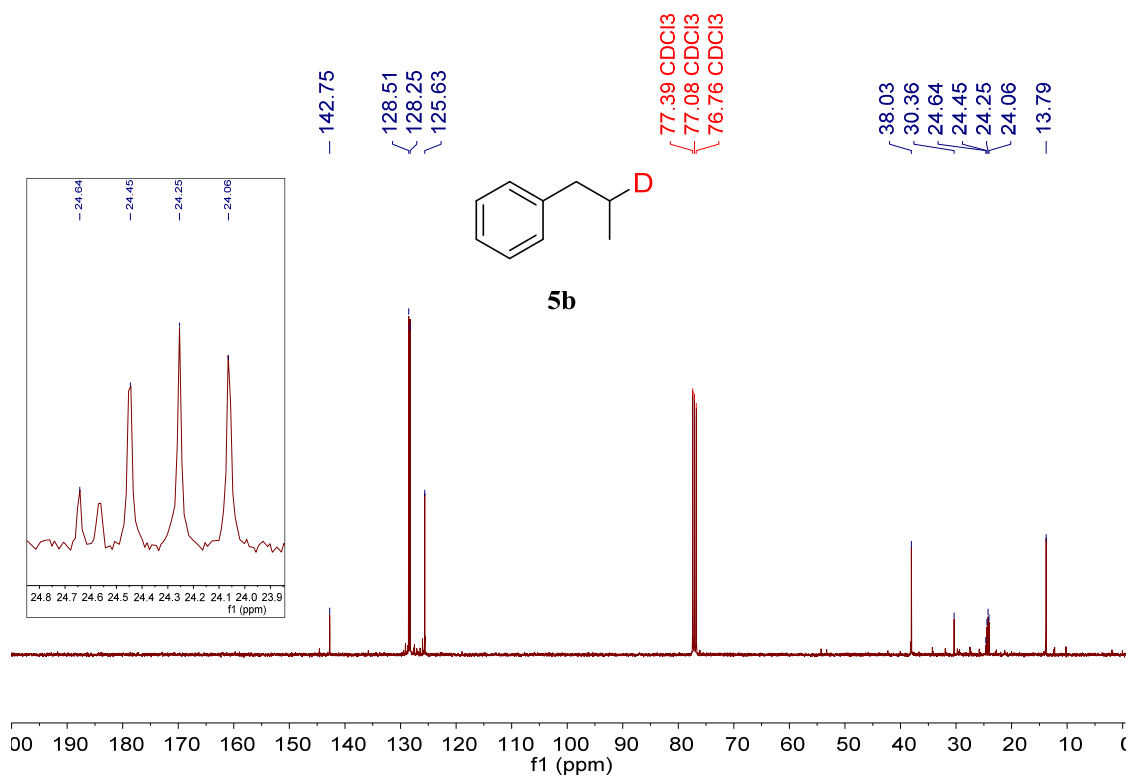

**Supplementary Fig. 79. NMR spectra of (Propyl-2-d)benzene (**5b**).** The splitting of C-D coupling in <sup>13</sup>C-NMR was shown with an enlarged view.

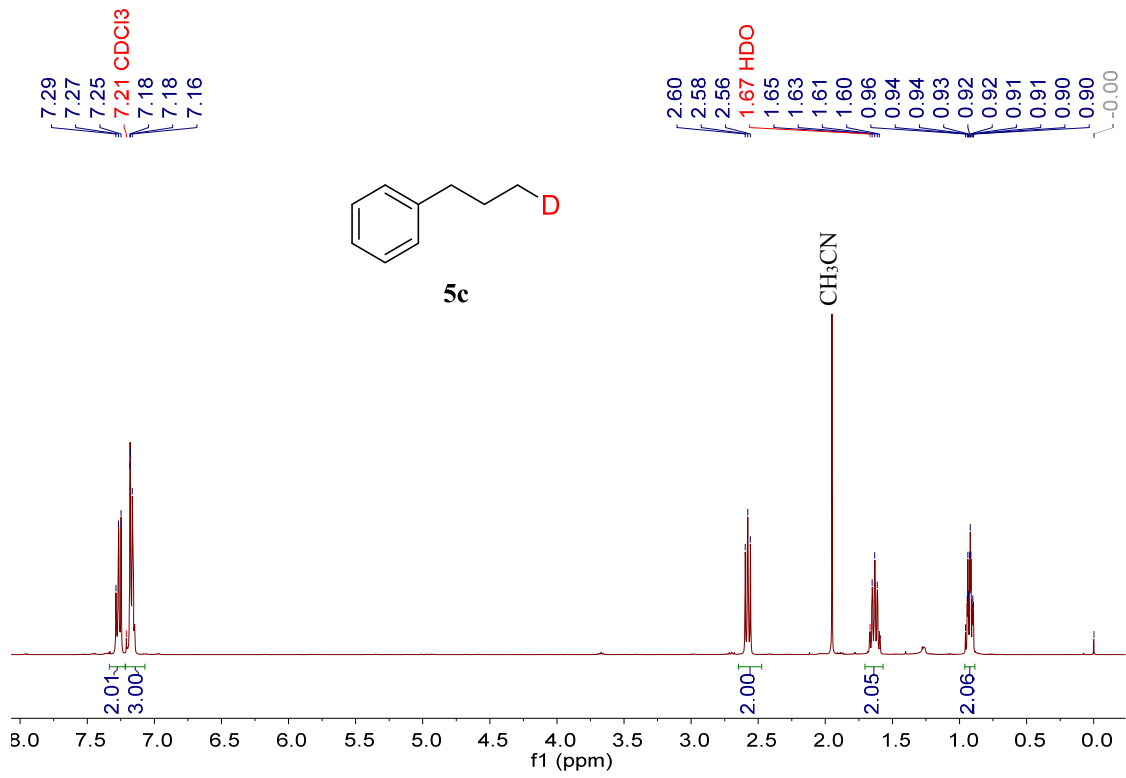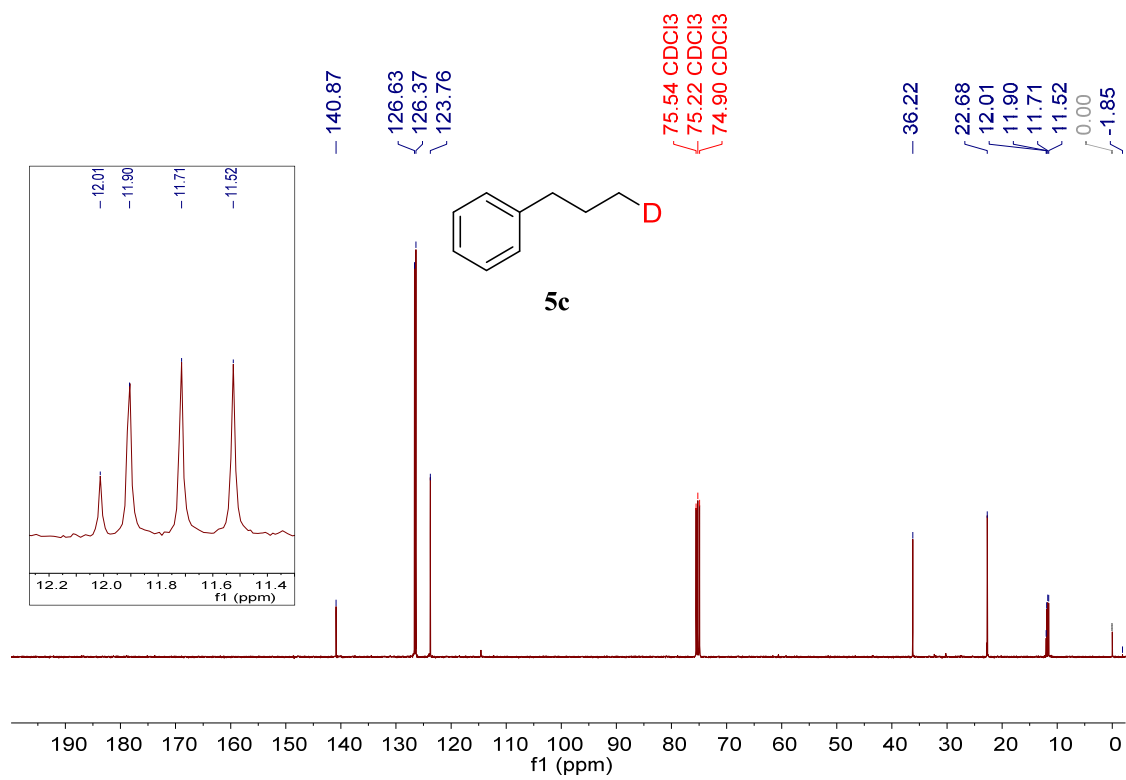

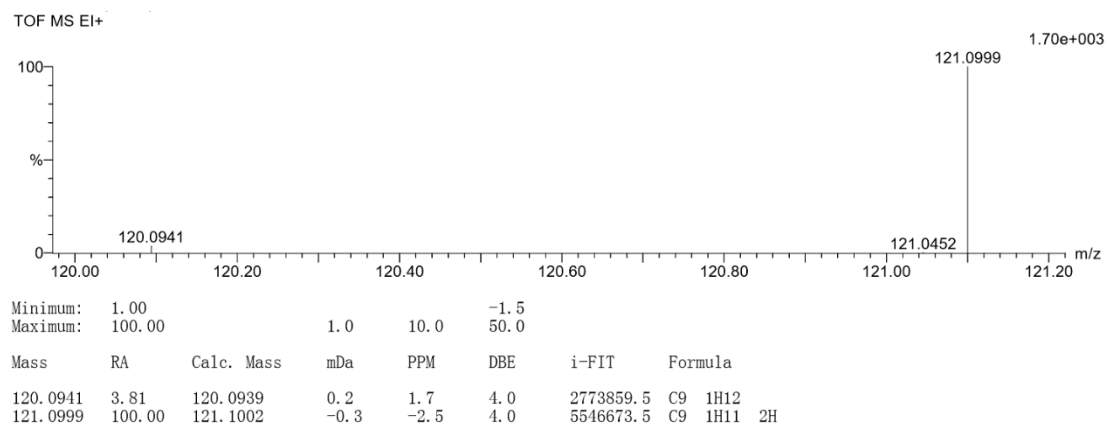

**Supplementary Fig. 80.** NMR and HRMS spectra of (Propyl-3-d)benzene (5c). The splitting of C-D coupling in  $^{13}\text{C}$ -NMR was shown with an enlarged view.

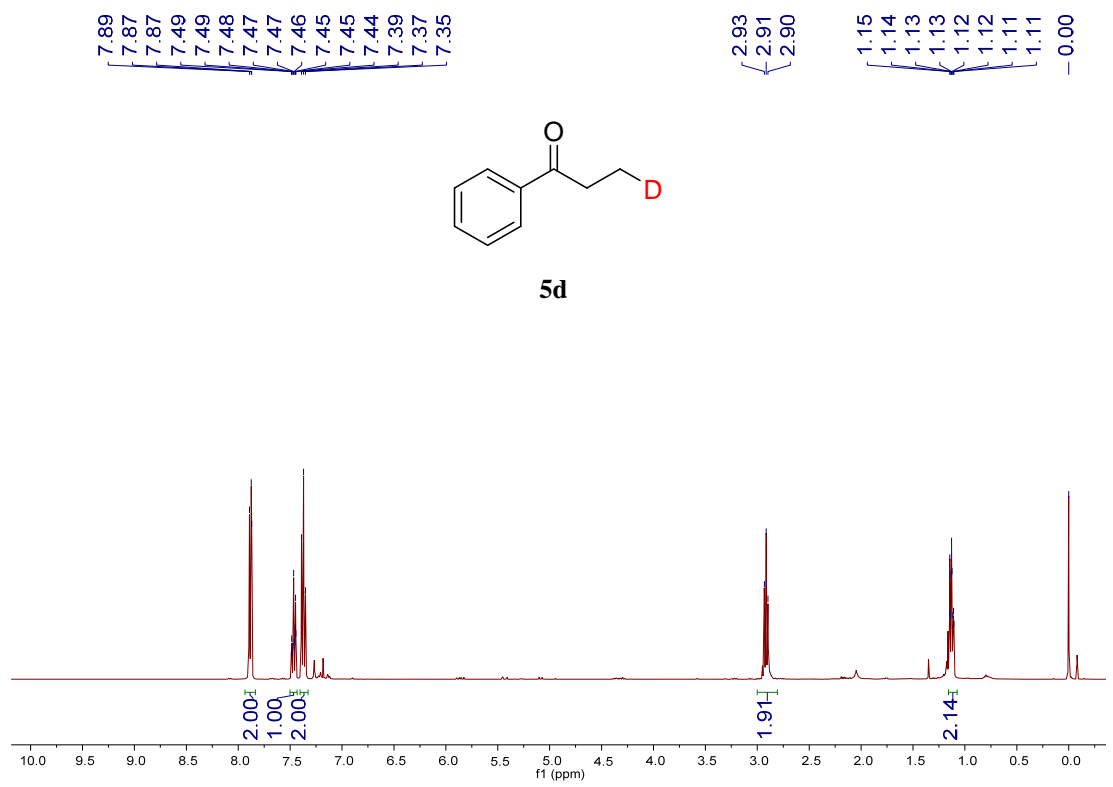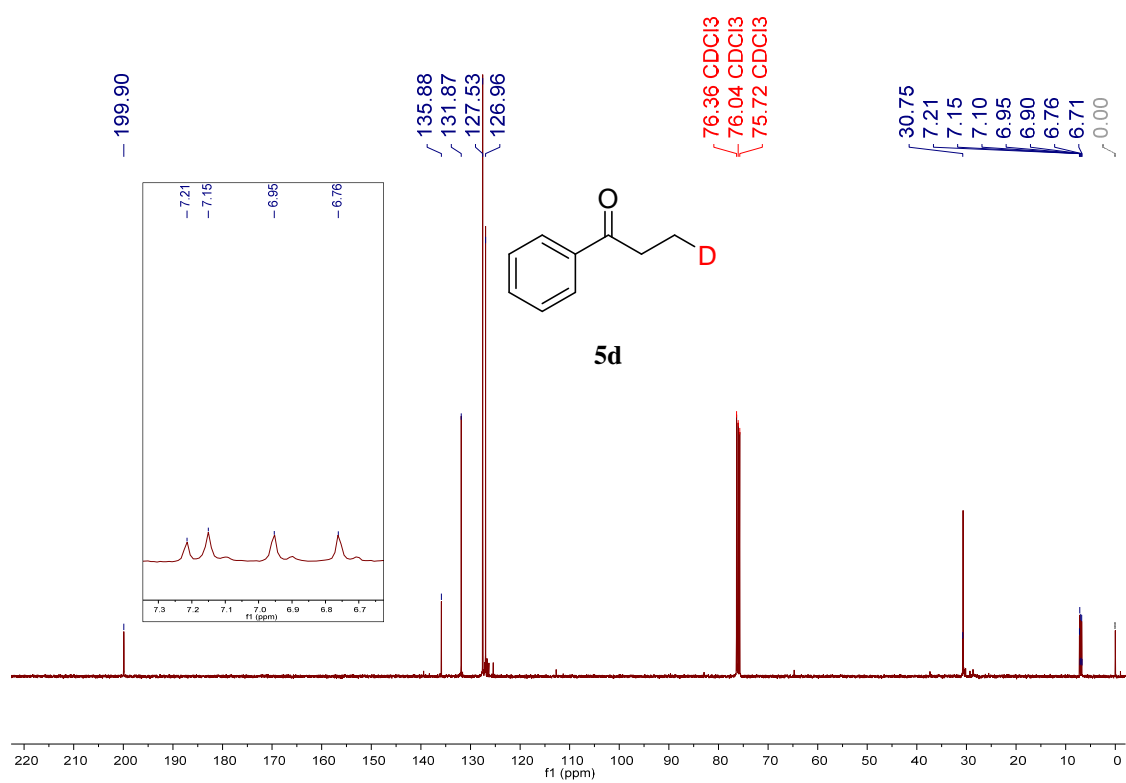

**Supplementary Fig. S1. NMR spectra of 1-Phenyl-1-propanone-3-d (**5d**). The splitting of C-D coupling in <sup>13</sup>C-NMR was shown with an enlarged view.**



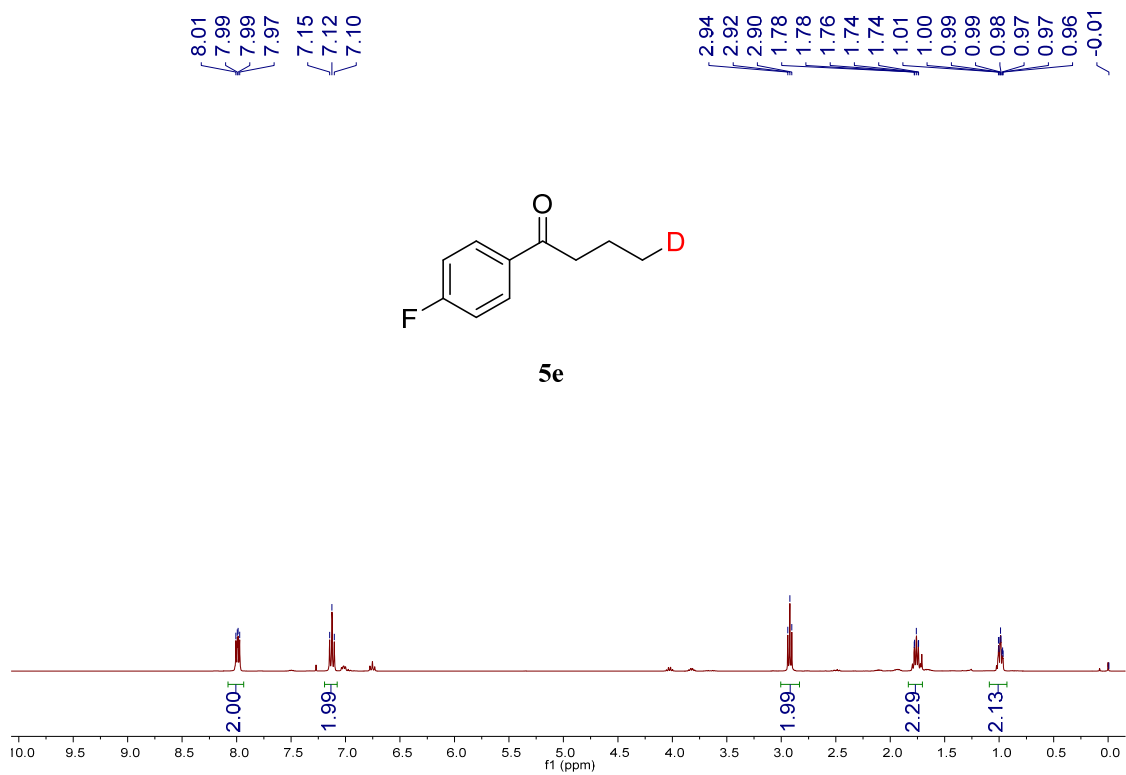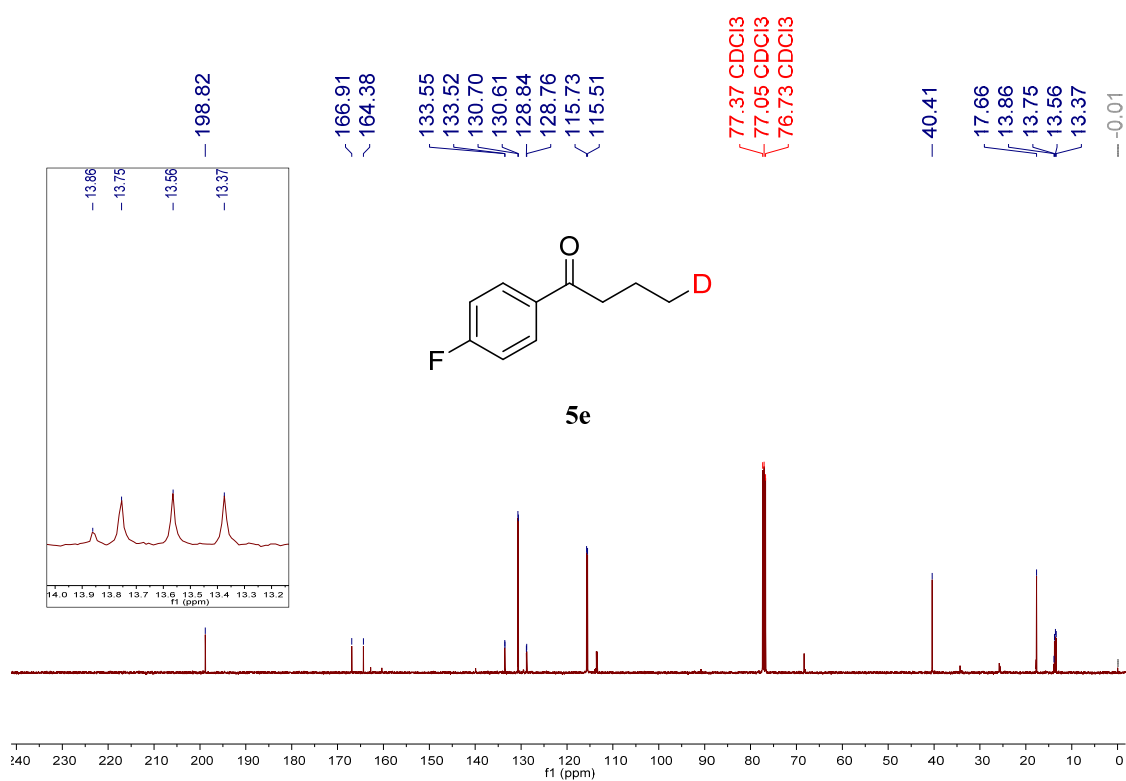

**Supplementary Fig. S2.** NMR spectra of 1-(4-Fluorophenyl)butan-1-one-4-d (**5e**). The splitting of C-D coupling in <sup>13</sup>C-NMR was shown with an enlarged view.

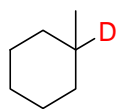

**5f**

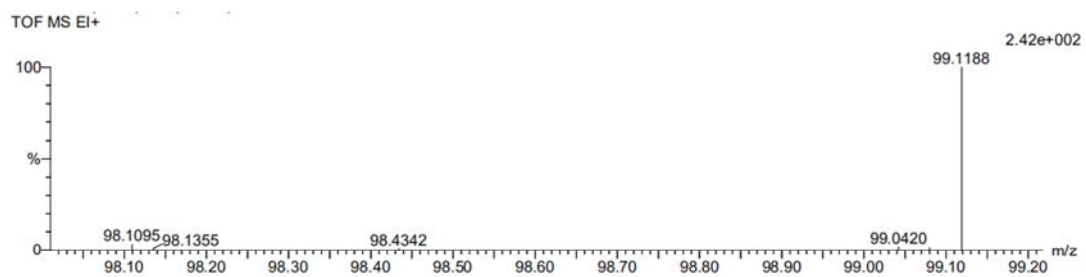

| Mass    | RA     | Calc. Mass | mDa  | PPM  | DBE | i-FIT     | Formula    |
|---------|--------|------------|------|------|-----|-----------|------------|
| 98.1095 | 2.93   | 98.1065    | 3.0  | 30.6 | 2.0 | 0.2       | C7 H10 2H2 |
|         |        | 98.1080    | 1.5  | 15.3 | 1.5 | 127.9     | C7 H12 2H  |
|         |        | 98.1096    | -0.1 | -1.0 | 1.0 | 2773135.8 | C7 H14     |
| 99.1188 | 100.00 | 99.1158    | 3.0  | 30.3 | 1.0 | 2773035.8 | C7 H13 2H  |
|         |        | 99.1174    | 1.4  | 14.1 | 0.5 | 5546091.5 | C7 H15     |

**Supplementary Fig. 83. HRMS spectrum of Methylcyclohexane-1-d (5f).**

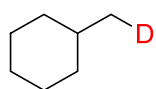

**5g**

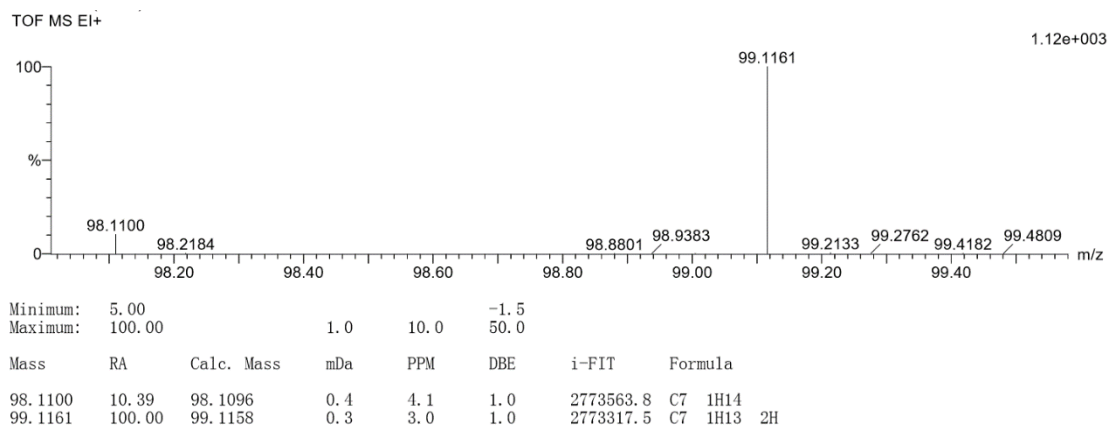

**Supplementary Fig. 84. HRMS spectrum of (Methyl-d)cyclohexane (5g).**

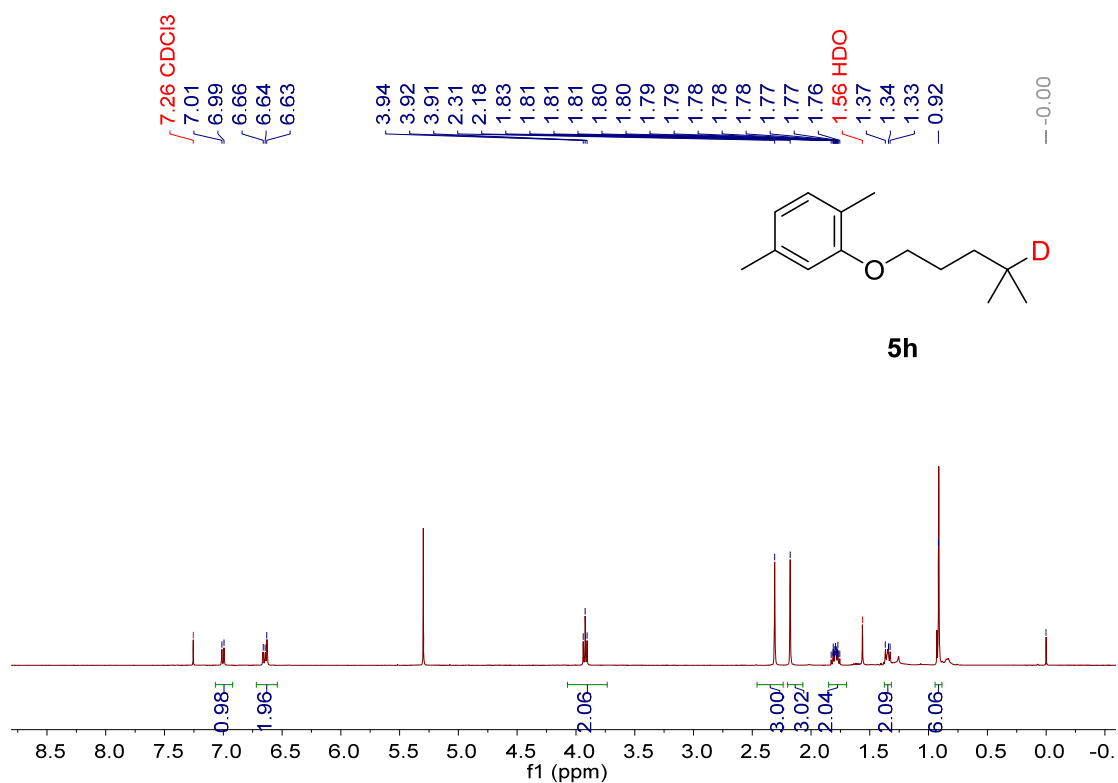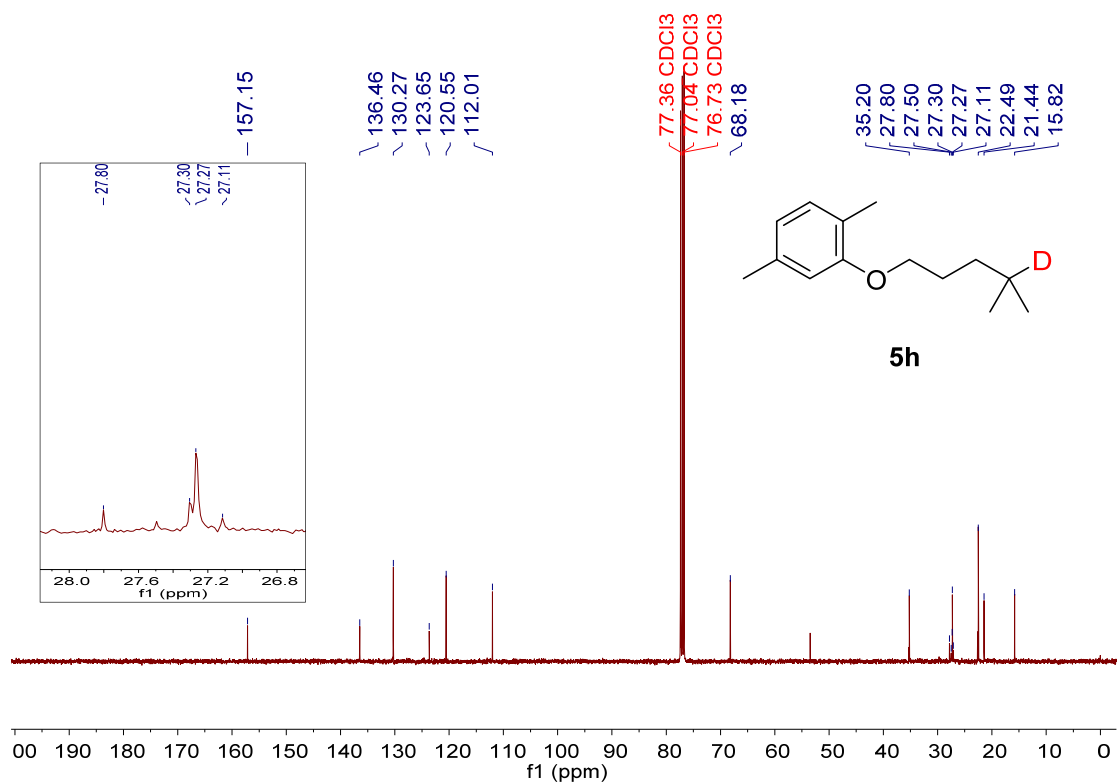

**Supplementary Fig. 85.** NMR spectra of 1,4-dimethyl-2-((4-methylpentyl-4-d)oxy)benzene (**5h**). The splitting of C-D coupling in  $^{13}\text{C}$ -NMR was shown with an enlarged view.

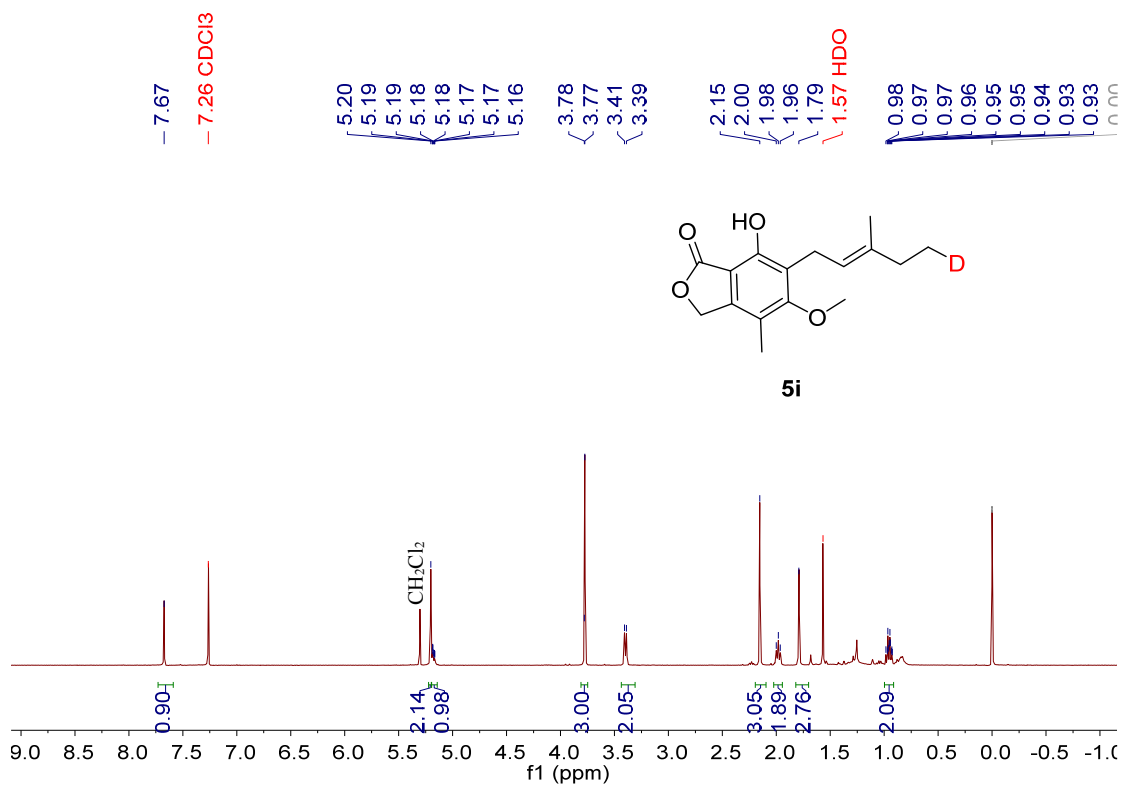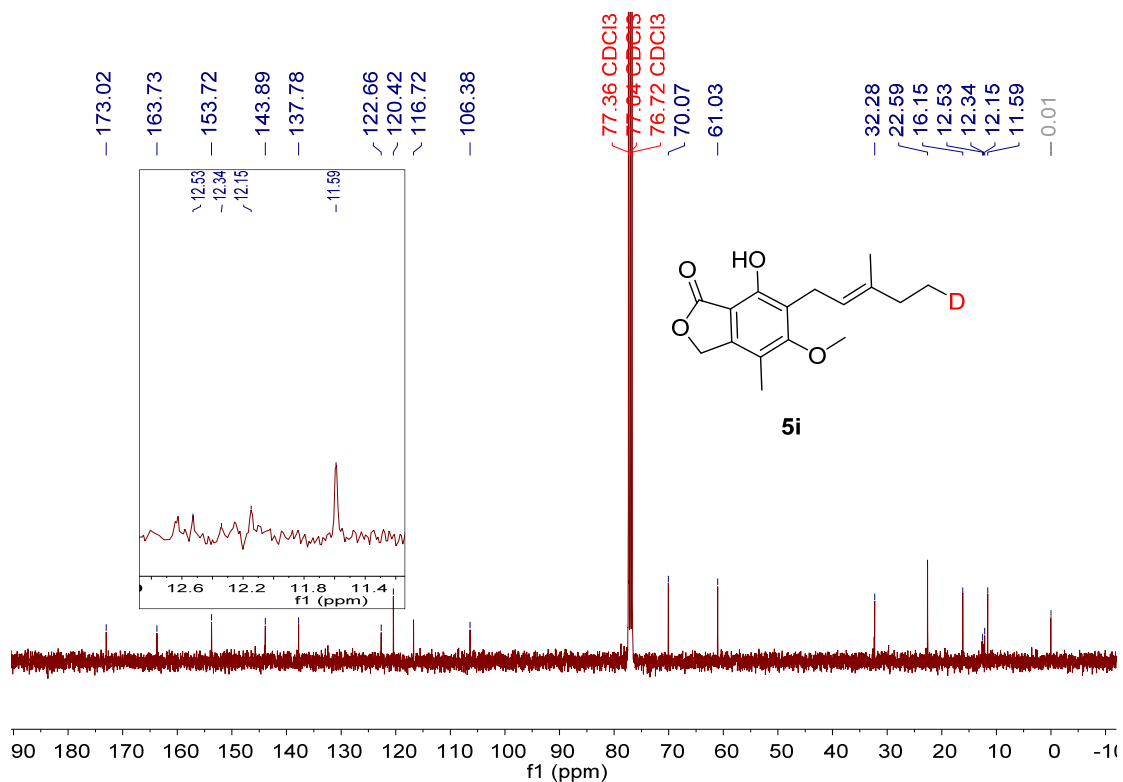

**Supplementary Fig. 86. NMR spectra of (E)-7-hydroxy-5-methoxy-4-methyl-6-(3-methylpent-2-en-1-yl)-5-d)isobenzofuran-1(3H)-one (5i). The splitting of C-D coupling in <sup>13</sup>C-NMR was shown with an enlarged view.**

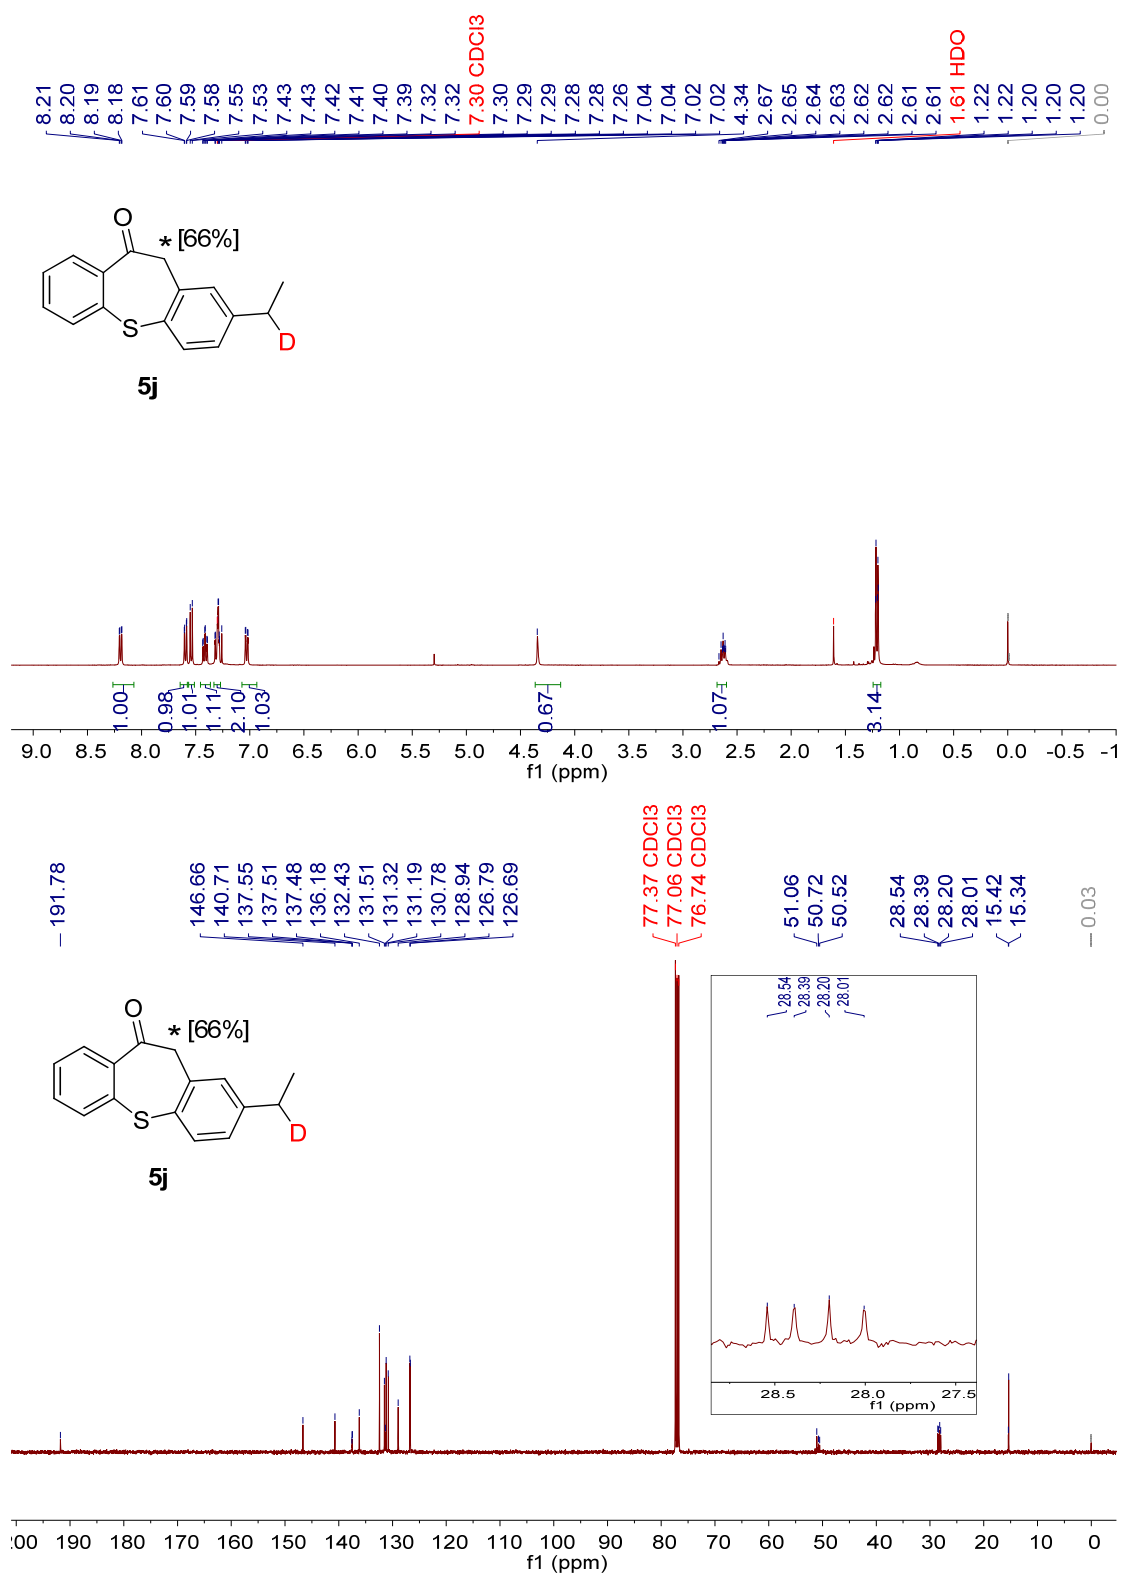

**Supplementary Fig. 87.** NMR spectra of 2-(ethyl-1-d)dibenzo[b,f]thiepin-10(11H)-one (**5j**). The splitting of C-D coupling in  $^{13}\text{C}$ -NMR was shown with an enlarged view. The signal at  $\delta$  4.34 for two protons on C11 (labeled with star) shows reduced intensity, indicating some deuteration also occurs at this position due to tautomeric exchange of the substrate with the solvent. The D-inc. on C11 of **5j** was 66% according to the signal intensity at  $\delta$  4.34.

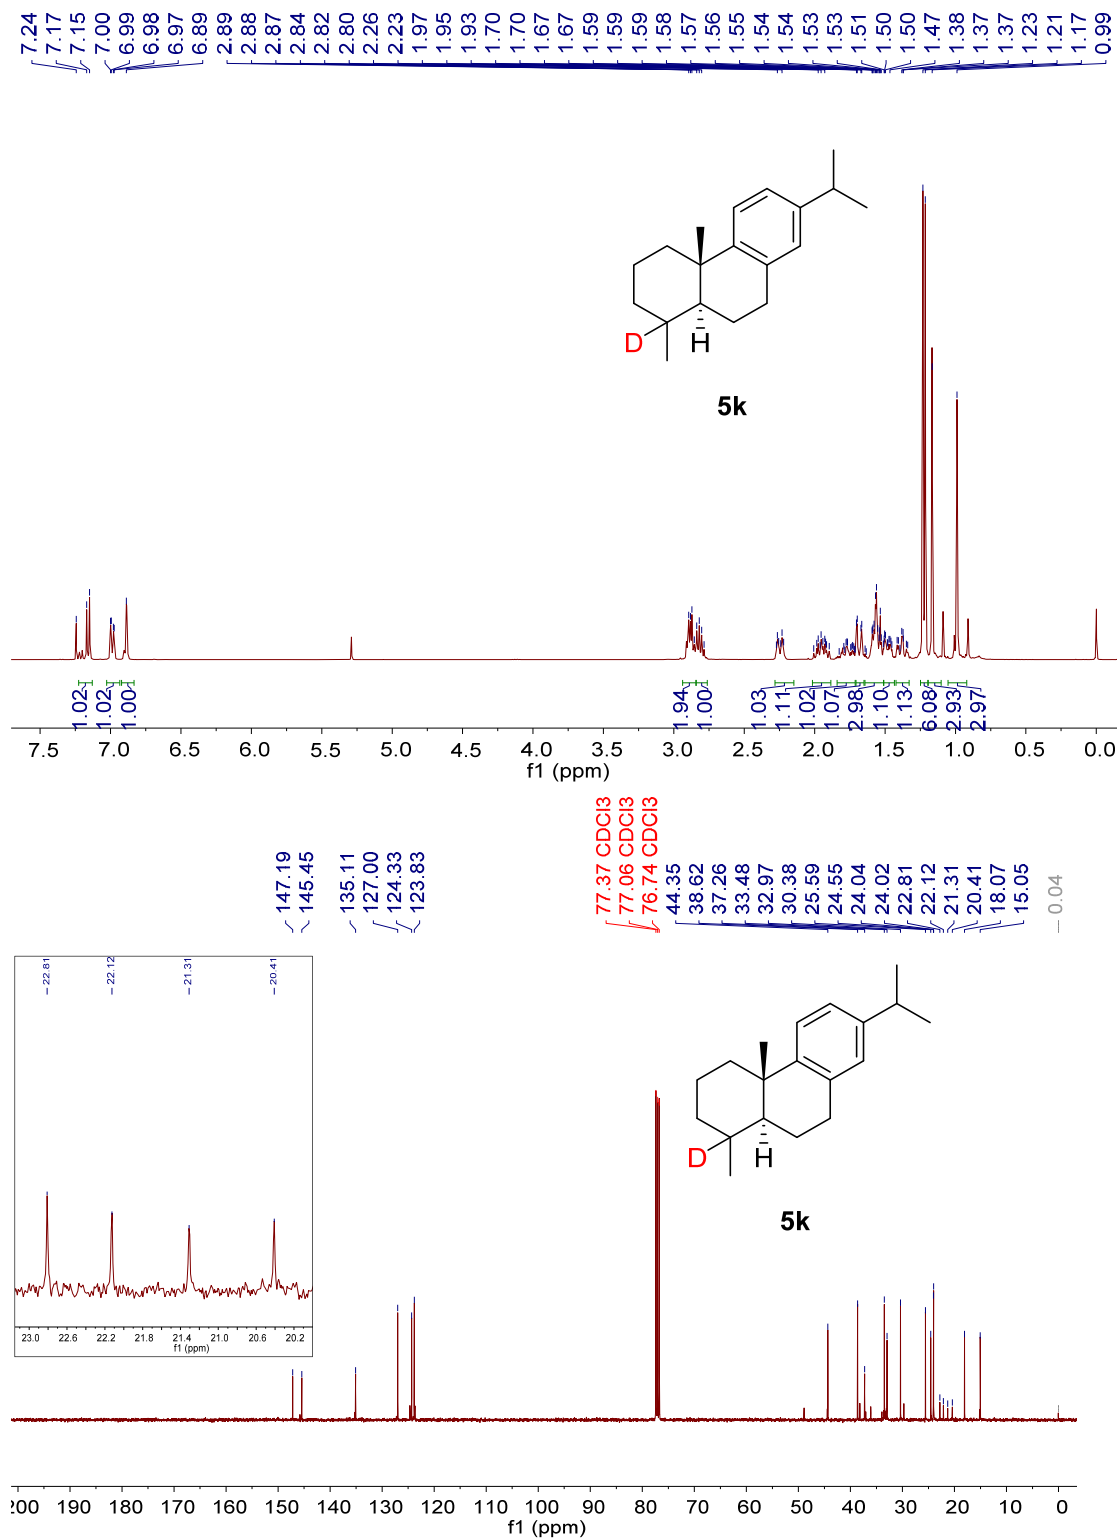

**Supplementary Fig. 88.** NMR spectra of (4a*S*,10a*S*)-7-isopropyl-1,4a-dimethyl-1,2,3,4,4a,9,10,10a-octahydrophenanthrene-1-d (**5k**). The splitting of C-D coupling in <sup>13</sup>C-NMR was shown with an enlarged view.

## Supplementary Tables

**Supplementary Table 1** List of primers.

| Mutant                | Sequence                           |
|-----------------------|------------------------------------|
| A128L                 | GTAAAAATTCCGCTGGCAATTACCCG         |
| A128F                 | GTAAAAATTCCGTTTGCAATTACCCG         |
| A171L                 | TAGCAGCGCAACCAATCTGACCCTGTATCATCG  |
| A171F                 | TAGCAGCG CAACCAATTTTACCCTGTATCATCG |
| T172A                 | GCAACCAATGCAGCGCTGTATCATCG         |
| T172L                 | GCAACCAATGCACIGCTGTATCATCG         |
| T172F                 | GCAACCAATGCATTICTGTATCATCG         |
| I398A                 | AAATATGATGGTGCCGCCATCAGCGATCAC     |
| I398L                 | AAATATGATGGTCTGGGCCATCAGCGATCAC    |
| I398F                 | AAATATGATGGTTTTGGCCATCAGCGATCAC    |
| I398R                 | AAATATGATGGTCCGCCGCCATCAGCGATCAC   |
| A399L                 | TATGATGGTATTCTGATCAGCGATCACATT     |
| A399F                 | TATGATGGTATTTTATCAGCGATCACATT      |
| G431A                 | CTGACCAGTACCGCGTGTGATCGTGG         |
| G431L                 | CTGACCAGTACCCTGTGTGATCGTGG         |
| G431F                 | CTGACCAGTACCTTTTGTGATCGTG          |
| G462A                 | CTGGATCCGGATGCGGTTAGCACCTATG       |
| G462L                 | CTGGATCCGGATCTGGTTAGCACCTATG       |
| G462F                 | CTGGATCCGGATTTTGTAGCACCTATG        |
| Y466A                 | GATGGTGTTAGCACCGCGTTCGTTTTGCAAAA   |
| Y466L                 | GATGGTGTTAGCACCTGGTTCGTTTTGCAAAA   |
| Y466F                 | GATGGTGTTAGCACCTTTGTTTCGTTTTGCAAAA |
| Q486A                 | GTATTACCATGGCGCTGATTGCATG          |
| Q486L                 | GTATTACCATGCTGCTGATTGCATG          |
| Q486F                 | GTATTACCATGTTICTGATTGCATG          |
| silent reverse primer | GATGCCGGGAGCAGACAAGCCCGTCAGGGCGC   |



**Supplementary Table 2** The ratio of M-1 peak to M peak in HRMS of various hydrocarbons with low boiling points.

| Substrate | HRMS result            |                          |
|-----------|------------------------|--------------------------|
|           | Ratio <sub>M</sub> (%) | Ratio <sub>M-1</sub> (%) |
| Ethane    | 100                    | 66                       |
| Propane   | 100                    | 80                       |
| Pentane   | 100                    | 12                       |
| Hexane    | 100                    | 2                        |
| Heptane   | 100                    | <1                       |
| Octane    | 100                    | <1                       |
| Decane    | 100                    | <1                       |
| Undecane  | 100                    | <1                       |

**Supplementary Table 3** Evaluation of the difference of D-incorporation determined by NMR and HRMS.

| Substrate | D-incorporation (%) |                   |
|-----------|---------------------|-------------------|
|           | Determined by HRMS  | Determined by NMR |
| <b>1a</b> | 91±1                | 93±2              |
| <b>1b</b> | 94±2                | 95±2              |
| <b>1c</b> | 95±1                | 96±1              |

Data are presented as mean value ± SD (standard deviations) of three replicates.

**Supplementary Table 4** Protein sequence of CvFAP.

---

| Protein sequence of CvFAP |            |             |            |             |            |
|---------------------------|------------|-------------|------------|-------------|------------|
| MGSSHHHHH                 | SSGLVPRGSH | MASMTGGQQM  | GRGSEFMASI | TSRASARASC  | SQANTRAGRV |
| ALSGGALLRP                | ARPARSFVPA | RKQQQGAVRR  | GGALSARASA | VEDIRKVLSD  | SSSPVAGQKY |
| DYILVGGGTA                | ACVLANRLSA | DGSKRVLVLE  | AGPDNTRSDV | KIPAAITRLF  | RSPLDWNLFS |
| ELQEQLAERQ                | IYMARGRLLG | GSSATNATLY  | HRGAAGDYDA | WGVEGWSSSED | VLSWVQAET  |
| NADFGPGAYH                | GSGGPMRVEN | PRYTNKQLHT  | AFFKAAEEVG | LTPNSDFNDW  | SHDHAGYGTF |
| QVMQDKGTRA                | DMYRQYLKPV | LGRRLNLQVLT | GAAVTKVNID | QAAGKAQALG  | VEFSTDGPTG |
| ERLSAELAPG                | GEVIMCAGAV | HTPFLKHS    | VGPSAELKEF | GIPVVSNLG   | VGQNLQDQPA |
| CLTAAPVKEK                | YDGLAISDHI | YNEKGQIRKR  | AIASYLLGGR | GGLTSTGCDR  | GAFVRTAGQA |
| LPDLQVRFVP                | GMALDPDGVS | TYVRFKQFQS  | QGLKWPSGIT | MQLIACRPQS  | TGSVGLKSAD |
| PFAPPKLSPG                | YLTDKDGADL | ATLRKGIHWA  | RDVARSSALS | EYLDGELFPG  | SGVVSDDQID |
| EYIRRSIHSS                | NAITGTCKMG | NAGDSSSVVD  | NQLRVHGVEG | LRVVDASVVP  | KIPGGQTGAP |
| VVMIAERAAA                | LLTGKATIGA | SAAAPATVAA  |            |             |            |

---

**Supplementary Table 5** DNA sequence of CvFAP.

---

| <b>DNA sequence of CvFAP</b> |                                                                    |
|------------------------------|--------------------------------------------------------------------|
| 1                            | ATGGGCAGCA GCCATCATCA TCATCATCAC AGCAGCGGCC TGGTGCCGCG CGGCAGCCAT  |
| 61                           | ATGGCTAGCA TGA CTGGTGG ACAGCAAATG GGTCGCGGAT CCGAATTCAT GGCAAGCATT |
| 121                          | ACCAGCCGTG CAAGCGCACG TGCAAGCTGT AGCCAGGCAA ATACCCGTGC AGGTCGTGTT  |
| 181                          | GCACTGAGCG GTGGTGC ACT GCTGCGTCCG GCACGTCTG CACGTAGCTT TGTTCCGGCA  |
| 241                          | CGTAAACAGC AGCAGGGTGC AGTTCGTCGT GGTGGTGCCC TGAGCGCACG TGCCAGCGCA  |
| 301                          | GTTGAAGATA TTCGTAAAGT TCTGAGCGAT AGCAGCAGTC CGGTTGCAGG TCAGAAATAT  |
| 361                          | GATTATATTC TGGTTGGTGG TGGCACC GCA GCATGTGTTT TGGCAAATCG TCTGAGCGCA |
| 421                          | GATGGTAGCA AACGTGTTCT GGTTCTGGAA GCAGGTCCGG ATAATACCAG CCGTGATGTT  |
| 481                          | AAAATTCCGG CAGCAATTAC CCGTCTGTTT CGTAGTCCGC TGGATTGGAA CCTGTTTACG  |
| 541                          | GAAGTCAAAG AACAGCTGGC AGAACGTCAG ATTTATATGG CACGTGGTCG TCTGCTGGGT  |
| 601                          | GGTAGCAGCG CAACCAATGC AACCTGTAT CATCGTGGTG CAGCCGGTGA TTATGATGCA   |
| 661                          | TGGGGTGTG AAGTTGGAG CAGCGAAGAT GTTCTGAGCT GGTTTGTTC AAGCAGAAACC    |
| 721                          | AATGCAGATT TTGGTCCGGG TGCATATCAT GGTAGCGGTG GTCCGATGCG TGTTGAAAAT  |
| 781                          | CCGCGTTATA CCAATAAACA GCTGCATACC GCATTTTCA AAGCAGCAGA AGAAGTTGGT   |
| 841                          | CTGACCCCGA ATAGCGATTT TAATGATTGG AGCCATGATC ATGCAGGTTA TGGCACCTTT  |
| 901                          | CAGGTTATGC AGGATAAAGG CACCCGTGCA GATATGTATC GTCAGTATCT GAAACCGGTT  |
| 961                          | CTGGGTCGTC GTAATCTGCA GGTTCTGACC GGTGCAGCAG TTACCAAAGT TAATATTGAT  |
| 1021                         | CAGGCAGCAG GTAAAGCACA GGCAC TGGGT GTTGAATTTT CAACCGATGG TCCGACCGGT |
| 1081                         | GAACGTCTGA GTGCAGA ACT GGCACCGGGT GGTGAAGTTA TTATGTGTGC CGGTGCAGTT |
| 1141                         | CATACCCCGT TTCTGCTGAA ACATAGCGGT GTTGGTCCGA GCGCAGAACT GAAAGAATTT  |
| 1201                         | GGTATTCCGG TTGTTAGCAA TCTGGCAGGC GTTGGTCAGA ATCTGCAGGA TCAGCCTGCA  |
| 1261                         | TGTCTGACCG CAGCACCGGT TAAAGAAAAA TATGATGGTA TTGCCATCAG CGATCACATT  |
| 1321                         | TATAACGAAA AAGGTCAGAT TCGCAAACGT GCAATTGCAA GCTATCTGCT GGGAGGTCGT  |
| 1381                         | GGTGGTCTGA CAGTACCGG TTGTGATCGT GGTGCATTG TTCGTACCGC AGGTCAGGCA    |
| 1441                         | CTGCCGGATC TGCAGGTACG TTTTGTCCG GGTATGGCAC TGGATCCGGA TGGTGTTAGC   |
| 1501                         | ACCTATGTTT GTTTTGAAA ATTTAGAGC CAGGGTCTGA AATGGCCGAG CGGTATTACC    |
| 1561                         | ATGCAGCTGA TTGCATGTCG TCCGCAGAGC ACCGGTAGCG TTGGTCTGAA AAGCGCAGAT  |
| 1621                         | CCGTTTGCAC CGCCTAAACT GAGTCCGGT TATCTGACCG ATAAAGATGG TGCAGATCTG   |
| 1681                         | GCAACCCTGC GTAAAGGTAT TCATTGGGCA CGTGATGTTG CACGTAGCAG CGCACTGAGC  |
| 1741                         | GAATATCTGG ATGGTGA ACT GTTCCGGGT AGCGGTGTTG TTAGTGATGA TCAGATTGAT  |
| 1801                         | GAATATATCC GTCGCAGCAT TCATAGCAGC AATGCAATTA CCGGCACCTG TAAAATGGGT  |
| 1861                         | AATGCCGGTG ATAGCAGCAG CGTTGTTGAT AATCAGCTGC GTGTTTATGG TGTGGAAGGT  |
| 1921                         | CTGCGTGTG TTGATGCAAG CGTTGTTCCG AAAATTCCGG GTGGTCAGAC AGGTGCACCG   |
| 1981                         | GTTGTATATG TTGAGAACG TGCAGCAGCA CTGCTGACCG GTAAAGCAAC CATTGGTGCA   |
| 2041                         | AGCGCAGCAG CACCGGCAAC CGTTGCAGCA TGA                               |

---

**Supplementary Table 6** Characterization data of prepared substrates and products.

| Compounds                                                                                                                                      | Characterization data                                                                                                                                                                                                                                                                                                                                                                                                                                                                                                     |
|------------------------------------------------------------------------------------------------------------------------------------------------|---------------------------------------------------------------------------------------------------------------------------------------------------------------------------------------------------------------------------------------------------------------------------------------------------------------------------------------------------------------------------------------------------------------------------------------------------------------------------------------------------------------------------|
| 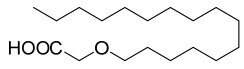 <p><b>2-(Hexadecyloxy)acetic acid (1I)</b></p>               | $^1\text{H NMR}$ (400 MHz, $\text{CDCl}_3$ ) $\delta$ 4.09 (s, 2H), 3.57 (t, $J = 6.7$ Hz, 2H), 1.67 – 1.60 (m, 2H), 1.28 (s, 26H), 0.88 (t, 3H).<br>$^{13}\text{C NMR}$ (100 MHz, $\text{CDCl}_3$ ) $\delta$ 172.64, 72.23, 67.74, 31.95, 29.71, 29.67, 29.60, 29.56, 29.42, 29.38, 25.91, 22.71, 14.14.<br>HRMS (EI-TOF) $m/z$ : $[\text{M}]^+$ Calcd for $\text{C}_{18}\text{H}_{36}\text{O}_3$ 300.2665; Found 300.2669.                                                                                              |
|  <p><b>2-(Dodecyloxy)acetic acid (2K)</b></p>                 | $^1\text{H NMR}$ (400 MHz, $\text{CDCl}_3$ ) $\delta$ 4.12 (s, 2H), 3.55 (t, $J = 6.7$ Hz, 2H), 1.72 – 1.57 (m, 2H), 1.26 (m, 18H), 0.88 (t, $J = 6.7$ Hz, 3H).<br>$^{13}\text{C NMR}$ (100 MHz, $\text{CDCl}_3$ ) $\delta$ 174.78, 72.20, 67.73, 31.93, 29.66, 29.64, 29.59, 29.56, 29.43, 29.40, 29.36, 25.91, 22.70, 14.12.<br>HRMS (EI-TOF) $m/z$ : $[\text{M}]^+$ Calcd for $\text{C}_{14}\text{H}_{28}\text{O}_3$ 244.2038; Found 244.2039.                                                                         |
|  <p><b>2-(Heptan-3-yloxy)acetic acid (4A)</b></p>             | $^1\text{H NMR}$ (400 MHz, $\text{CDCl}_3$ ) $\delta$ 4.04 (s, 2H), 3.29 (m, 1H), 1.55 – 1.36 (m, 4H), 1.35 – 1.16 (m, 4H), 0.89 – 0.80 (m, 6H).<br>$^{13}\text{C NMR}$ (100 MHz, $\text{CDCl}_3$ ) $\delta$ 173.68, 82.51, 65.85, 32.70, 27.41, 26.02, 22.80, 14.02, 9.36.<br>HRMS (EI-TOF) $m/z$ : $[\text{M}]^+$ Calcd for $\text{C}_9\text{H}_{18}\text{O}_3$ 174.1256; Found 174.1257.                                                                                                                               |
|  <p><b>2-(Octan-2-yloxy)acetic acid (4B)</b></p>            | $^1\text{H NMR}$ (400 MHz, $\text{CDCl}_3$ ) $\delta$ 4.25 – 4.03 (m, 2H), 3.55 (m, 1H), 1.68 – 1.39 (m, 2H), 1.39 – 1.21 (m, 8H), 1.19 (d, $J = 6.1$ Hz, 3H), 0.94 – 0.83 (m, 3H).<br>$^{13}\text{C NMR}$ (100 MHz, $\text{CDCl}_3$ ) $\delta$ 174.27, 77.29, 65.48, 36.21, 31.78, 29.32, 25.36, 22.61, 19.32, 14.09.<br>HRMS (EI-TOF) $m/z$ : $[\text{M}]^+$ Calcd for $\text{C}_{10}\text{H}_{20}\text{O}_3$ 188.1412; Found 188.1411.                                                                                 |
|  <p><b>2-(Oct-1-en-3-yloxy)acetic acid (4C)</b></p>         | $^1\text{H NMR}$ (400 MHz, $\text{CDCl}_3$ ) $\delta$ 5.65 (ddd, $J = 17.1, 10.2, 8.1$ Hz, 1H), 5.26 (dd, $J = 10.3, 1.6$ Hz, 1H), 5.27 – 5.17 (m, 1H), 4.14 (q, $J = 16.9$ Hz, 2H), 3.76 (m, 1H), 1.77 – 1.48 (m, 2H), 1.41 – 1.29 (m, 6H), 0.92 – 0.85 (m, 3H).<br>$^{13}\text{C NMR}$ (100 MHz, $\text{CDCl}_3$ ) $\delta$ 176.07, 137.63, 118.52, 82.56, 64.79, 35.00, 31.65, 24.80, 22.49, 13.93.<br>HRMS (EI-TOF) $m/z$ : $[\text{M}]^+$ Calcd for $\text{C}_{10}\text{H}_{18}\text{O}_3$ 186.1256; Found 186.1253. |
|  <p><b>2-(Heptan-2-yloxy)acetic acid (4D)</b></p>           | $^1\text{H NMR}$ (400 MHz, $\text{CDCl}_3$ ) $\delta$ 3.97 (m, 2H), 3.37 (m, 1H), 1.45 – 1.15 (m, 2H), 1.15 – 1.09 (m, 6H), 1.02 (d, $J = 6.2$ Hz, 3H), 0.72 (t, $J = 6.9$ Hz, 3H).<br>$^{13}\text{C NMR}$ (100 MHz, $\text{CDCl}_3$ ) $\delta$ 174.25, 77.29, 65.48, 36.17, 31.83, 25.06, 22.59, 1.32, 14.02.<br>HRMS (EI-TOF) $m/z$ : $[\text{M}]^+$ Calcd for $\text{C}_9\text{H}_{18}\text{O}_3$ 174.1256; Found 174.1259.                                                                                            |
|  <p><b>2-((6-Methylheptan-2-yl)oxy)acetic acid (4E)</b></p> | $^1\text{H NMR}$ (400 MHz, $\text{CDCl}_3$ ) $\delta$ 10.65 (s, 1H), 4.25 – 4.04 (m, 2H), 3.54 (m, 1H), 1.57 (ddt, $J = 26.3, 13.3, 6.6$ Hz, 2H), 1.48 – 1.25 (m, 3H), 1.18 (m, 5H), 0.87 (d, $J = 6.7$ Hz, 6H).<br>$^{13}\text{C NMR}$ (100 MHz, $\text{CDCl}_3$ ) $\delta$ 175.73, 76.96, 65.28, 38.89, 36.33, 27.83, 23.07, 22.51, 22.47, 19.12.<br>HRMS (EI-TOF) $m/z$ : $[\text{M}]^+$ Calcd for $\text{C}_{10}\text{H}_{20}\text{O}_3$ 188.1412; Found 188.1409.                                                    |
|                                                             | $^1\text{H NMR}$ (400 MHz, $\text{CDCl}_3$ ) $\delta$ 10.41 (s, 1H), 4.07 (d, $J = 2.4$ Hz, 2H), 3.08 (m, 1H), 1.89 – 1.72 (m, 1H), 1.51 – 1.16 (m, 4H), 0.84 (m, 9H).                                                                                                                                                                                                                                                                                                                                                    |

|                                                                                                                                                   |                                                                                                                                                                                                                                                                                                                                                                                                                                                                                                                                                                                                                        |
|---------------------------------------------------------------------------------------------------------------------------------------------------|------------------------------------------------------------------------------------------------------------------------------------------------------------------------------------------------------------------------------------------------------------------------------------------------------------------------------------------------------------------------------------------------------------------------------------------------------------------------------------------------------------------------------------------------------------------------------------------------------------------------|
| <p><b>2-((2-Methylhexan-3-yl)oxy)acetic acid (4F)</b></p>                                                                                         | <p><math>^{13}\text{C}</math> NMR (100 MHz, <math>\text{CDCl}_3</math>) <math>\delta</math> 175.43, 86.21, 66.76, 32.21, 30.37, 18.82, 18.12, 17.70, 14.16.</p> <p>HRMS (EI-TOF) m/z: <math>[\text{M}]^+</math> Calcd for <math>\text{C}_9\text{H}_{18}\text{O}_3</math> 174.1256; Found 174.1255.</p>                                                                                                                                                                                                                                                                                                                 |
| <p>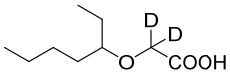</p> <p><b>2-((Heptan-3-yloxy)acetic-2,2-d2 acid (4G)</b></p> | <p><math>^1\text{H}</math> NMR (400 MHz, <math>\text{CDCl}_3</math>) <math>\delta</math> 4.10 (m, 0.25H), 3.36 (m, 1H), 1.65 – 1.43 (m, 4H), 1.42 – 1.26 (m, 4H), 0.91 (m, 6H).</p> <p><math>^{13}\text{C}</math> NMR (100 MHz, <math>\text{CDCl}_3</math>) <math>\delta</math> 174.00, 82.39, 65.53 (t, C-D), 32.70, 27.40, 26.02, 22.81, 14.04, 9.37.</p> <p>HRMS (EI-TOF) m/z: <math>[\text{M}]^+</math> Calcd for <math>\text{C}_9\text{H}_{16}\text{D}_2\text{O}_3</math> 176.1382; Found 176.1385.</p>                                                                                                           |
| <p></p> <p><b>2-((Octan-2-yloxy)acetic-2,2-d2 acid (4H)</b></p>  | <p><math>^1\text{H}</math> NMR (400 MHz, <math>\text{CDCl}_3</math>) <math>\delta</math> 6.91 (s, 1H), 4.00 (m, 0.33H), 3.50 (p, 1H), 1.45 – 1.27 (m, 2H), 1.27 – 1.16 (m, 8H), 1.13 (d, <math>J = 5.1</math> Hz, 3H), 0.89 – 0.76 (m, 3H).</p> <p><math>^{13}\text{C}</math> NMR (100 MHz, <math>\text{CDCl}_3</math>) <math>\delta</math> 173.03, 76.16, 63.71, 35.23, 30.77, 28.30, 24.34, 21.59, 18.31, 13.06.</p> <p>HRMS (EI-TOF) m/z: <math>[\text{M}]^+</math> Calcd for <math>\text{C}_{10}\text{H}_{18}\text{D}_2\text{O}_3</math> 190.1538; Found 190.1540.</p>                                             |
| <p></p> <p><b>2-((Oct-1-yn-3-yloxy)acetic acid (4I)</b></p>      | <p><math>^1\text{H}</math> NMR (400 MHz, <math>\text{CDCl}_3</math>) <math>\delta</math> 9.76 (s, 1), 4.50 – 4.01 (m, 3H), 2.43 (d, <math>J = 2.1</math> Hz, 1H), 1.84 – 1.59 (m, 2H), 1.49 – 1.34 (m, 2H), 1.33 – 1.15 (m, 4H), 0.88 – 0.72 (m, 3H).</p> <p><math>^{13}\text{C}</math> NMR (100 MHz, <math>\text{CDCl}_3</math>) <math>\delta</math> 175.75, 81.40, 75.11, 70.03, 64.91, 35.24, 31.38, 24.66, 22.48, 13.96.</p> <p>HRMS (EI-TOF) m/z: <math>[\text{M}]^+</math> Calcd for <math>\text{C}_{10}\text{H}_{16}\text{O}_3</math> 184.1099; Found 184.1101.</p>                                             |
| <p></p> <p><b>Pentadecane-1-d (1a)</b></p>                     | <p><math>^1\text{H}</math> NMR (400 MHz, <math>\text{CDCl}_3</math>) <math>\delta</math> 1.26 (m, 26H), 0.88 (m, 5H).</p> <p>93% D-inc. calculated from <math>^1\text{H}</math> NMR. 91% D-inc. calculated from HRMS.</p> <p><math>^{13}\text{C}</math> NMR (100 MHz, <math>\text{CDCl}_3</math>) <math>\delta</math> 31.95, 31.92, 29.73, 29.68, 29.39, 22.72, 22.63, 14.14-13.65(-<math>\text{CH}_2</math>-D, -<math>\text{CH}_3</math>).</p> <p>HRMS (EI-TOF) m/z: <math>[\text{M}]^+</math> Calcd for <math>\text{C}_{15}\text{H}_{31}\text{D}</math> 213.2567; Found 213.2593.</p>                                |
| <p></p> <p><b>Heptadecane-1-d (1b)</b></p>                     | <p><math>^1\text{H}</math> NMR (400 MHz, <math>\text{CDCl}_3</math>) <math>\delta</math> 1.26 (m, 30H), 0.92 – 0.86 (m, 5H).</p> <p>95% D-inc. calculated from <math>^1\text{H}</math> NMR. 94% D-inc. calculated from HRMS.</p> <p><math>^{13}\text{C}</math> NMR (100 MHz, <math>\text{CDCl}_3</math>) <math>\delta</math> 31.95, 31.92, 29.72, 29.68, 29.39, 22.72, 22.68, 22.63, 14.14-13.65(-<math>\text{CH}_2</math>-D, -<math>\text{CH}_3</math>).</p> <p>HRMS (EI-TOF) m/z: <math>[\text{M}]^+</math> Calcd for <math>\text{C}_{17}\text{H}_{35}\text{D}</math> 241.2880; Found 241.2880.</p>                  |
| <p></p> <p><b>Octadecane-1-d (1c)</b></p>                      | <p><math>^1\text{H}</math> NMR (400 MHz, <math>\text{CDCl}_3</math>) <math>\delta</math> 1.29 – 1.26 (m, 32H), 0.90-0.86 (m, 5H).</p> <p>96% D-inc. calculated from <math>^1\text{H}</math> NMR. 95% D-inc. calculated from HRMS.</p> <p><math>^{13}\text{C}</math> NMR (100 MHz, <math>\text{CDCl}_3</math>) <math>\delta</math> 31.96, 31.93, 29.74, 29.70, 29.40, 22.72, 22.63, 14.11-13.62 (-<math>\text{CH}_2</math>-D, -<math>\text{CH}_3</math>).</p> <p>HRMS (EI-TOF) m/z: <math>[\text{M}]^+</math> Calcd for <math>\text{C}_{18}\text{H}_{37}\text{D}</math> 255.3036; Found 255.3036.</p>                   |
| <p></p> <p><b>(Z)-Heptadec-8-ene-1-d (1d)</b></p>              | <p><math>^1\text{H}</math> NMR (400 MHz, <math>\text{CDCl}_3</math>) <math>\delta</math> 5.28 (m, 2H), 1.99 – 1.90 (m, 4H), 1.20 (m, 22H), 0.81 (m, 5H).</p> <p>91% D-inc. calculated from <math>^1\text{H}</math> NMR.</p> <p><math>^{13}\text{C}</math> NMR (100MHz, <math>\text{CDCl}_3</math>) <math>\delta</math> 128.90, 30.91, 30.86, 28.78, 28.53, 28.32, 28.28, 28.24, 26.20, 21.68, 21.59, 13.10-12.61 (-<math>\text{CH}_2</math>-D, -<math>\text{CH}_3</math>).</p> <p>HRMS (EI-TOF) m/z: <math>[\text{M}]^+</math> Calcd for <math>\text{C}_{17}\text{H}_{33}\text{D}</math> 239.2723; Found 239.2719.</p> |
| <p></p> <p><b>(E)-Heptadec-8-ene-1-d (1e)</b></p>              | <p><math>^1\text{H}</math> NMR (400 MHz, <math>\text{CDCl}_3</math>) <math>\delta</math> 5.38 (m, 2H), 1.96 (q, <math>J = 6.7</math> Hz, 4H), 1.26 (s, 22H), 0.90 – 0.86 (m, 5H).</p> <p><math>^{13}\text{C}</math> NMR (100 MHz, <math>\text{CDCl}_3</math>) <math>\delta</math> 130.38, 32.63, 31.92, 31.87, 31.61, 29.68, 29.52, 29.34, 29.23, 29.19, 29.15, 22.70, 22.68, 22.61, 14.14-13.64 (-<math>\text{CH}_2</math>-D, -<math>\text{CH}_3</math>).</p>                                                                                                                                                         |

|                                                                                                                                       |                                                                                                                                                                                                                                                                                                                                                                                                                                                                                                                                             |
|---------------------------------------------------------------------------------------------------------------------------------------|---------------------------------------------------------------------------------------------------------------------------------------------------------------------------------------------------------------------------------------------------------------------------------------------------------------------------------------------------------------------------------------------------------------------------------------------------------------------------------------------------------------------------------------------|
|                                                                                                                                       | <p>HRMS (EI-TOF) m/z: [M]<sup>+</sup> Calcd for C<sub>17</sub>H<sub>33</sub>D 239.2723; Found 239.2729.</p> <p>96% D-inc. calculated from HRMS.</p>                                                                                                                                                                                                                                                                                                                                                                                         |
| 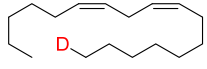 <p><b>(6Z,9Z)-Heptadeca-6,9-diene-17-d (1f)</b></p> | <p><sup>1</sup>H NMR (400 MHz, CDCl<sub>3</sub>) δ 5.35 (m, 4H), 2.78 (t, <i>J</i> = 6.5 Hz, 2H), 2.05 (q, <i>J</i> = 6.9 Hz, 4H), 1.43 – 1.18 (m, 16H), 0.88 (m, 5H).</p> <p><sup>13</sup>C NMR (100 MHz, CDCl<sub>3</sub>) δ 130.21, 127.97, 31.87, 31.56, 29.71, 29.38, 29.31, 29.25, 27.26, 27.22, 25.64, 22.60, 14.13-13.63 (-CH<sub>2</sub>-D, -CH<sub>3</sub>).</p> <p>HRMS (EI-TOF) m/z: [M]<sup>+</sup> Calcd for C<sub>17</sub>H<sub>31</sub>D 237.2567; Found 237.2567.</p> <p>93% D-inc. calculated from HRMS.</p>              |
|  <p><b>Heptadecan-17-d-7-ol (1g)</b></p>             | <p><sup>1</sup>H NMR (400 MHz, CDCl<sub>3</sub>) δ 3.52 (m, 1H), 1.36 (m, 8H), 1.20 (m, 20H), 0.82 (m, 5H).</p> <p>87% D-inc. calculated from <sup>1</sup>H NMR.</p> <p><sup>13</sup>C NMR (100 MHz, CDCl<sub>3</sub>) δ 72.05, 37.51, 31.89, 29.73, 29.64, 29.39, 29.35, 25.67, 25.63, 22.62, 14.09-13.63 (-CH<sub>2</sub>-D, -CH<sub>3</sub>).</p> <p>HRMS (EI-TOF) m/z: [M]<sup>+</sup> Calcd for C<sub>17</sub>H<sub>35</sub>DO 257.2829; Found 257.2514.</p>                                                                           |
|  <p><b>Methyl tetradecanoate-14-d (1h)</b></p>       | <p><sup>1</sup>H NMR (400 MHz, CDCl<sub>3</sub>) δ 3.67 (s, 3H), 2.30 (t, <i>J</i> = 7.6 Hz, 2H), 1.62 (m, 2H), 1.25 (m, 20H), 0.90 – 0.83 (m, 2H).</p> <p><sup>13</sup>C NMR (100 MHz, CDCl<sub>3</sub>) δ 174.41, 51.47, 34.14, 31.91, 29.69, 29.66, 29.62, 29.47, 29.38, 29.28, 29.17, 24.98, 22.62, 14.03-13.65 (-CH<sub>2</sub>-D).</p> <p>HRMS (EI-TOF) m/z: [M]<sup>+</sup> Calcd for C<sub>15</sub>H<sub>29</sub>DO<sub>2</sub> 243.2309; Found 243.2311.</p> <p>96% D-inc. calculated from HRMS.</p>                               |
|  <p><b>1-(Methoxy-d)hexadecane (1i)</b></p>        | <p><sup>1</sup>H NMR (400 MHz, CDCl<sub>3</sub>) δ 3.36 (t, <i>J</i> = 6.6 Hz, 2H), 3.34 – 3.30 (m, 2H), 1.60 – 1.50 (m, 2H), 1.25 (m, 26H), 0.88 (t, <i>J</i> = 6.8 Hz, 3H).</p> <p>96% D-inc. calculated from <sup>1</sup>H NMR.</p> <p><sup>13</sup>C NMR (100 MHz, CDCl<sub>3</sub>) δ 72.97, 58.55-58.04 (-OCH<sub>2</sub>-D), 31.94, 29.71, 29.67, 29.62, 29.53, 29.38, 26.16, 22.71, 14.13.</p> <p>HRMS (EI-TOF) m/z: [M]<sup>+</sup> Calcd for C<sub>17</sub>H<sub>35</sub>DO 257.2829; Found 257.2849.</p>                         |
|  <p><b>Tridecane-1,13-d2 (1j)</b></p>              | <p><sup>1</sup>H NMR (400 MHz, CDCl<sub>3</sub>) δ 1.26 (m, 22H), 0.90 – 0.82 (m, 4H).</p> <p><sup>13</sup>C NMR (100 MHz, CDCl<sub>3</sub>) δ 31.92, 29.73, 29.69, 29.40, 22.63, 14.13-13.64 (-CH<sub>2</sub>-D).</p> <p>HRMS (EI-TOF) m/z: [M]<sup>+</sup> Calcd for C<sub>13</sub>H<sub>27</sub>D 185.2254; Found 185.2250.</p> <p>HRMS (EI-TOF) m/z: [M]<sup>+</sup> Calcd for C<sub>13</sub>H<sub>26</sub>D<sub>2</sub> 186.2317; Found 186.2319.</p> <p>91% 2D-inc. calculated from HRMS.</p>                                         |
|  <p><b>Heptadecan-7-yl-17-d acetate (1k)</b></p>   | <p><sup>1</sup>H NMR (400 MHz, CDCl<sub>3</sub>) δ 4.79 (m, 1H), 1.97 (s, 3H), 1.43 (m, 4H), 1.19 (s, 24H), 0.81 (t, <i>J</i> = 6.7 Hz, 5H).</p> <p>83% D-inc. calculated from <sup>1</sup>H NMR.</p> <p><sup>13</sup>C NMR (100 MHz, CDCl<sub>3</sub>) δ 170.97, 74.48, 34.13, 31.89, 31.76, 29.61, 29.59, 29.55, 29.34, 29.22, 25.32, 25.28, 22.59, 21.30, 14.06-13.62 (-CH<sub>2</sub>-D, -CH<sub>3</sub>).</p> <p>HRMS (EI-TOF) m/z: [M]<sup>+</sup> Calcd for C<sub>19</sub>H<sub>37</sub>DO<sub>2</sub> 299.2935; Found 299.2944.</p> |
|  <p><b>Octane-1-d (2a)</b></p>                     | <p>HRMS (EI-TOF) m/z: [M]<sup>+</sup> Calcd for C<sub>8</sub>H<sub>17</sub>D 115.1471; Found 115.1473.</p> <p>98% D-inc. calculated from HRMS.</p>                                                                                                                                                                                                                                                                                                                                                                                          |
|                                                    | <p><sup>1</sup>H NMR (400 MHz, CDCl<sub>3</sub>) δ 1.26 (m, 18H), 0.88 (m, 5H).</p> <p><sup>13</sup>C NMR (100 MHz, CDCl<sub>3</sub>) δ 31.95, 31.92, 29.73, 29.68, 29.39, 22.71, 22.63, 14.12-13.64 (-CH<sub>2</sub>-D, -CH<sub>3</sub>).</p>                                                                                                                                                                                                                                                                                              |

|                                                                                                                                             |                                                                                                                                                                                                                                                                                                                                                                                                                                                                                                                                            |
|---------------------------------------------------------------------------------------------------------------------------------------------|--------------------------------------------------------------------------------------------------------------------------------------------------------------------------------------------------------------------------------------------------------------------------------------------------------------------------------------------------------------------------------------------------------------------------------------------------------------------------------------------------------------------------------------------|
| <p><b>Undecane-1-d (2b)</b></p>                                                                                                             | <p>HRMS (EI-TOF) m/z: [M]<sup>+</sup> Calcd for C<sub>11</sub>H<sub>23</sub>D 157.1941; Found 157.1944.<br/>95% D-inc. calculated from HRMS.</p>                                                                                                                                                                                                                                                                                                                                                                                           |
| <p>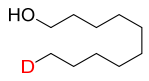<br/><b>Decan-10-d-1-ol (2c)</b></p>                    | <p><sup>1</sup>H NMR (400 MHz, CDCl<sub>3</sub>) δ 3.62 (t, <i>J</i> = 6.7 Hz, 2H), 1.96 (m, 1H), 1.55 (m, 2H), 1.27 (m, 14H), 0.92 – 0.81 (m, 2H).<br/>90% D-inc. calculated from <sup>1</sup>H NMR.<br/><sup>13</sup>C NMR (100 MHz, CDCl<sub>3</sub>) δ 62.94, 32.77, 31.90, 31.87, 29.63, 29.57, 29.46, 29.34, 25.76, 22.67, 22.59, 14.08-13.59 (-CH<sub>2</sub>-D).<br/>HRMS (EI-TOF) m/z: [M]<sup>+</sup> Calcd for C<sub>10</sub>H<sub>21</sub>DO 159.1733; Found 159.1724.</p>                                                     |
| <p><br/><b>1-Bromodecane-10-d (2d)</b></p>                 | <p><sup>1</sup>H NMR (400 MHz, CDCl<sub>3</sub>) δ 3.40 (t, <i>J</i> = 6.9 Hz, 2H), 1.85 (m, 2H), 1.42 (m, 2H), 1.27 (s, 12H), 0.88 (t, <i>J</i> = 6.8 Hz, 2H).<br/><sup>13</sup>C NMR (100 MHz, CDCl<sub>3</sub>) δ 34.01, 32.87, 31.90, 31.87, 29.53, 29.47, 29.32, 28.80, 28.21, 22.69, 22.61, 14.12-13.63 (-CH<sub>2</sub>-D).<br/>HRMS (EI-TOF) m/z: [M]<sup>+</sup> Calcd for C<sub>10</sub>H<sub>20</sub>DBr 221.0889; Found 221.0898.<br/>99% D-inc. calculated from HRMS.</p>                                                     |
| <p><br/><b>Heptan-7-d-1-ol (2e)</b></p>                    | <p><sup>1</sup>H NMR (400 MHz, CDCl<sub>3</sub>) δ 4.61 (s, 1H), 3.67 (t, <i>J</i> = 6.9 Hz, 2H), 1.55 (p, <i>J</i> = 6.8 Hz, 2H), 1.23 (m, 8H), 0.87 – 0.75 (m, 2H).<br/>87% D-inc. calculated from <sup>1</sup>H NMR.<br/><sup>13</sup>C NMR (100 MHz, CDCl<sub>3</sub>) δ 64.00, 32.01, 31.77, 31.74, 29.02, 25.52, 22.57, 22.49, 14.02-13.53 (-CH<sub>2</sub>-D).<br/>HRMS (EI-TOF) m/z: [M]<sup>+</sup> Calcd for C<sub>7</sub>H<sub>15</sub>DO 117.1264; Found 117.1264.</p>                                                         |
| <p><br/><b>Heptane-1,7-d2 (2f)</b></p>                   | <p>HRMS (EI-TOF) m/z: [M]<sup>+</sup> Calcd for C<sub>7</sub>H<sub>13</sub>D 101.1315; Found 101.1301.<br/>HRMS (EI-TOF) m/z: [M]<sup>+</sup> Calcd for C<sub>7</sub>H<sub>14</sub>D<sub>2</sub> 102.1378; Found 102.1384.<br/>97% 2D-inc. calculated from HRMS.</p>                                                                                                                                                                                                                                                                       |
| <p><br/><b>Tert-butyl (pentyl-5-d)carbamate (2g)</b></p> | <p><sup>1</sup>H NMR (400 MHz, CDCl<sub>3</sub>) δ 4.68 (s, 1H), 3.11 (m, 2H), 1.48 (m, 2H), 1.44 (s, 9H), 1.30 (m, 4H), 0.95 – 0.84 (m, 2H).<br/>82% D-inc. calculated from <sup>1</sup>H NMR.<br/><sup>13</sup>C NMR (100 MHz, CDCl<sub>3</sub>) δ 155.99, 78.84, 40.55, 29.72, 28.91, 28.38, 22.32, 22.23, 13.95-13.46 (-CH<sub>2</sub>-D).<br/>HRMS (EI-TOF) m/z: [M]<sup>+</sup> Calcd for C<sub>10</sub>H<sub>20</sub>DNO<sub>2</sub> 188.1635; Found 188.1643.</p>                                                                  |
| <p><br/><b>Decyl-10-d acetate (2h)</b></p>               | <p><sup>1</sup>H NMR (400 MHz, CDCl<sub>3</sub>) δ 4.1 (t, <i>J</i> = 6.8 Hz, 2H), 2.0 (s, 3H), 1.6 (t, <i>J</i> = 7.1 Hz, 2H), 1.3 (d, <i>J</i> = 3.5 Hz, 14H), 0.9 – 0.8 (m, 2H).<br/>85% D-inc. calculated from <sup>1</sup>H NMR.<br/><sup>13</sup>C NMR (100 MHz, CDCl<sub>3</sub>) δ 171.30, 64.69, 31.90, 31.87, 29.54, 29.32, 29.27, 28.61, 25.92, 22.69, 22.60, 21.04, 14.12-13.63 (-CH<sub>2</sub>-D).<br/>HRMS (EI-TOF) m/z: [M]<sup>+</sup> Calcd for C<sub>12</sub>H<sub>23</sub>DO<sub>2</sub> 201.1839; Found 201.1841.</p> |
| <p><br/><b>Methyl octanoate-8-d (2i)</b></p>             | <p><sup>1</sup>H NMR (400 MHz, CDCl<sub>3</sub>) δ 3.60 (s, 3H), 2.23 (t, <i>J</i> = 15.1 Hz, 2H), 1.59 – 1.51 (m, 2H), 1.25 – 1.14 (m, 8H), 0.85 – 0.76 (m, 2H).<br/><sup>13</sup>C NMR (100 MHz, CDCl<sub>3</sub>) δ 173.38, 50.43, 33.11, 30.64, 30.61, 28.10, 27.91, 23.95, 21.49, 13.10-12.55 (-CH<sub>2</sub>-D).<br/>HRMS (EI-TOF) m/z: [M]<sup>+</sup> Calcd for C<sub>9</sub>H<sub>17</sub>DO<sub>2</sub> 159.1370; Found 159.1375.<br/>93% D-inc. calculated from HRMS.</p>                                                      |
| <p><br/><b>1-dodec-1-ene-10-d</b></p>                    | <p><sup>1</sup>H NMR (400 MHz, CDCl<sub>3</sub>) δ 5.82 (m, 1H), 5.10 – 4.87 (m, 2H), 2.12 – 1.97 (m, 2H), 1.37 (m, 2H), 1.27 (m, 10H), 0.88 (m, 2H).</p>                                                                                                                                                                                                                                                                                                                                                                                  |



|                                                                                                                                |                                                                                                                                                                                                                                                                                                                                                                                                                                                                                          |
|--------------------------------------------------------------------------------------------------------------------------------|------------------------------------------------------------------------------------------------------------------------------------------------------------------------------------------------------------------------------------------------------------------------------------------------------------------------------------------------------------------------------------------------------------------------------------------------------------------------------------------|
| <b>Dec-1-ene-10-d (2j)</b>                                                                                                     | <sup>13</sup> C NMR (100 MHz, CDCl <sub>3</sub> ) δ 139.31, 114.09, 33.84, 31.88, 29.49, 29.31, 29.18, 28.97, 22.60, 14.12-13.63 (-CH <sub>2</sub> -D).<br>HRMS (EI-TOF) m/z: [M] <sup>+</sup> Calcd for C <sub>10</sub> H <sub>19</sub> D 141.1628; Found 141.1617.<br>92% D-inc. calculated from HRMS.                                                                                                                                                                                 |
| 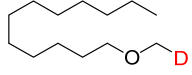<br><b>1-(Methoxy-d)dodecane (2k)</b>         | <sup>1</sup> H NMR (400 MHz, CDCl <sub>3</sub> ) δ 3.36 (m, 2H), 3.33 – 3.28 (m, 2H), 1.56 (m, 2H), 1.29 (s, 18H), 0.88 (t, J = 6.7 Hz, 3H).<br>95% D-inc. calculated from <sup>1</sup> H NMR.<br><sup>13</sup> C NMR (100 MHz, CDCl <sub>3</sub> ) δ 72.97, 58.47-58.04 (-OCH <sub>2</sub> -D), 31.94, 29.65, 29.62, 29.53, 29.36, 26.16, 22.70, 14.13.<br>HRMS (EI-TOF) m/z: [M] <sup>+</sup> Calcd for C <sub>13</sub> H <sub>27</sub> DO 201.2203; Found 201.2219.                   |
| <br><b>Ethane-d (3a)</b>                      | HRMS (EI-TOF) m/z: [M] <sup>+</sup> Calcd for C <sub>2</sub> H <sub>5</sub> D 31.0532; Found 31.0558.<br>98% D-inc. calculated from HRMS.                                                                                                                                                                                                                                                                                                                                                |
| <br><b>Hexane-1-d (3b)</b>                    | HRMS (EI-TOF) m/z: [M] <sup>+</sup> Calcd for C <sub>6</sub> H <sub>13</sub> D 87.1158; Found 87.1156.<br>97% D-inc. calculated from HRMS.                                                                                                                                                                                                                                                                                                                                               |
| <br><b>1-Chlorobutane-4-d (3c)</b>            | HRMS (EI-TOF) m/z: [M] <sup>+</sup> Calcd for C <sub>4</sub> H <sub>8</sub> DCl 93.0456; Found 93.0453.<br>83% D-inc. calculated from HRMS.                                                                                                                                                                                                                                                                                                                                              |
| <br><b>2, 2, 4-Trimethylpentane-5-d (3d)</b> | HRMS (EI-TOF) m/z: [M] <sup>+</sup> Calcd for C <sub>8</sub> H <sub>17</sub> D 115.1471; Found 115.1475.<br>99% D-inc. calculated from HRMS.                                                                                                                                                                                                                                                                                                                                             |
| <br><b>Butan-2-one-4-d (3e)</b>             | HRMS (EI-TOF) m/z: [M] <sup>+</sup> Calcd for C <sub>4</sub> H <sub>7</sub> DO 73.0638; Found 73.0642.<br>92% D-inc. calculated from HRMS.                                                                                                                                                                                                                                                                                                                                               |
| <br><b>Propane-1-d (3f)</b>                 | HRMS (EI-TOF) m/z: [M] <sup>+</sup> Calcd for C <sub>3</sub> H <sub>7</sub> D 45.0689; Found 45.0692.<br>88% D-inc. calculated from HRMS.                                                                                                                                                                                                                                                                                                                                                |
| <br><b>But-1-ene-4-d (3g)</b>               | HRMS (EI-TOF) m/z: [M] <sup>+</sup> Calcd for C <sub>4</sub> H <sub>7</sub> D 57.0689; Found 57.0689.<br>99% D-inc. calculated from HRMS.                                                                                                                                                                                                                                                                                                                                                |
| <br><b>Isobutane-1-d (3h)</b>               | HRMS (EI-TOF) m/z: [M] <sup>+</sup> Calcd for C <sub>4</sub> H <sub>9</sub> D 59.0845; Found 59.0847.<br>99% D-inc. calculated from HRMS.                                                                                                                                                                                                                                                                                                                                                |
| <br><b>3-(Methoxy-d)heptane (4a)</b>        | <sup>1</sup> H NMR (400 MHz, CDCl <sub>3</sub> ) δ 3.35 – 3.28 (m, 2H), 3.08 (m, 1H), 1.56 – 1.40 (m, 4H), 1.40 – 1.26 (m, 4H), 0.90 (q, J = 7.4, 7.0 Hz, 6H).<br>99% D-inc. calculated from <sup>1</sup> H NMR.<br><sup>13</sup> C NMR (100 MHz, CDCl <sub>3</sub> ) δ 82.07, 57.41-56.33 (-OCH <sub>2</sub> -D), 53.45 (DCM), 32.70, 27.55, 25.82, 22.94, 14.13, 9.37.<br>HRMS (EI-TOF) m/z: [M] <sup>+</sup> Calcd for C <sub>8</sub> H <sub>17</sub> DO 131.1420; Found 131.1411.    |
| <br><b>2-(Methoxy-d)octane (4b)</b>         | <sup>1</sup> H NMR (400 MHz, CDCl <sub>3</sub> ) δ 3.34 – 3.20 (m, 3H), 1.54 – 1.45 (m, 2H), 1.28 (m, 8H), 1.12 (d, J = 6.1 Hz, 3H), 0.92 – 0.84 (t, 3H).<br>99% D-inc. calculated from <sup>1</sup> H NMR.<br><sup>13</sup> C NMR (100 MHz, CDCl <sub>3</sub> ) δ 76.87, 55.86-55.44 (-OCH <sub>2</sub> -D), 53.44 (DCM), 36.36, 31.88, 29.46, 25.44, 22.64, 19.04, 14.11.<br>HRMS (EI-TOF) m/z: [M] <sup>+</sup> Calcd for C <sub>9</sub> H <sub>19</sub> DO 145.1577; Found 145.1581. |

|                                                                                                                                     |                                                                                                                                                                                                                                                                                                                                                                                                                                                                                                                                                                                                                                                                                                                                               |
|-------------------------------------------------------------------------------------------------------------------------------------|-----------------------------------------------------------------------------------------------------------------------------------------------------------------------------------------------------------------------------------------------------------------------------------------------------------------------------------------------------------------------------------------------------------------------------------------------------------------------------------------------------------------------------------------------------------------------------------------------------------------------------------------------------------------------------------------------------------------------------------------------|
| 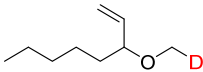 <p><b>3-(Methoxy-d)oct-1-ene (4c)</b></p>         | <p><math>^1\text{H NMR}</math> (400 MHz, <math>\text{CDCl}_3</math>) <math>\delta</math> 5.64 (ddd, <math>J = 16.9, 10.6, 7.8</math> Hz, 1H), 5.25 – 5.09 (m, 2H), 3.48 (m, 1H), 3.30 – 3.19 (m, 2H), 1.60 – 1.38 (m, 2H), 1.37 – 1.19 (m, 6H), 0.88 (t, <math>J = 6.8</math> Hz, 3H).</p> <p>93% D-inc. calculated from <math>^1\text{H NMR}</math>.</p> <p><math>^{13}\text{C NMR}</math> (100 MHz, <math>\text{CDCl}_3</math>) <math>\delta</math> 138.97, 117.04, 83.13, 56.14-55.64 (<math>-\text{OCH}_2\text{-D}</math>), 53.46 (DCM), 35.32, 31.84, 29.72, 24.99, 22.63, 14.08.</p> <p>HRMS (EI-TOF) <math>m/z</math>: <math>[\text{M}]^+</math> Calcd for <math>\text{C}_9\text{H}_{17}\text{DO}</math> 143.1420; Found 143.1425.</p> |
|  <p><b>2-(Methoxy-d)heptane (4d)</b></p>           | <p><math>^1\text{H NMR}</math> (400 MHz, <math>\text{CDCl}_3</math>) <math>\delta</math> 3.37 – 3.20 (m, 3H), 1.59 – 1.36 (m, 2H), 1.29 (m, 6H), 1.12 (d, <math>J = 6.1</math> Hz, 3H), 0.89 (t, <math>J = 6.8</math> Hz, 3H).</p> <p>99% D-inc. calculated from <math>^1\text{H NMR}</math>.</p> <p><math>^{13}\text{C NMR}</math> (100 MHz, <math>\text{CDCl}_3</math>) <math>\delta</math> 76.87, 55.86-55.43 (<math>-\text{OCH}_2\text{-D}</math>), 36.31, 32.01, 25.15, 22.67, 19.04, 14.08.</p> <p>HRMS (EI-TOF) <math>m/z</math>: <math>[\text{M}]^+</math> Calcd for <math>\text{C}_8\text{H}_{17}\text{DO}</math> 131.1420; Found 131.1420.</p>                                                                                      |
|  <p><b>2-(Methoxy-d)-6-methylheptane (4e)</b></p>  | <p><math>^1\text{H NMR}</math> (400 MHz, <math>\text{CDCl}_3</math>) <math>\delta</math> 3.32 – 3.29 (m, 3H), 1.57 – 1.48 (m, 2H), 1.26 (m, 5H), 1.12 (d, <math>J = 6.1</math> Hz, 3H), 0.90 – 0.86 (m, 6H).</p> <p>97% D-inc. calculated from <math>^1\text{H NMR}</math>.</p> <p><math>^{13}\text{C NMR}</math> (100 MHz, <math>\text{CDCl}_3</math>) <math>\delta</math> 60.45, 55.89-55.45 (<math>-\text{OCH}_2\text{-D}</math>), 53.47 (DCM), 39.11, 36.57, 30.99, 27.99, 23.24, 22.62, 19.04.</p> <p>HRMS (EI-TOF) <math>m/z</math>: <math>[\text{M}]^+</math> Calcd for <math>\text{C}_9\text{H}_{19}\text{DO}</math> 145.1577; Found 145.1580.</p>                                                                                    |
|  <p><b>3-(Methoxy-d)-2-methylhexane (4f)</b></p> | <p><math>^1\text{H NMR}</math> (400 MHz, <math>\text{CDCl}_3</math>) <math>\delta</math> 3.37 – 3.28 (m, 2H), 2.93 – 2.83 (m, 1H), 1.91 – 1.76 (m, 1H), 1.48 – 1.29 (m, 4H), 0.90 (m, 9H).</p> <p>96% D-inc. calculated from <math>^1\text{H NMR}</math>.</p> <p><math>^{13}\text{C NMR}</math> (100 MHz, <math>\text{CDCl}_3</math>) <math>\delta</math> 86.10, 57.67-57.15 (<math>-\text{OCH}_2\text{-D}</math>), 53.44 (DCM), 40.95 (DMSO), 32.47, 30.31, 19.02, 18.17, 17.94, 14.36.</p> <p>HRMS (EI-TOF) <math>m/z</math>: <math>[\text{M}]^+</math> Calcd for <math>\text{C}_8\text{H}_{17}\text{DO}</math> 131.1420; Found 131.1429.</p>                                                                                               |
|  <p><b>3-(Methoxy-d3)heptane (4g)</b></p>        | <p><math>^1\text{H NMR}</math> (400 MHz, <math>\text{CDCl}_3</math>) <math>\delta</math> 3.67 (m, 0.27H), 3.01 (m, 1H), 1.46 – 1.36 (m, 4H), 1.28 – 1.15 (m, 4H), 0.87 – 0.69 (m, 6H).</p> <p>98% D-inc. calculated from <math>^1\text{H NMR}</math>.</p> <p><math>^{13}\text{C NMR}</math> (100 MHz, <math>\text{CDCl}_3</math>) <math>\delta</math> 80.97, 54.68-54.26 (<math>-\text{OCD}_3</math>), 31.70, 26.53, 24.81, 21.93, 13.09, 8.34.</p> <p>HRMS (EI-TOF) <math>m/z</math>: <math>[\text{M}]^+</math> Calcd for <math>\text{C}_8\text{H}_{15}\text{D}_3\text{O}</math> 133.1546; Found 133.1544.</p>                                                                                                                               |
|  <p><b>2-(Methoxy-d3)octane (4h)</b></p>         | <p><math>^1\text{H NMR}</math> (400 MHz, <math>\text{CDCl}_3</math>) <math>\delta</math> 3.28 (m, 1H), 1.59 – 1.36 (m, 2H), 1.28 (m, 8H), 1.12 (d, <math>J = 6.1</math> Hz, 3H), 0.94 – 0.84 (m, 3H).</p> <p>94% D-inc. calculated from <math>^1\text{H NMR}</math>.</p> <p><math>^{13}\text{C NMR}</math> (100 MHz, <math>\text{CDCl}_3</math>) <math>\delta</math> 76.77, 55.24-54.81 (<math>-\text{OCD}_3</math>), 36.35, 31.87, 29.45, 25.43, 22.63, 19.03, 14.09.</p> <p>HRMS (EI-TOF) <math>m/z</math>: <math>[\text{M}]^+</math> Calcd for <math>\text{C}_9\text{H}_{17}\text{D}_3\text{O}</math> 147.1702; Found 147.1703.</p>                                                                                                        |
|  <p><b>3-(Methoxy-d)oct-1-yne (4i)</b></p>       | <p>HRMS (EI-TOF) <math>m/z</math>: <math>[\text{M}]^+</math> Calcd for <math>\text{C}_9\text{H}_{15}\text{DO}</math> 141.1264; Found 141.1252.</p> <p>97% D-inc. calculated from HRMS.</p>                                                                                                                                                                                                                                                                                                                                                                                                                                                                                                                                                    |
|  <p><b>Octan-8-d-4-ol (4j)</b></p>               | <p><math>^1\text{H NMR}</math> (400 MHz, <math>\text{CDCl}_3</math>) <math>\delta</math> 3.59 – 3.48 (m, 1H), 1.41 – 1.19 (m, 10H), 0.90 – 0.80 (m, 5H).</p> <p>92% D-inc. calculated from <math>^1\text{H NMR}</math>.</p> <p><math>^{13}\text{C NMR}</math> (100 MHz, <math>\text{CDCl}_3</math>) <math>\delta</math> 71.75, 39.66, 37.21, 27.85, 22.78, 18.75, 14.14-13.66</p>                                                                                                                                                                                                                                                                                                                                                             |

|                                                                                                                                      |                                                                                                                                                                                                                                                                                                                                                                                                                                                                                                                                                   |
|--------------------------------------------------------------------------------------------------------------------------------------|---------------------------------------------------------------------------------------------------------------------------------------------------------------------------------------------------------------------------------------------------------------------------------------------------------------------------------------------------------------------------------------------------------------------------------------------------------------------------------------------------------------------------------------------------|
|                                                                                                                                      | (-CH <sub>2</sub> -D, -CH <sub>3</sub> ).<br>HRMS (EI-TOF) m/z: [M] <sup>+</sup> Calcd for C <sub>8</sub> H <sub>17</sub> DO 131.1420; Found 131.1424.                                                                                                                                                                                                                                                                                                                                                                                            |
| 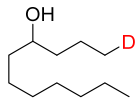<br><b>Undecan-1-d-4-ol (4k)</b>                    | <sup>1</sup> H NMR (400 MHz, CDCl <sub>3</sub> ) δ 3.60 (m, 1H), 1.43 (m, 6H), 1.29 (m, 10H), 0.88 (m, 5H).<br>83% D-inc. calculated from <sup>1</sup> H NMR.<br><sup>13</sup> C NMR (100 MHz, CDCl <sub>3</sub> ) δ 71.78, 39.65, 37.52, 31.85, 29.69, 29.32, 25.67, 22.67, 18.75, 14.11-13.65 (-CH <sub>2</sub> -D, -CH <sub>3</sub> ).<br>HRMS (EI-TOF) m/z: [M] <sup>+</sup> Calcd for C <sub>11</sub> H <sub>23</sub> DO 173.1890; Found 173.1899.                                                                                           |
| <br><b>(Propan-2-yl-1-d)benzene (5a)</b>            | <sup>1</sup> H NMR (400 MHz, CDCl <sub>3</sub> ) δ 7.26 – 7.07 (m, 5H), 2.83 (m, 1H), 1.18 (m, 5H).<br><sup>13</sup> C NMR (100 MHz, CDCl <sub>3</sub> ) δ 148.89, 128.32, 126.44, 125.77, 34.05, 24.00-23.53 (-CH <sub>2</sub> -D, -CH <sub>3</sub> ).<br>HRMS (EI-TOF) m/z: [M] <sup>+</sup> Calcd for C <sub>9</sub> H <sub>11</sub> D 121.1002; Found 121.1002.<br>93% D-inc. calculated from HRMS.                                                                                                                                           |
| <br><b>(Propyl-2-d)benzene (5b)</b>                 | <sup>1</sup> H NMR (400 MHz, CDCl <sub>3</sub> ) δ 7.29-7.24 (m, 2H), 7.21-7.14 (m, 3H), 2.62 – 2.54 (d, 2H), 1.69 – 1.55 (m, 1H), 0.98 – 0.83 (d, 3H).<br>94% D-inc. calculated from <sup>1</sup> H NMR.<br><sup>13</sup> C NMR (100 MHz, CDCl <sub>3</sub> ) δ 142.75, 128.51, 128.25, 125.63, 38.03, 30.36, 24.64-24.06 (-CHD-), 13.79.<br>HRMS (EI-TOF) m/z: [M] <sup>+</sup> Calcd for C <sub>9</sub> H <sub>11</sub> D 121.1002; Found 121.0998.                                                                                            |
| <br><b>(Propyl-3-d)benzene (5c)</b>               | <sup>1</sup> H NMR (400 MHz, CDCl <sub>3</sub> ) δ 7.31 – 7.23 (m, 2H), 7.22 – 7.12 (m, 3H), 2.62 – 2.54 (t, 2H), 1.71 – 1.57 (m, 2H), 0.92 (m, 2H).<br><sup>13</sup> C NMR (100 MHz, CDCl <sub>3</sub> ) δ 140.87, 126.63, 126.37, 123.76, 36.22, 22.68, 12.01-11.52 (-CH <sub>2</sub> -D).<br>HRMS (EI-TOF) m/z: [M] <sup>+</sup> Calcd for C <sub>9</sub> H <sub>11</sub> D 121.1002; Found 121.0999.<br>96% D-inc. calculated from HRMS.                                                                                                      |
| <br><b>1-Phenyl-1-propanone-3-d (5d)</b>          | <sup>1</sup> H NMR (400 MHz, CDCl <sub>3</sub> ) δ 7.95 – 7.79 (m, 2H), 7.51 – 7.41 (m, 1H), 7.37 (m, 2H), 3.08 – 2.71 (m, 2H), 1.17 – 1.08 (m, 2H).<br>86% D-inc. calculated from <sup>1</sup> H NMR.<br><sup>13</sup> C NMR (100 MHz, CDCl <sub>3</sub> ) δ 199.90, 135.88, 131.87, 127.53, 126.96, 30.75, 7.21-6.76 (-CH <sub>2</sub> -D).<br>HRMS (EI-TOF) m/z: [M] <sup>+</sup> Calcd for C <sub>9</sub> H <sub>9</sub> DO 135.0794; Found 135.0801.                                                                                         |
| <br><b>1-(4-Fluorophenyl)butan-1-one-4-d (5e)</b> | <sup>1</sup> H NMR (400 MHz, CDCl <sub>3</sub> ) δ 7.99 (dd, J = 8.7, 5.6 Hz, 2H), 7.12 (t, J = 8.6 Hz, 2H), 2.92 (t, J = 7.3 Hz, 2H), 1.84 – 1.69 (m, 2H), 1.09 – 0.93 (m, 2H).<br>87% D-inc. calculated from <sup>1</sup> H NMR.<br><sup>13</sup> C NMR (100 MHz, CDCl <sub>3</sub> ) δ 198.82, 166.91, 164.38, 133.55, 133.52, 130.70, 130.61, 128.84, 128.76, 115.73, 115.51, 40.41, 17.66, 13.86-13.37 (-CH <sub>2</sub> -D).<br>HRMS (EI-TOF) m/z: [M] <sup>+</sup> Calcd for C <sub>10</sub> H <sub>10</sub> DOF 167.0857; Found 167.0863. |
| <br><b>Methylcyclohexane-1-d (5f)</b>             | HRMS (EI-TOF) m/z: [M] <sup>+</sup> Calcd for C <sub>7</sub> H <sub>13</sub> D 99.1158; Found 99.1188.<br>97% D-inc. calculated from HRMS.                                                                                                                                                                                                                                                                                                                                                                                                        |
| <br><b>(Methyl-d)cyclohexane (5g)</b>             | HRMS (EI-TOF) m/z: [M] <sup>+</sup> Calcd for C <sub>7</sub> H <sub>13</sub> D 99.1158; Found 99.1161.<br>90% D-inc. calculated from HRMS.                                                                                                                                                                                                                                                                                                                                                                                                        |

|                                                                                                                                                                                                                       |                                                                                                                                                                                                                                                                                                                                                                                                                                                                                                                                                                                                                                                                                                                                                                                                                                                                                                                                                                                                                                                                                                                                                                                                            |
|-----------------------------------------------------------------------------------------------------------------------------------------------------------------------------------------------------------------------|------------------------------------------------------------------------------------------------------------------------------------------------------------------------------------------------------------------------------------------------------------------------------------------------------------------------------------------------------------------------------------------------------------------------------------------------------------------------------------------------------------------------------------------------------------------------------------------------------------------------------------------------------------------------------------------------------------------------------------------------------------------------------------------------------------------------------------------------------------------------------------------------------------------------------------------------------------------------------------------------------------------------------------------------------------------------------------------------------------------------------------------------------------------------------------------------------------|
| 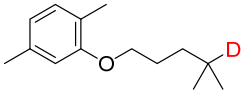 <p><b>1,4-dimethyl-2-((4-methylpentyl-4-d)oxy)benzene (5h), from Gemfibrozil.</b></p>                                               | <p><math>^1\text{H NMR}</math> (400 MHz, <math>\text{CDCl}_3</math>) <math>\delta</math> 7.00 (d, <math>J = 7.4</math> Hz, 1H), 6.69 – 6.60 (m, 2H), 3.92 (t, <math>J = 6.5</math> Hz, 2H), 2.31 (s, 3H), 2.18 (s, 3H), 1.85 – 1.73 (m, 2H), 1.43 – 1.29 (m, 2H), 0.92 (s, 6H).</p> <p>91% D-inc. calculated from <math>^1\text{H NMR}</math>.</p> <p><math>^{13}\text{C NMR}</math> (100 MHz, <math>\text{CDCl}_3</math>) <math>\delta</math> 157.15, 136.46, 130.27, 123.65, 120.55, 112.01, 68.18, 53.46, 35.20, 27.80-27.11 (<math>-\underline{\text{C}}-\text{D}</math>, <math>-\underline{\text{C}}-\text{H}</math>), 22.62, 22.49, 21.44, 15.82.</p> <p>HRMS (EI-TOF) <math>m/z</math>: <math>[\text{M}]^+</math> Calcd for <math>\text{C}_{14}\text{H}_{21}\text{DO}</math> 207.1733; Found 207.1736.</p>                                                                                                                                                                                                                                                                                                                                                                                          |
|  <p><b>(E)-7-hydroxy-5-methoxy-4-methyl-6-(3-methylpent-2-en-1-yl-5-d)isobenzofuran-1(3H)-one (5i), from Mycophenolic acid.</b></p>  | <p><math>^1\text{H NMR}</math> (400 MHz, <math>\text{CDCl}_3</math>) <math>\delta</math> 7.67 (s, 1H), 5.20 (s, 2H), 5.21 – 5.14 (m, 1H), 3.77 (s, 3H), 3.40 (d, <math>J = 6.9</math> Hz, 2H), 2.15 (s, 3H), 1.98 (t, <math>J = 7.4</math> Hz, 2H), 1.79 (s, 3H), 1.01 – 0.90 (m, 2H).</p> <p>91% D-inc. calculated from <math>^1\text{H NMR}</math>.</p> <p><math>^{13}\text{C NMR}</math> (100 MHz, <math>\text{CDCl}_3</math>) <math>\delta</math> 173.02, 163.73, 153.72, 143.89, 137.78, 122.66, 120.42, 116.72, 106.38, 70.07, 61.03, 32.28, 22.59, 16.15, 12.50-12.15 (<math>-\underline{\text{C}}\text{H}_2-\text{D}</math>, <math>-\underline{\text{C}}\text{H}_3</math>), 11.59.</p> <p>HRMS (EI-TOF) <math>m/z</math>: <math>[\text{M}]^+</math> Calcd for <math>\text{C}_{16}\text{H}_{19}\text{DO}_4</math> 277.1424; Found 277.1423.</p>                                                                                                                                                                                                                                                                                                                                                     |
|  <p><b>2-(ethyl-1-d)dibenzof[b,f]thiepin-10(11H)-one (5j), from Zaltoprofen.</b></p>                                                 | <p><math>^1\text{H NMR}</math> (400 MHz, <math>\text{CDCl}_3</math>) <math>\delta</math> 8.19 (dd, <math>J = 7.9, 1.7</math> Hz, 1H), 7.59 (dd, <math>J = 7.9, 1.3</math> Hz, 1H), 7.54 (d, <math>J = 7.9</math> Hz, 1H), 7.41 (td, <math>J = 7.6, 1.7</math> Hz, 1H), 7.35 – 7.24 (m, 2H), 7.03 (dd, <math>J = 7.9, 2.0</math> Hz, 1H), 4.34 (s, 0.67 H), 2.69 – 2.56 (m, 1H), 1.32 – 1.17 (d, 3H).</p> <p>93% D-inc. calculated from <math>^1\text{H NMR}</math>.</p> <p><math>^{13}\text{C NMR}</math> (100 MHz, <math>\text{CDCl}_3</math>) <math>\delta</math> 191.78, 146.66, 140.71, 137.51, 136.18, 132.43, 131.51, 131.32, 131.19, 130.78, 128.94, 126.79, 126.69, 51.06-50.52 (<math>-\text{C}(\text{O})-\underline{\text{C}}-\text{D}_2</math>, <math>-\text{C}(\text{O})-\underline{\text{C}}\text{H}-\text{D}</math>, <math>-\text{C}(\text{O})-\underline{\text{C}}\text{H}_2</math>), 28.54 - 28.01 (<math>-\underline{\text{C}}\text{H}-\text{D}</math>, <math>-\underline{\text{C}}\text{H}_2-</math>), 15.42, 15.34.</p> <p>HRMS (EI-TOF) <math>m/z</math>: <math>[\text{M}]^+</math> Calcd for <math>\text{C}_{16}\text{H}_{11}\text{D}_3\text{OS}</math> 257.0964; Found 257.0916.</p> |
|  <p><b>(4aS, 10aS)-7-isopropyl-1,4a-dimethyl-1,2,3,4,4a,9,10,10a-octahydrophenanthrene-1-d (5k), from Dehydroabietic acid.</b></p> | <p><math>^1\text{H NMR}</math> (400 MHz, <math>\text{CDCl}_3</math>) <math>\delta</math> 7.16 (d, <math>J = 8.1</math> Hz, 1H), 6.99 (dd, <math>J = 8.2, 2.1</math> Hz, 1H), 6.89 (s, 1H), 2.88 (td, <math>J = 7.0, 2.1</math> Hz, 2H), 2.84 – 2.76 (m, 1H), 2.28 – 2.15 (m, 1H), 2.02 – 1.88 (m, 1H), 1.85 – 1.69 (m, 2H), 1.68 (dd, <math>J = 12.8, 2.3</math> Hz, 1H), 1.56 (tt, <math>J = 10.0, 2.4</math> Hz, 3H), 1.48 (dtd, <math>J = 15.3, 5.6, 4.7, 2.5</math> Hz, 1H), 1.38 (td, <math>J = 13.2, 3.6</math> Hz, 1H), 1.23 (d, <math>J = 7.0, 1.8</math> Hz, 6H), 1.17 (s, <math>J = 0.8</math> Hz, 3H), 0.99 (s, 3H).</p> <p>90% D-inc. calculated from <math>^1\text{H NMR}</math>.</p> <p><math>^{13}\text{C NMR}</math> (100 MHz, <math>\text{CDCl}_3</math>) <math>\delta</math> 147.19, 145.45, 135.11, 127.00, 124.33, 123.83, 44.35, 38.62, 37.26, 33.48, 32.97, 30.38, 25.59, 24.55, 24.04, 24.02, 22.81-20.41 (<math>-\underline{\text{C}}-\text{D}</math>, <math>-\underline{\text{C}}-\text{H}</math>), 18.07, 15.05.</p> <p>HRMS (EI-TOF) <math>m/z</math>: <math>[\text{M}]^+</math> Calcd for <math>\text{C}_{19}\text{H}_{27}\text{D}</math> 257.2254; Found 257.2258.</p>        |

## Supplementary References

1. Xu, J., Arkin, M., Peng, Y. Z., Xu, W. H., Yu, H. L., Lin, X. F., Wu, Q. Enantiocomplementary decarboxylative hydroxylation combining photocatalysis and whole-cell biocatalysis in a one-pot cascade process. *Green Chem* **21**, 1907-1911 (2019).
2. Bagutski, V., Elford, T.G., Aggarwal, V.K. Synthesis of highly enantioenriched C-tertiary amines from boronic esters: application to the synthesis of Igmesine. *Angew. Chem. Int. Edit.* **50**, 1080-1083 (2011).
